# Supplementary material for: A quantitative structure-reactivity relationship in N-acetyl oxazolidines: an electrostatic interaction controls rotamer population
Source: Royal Society of Chemistry journal article supplement (doi:10.1039/c0ob01039a), 2011-01-01
Supplement: c0ob01039a.pdf [file c0ob01039a.pdf]

## ELECTRONIC SUPPLEMENTARY INFORMATION

### A quantitative structure-reactivity relationship in *N*-acetyl oxazolidines: an electrostatic interaction controls rotamer population

R. Fernando Martínez,\* Martín Ávalos, Reyes Babiano, Pedro Cintas, José L. Jiménez, Juan C. Palacios, and Esther M. S. Pérez

*Departamento de Química Orgánica e Inorgánica, QUOREX Research Group, Facultad de Ciencias-UEx, E-06006 Badajoz, Spain*

*rmarvaz@unex.es*

| <b>Pages</b> | <b>Supplementary Information</b>                                                                      |
|--------------|-------------------------------------------------------------------------------------------------------|
| S-2          | Figures S1, S2 and S3.<br>Hammett plots for compounds <b>1-10</b> , <b>13-22</b> , and <b>25-34</b> . |
| S-3          | Figures S4, S5 and S6.<br>Hammett plot for theoretical calculation.                                   |
| S-4          | Table S1 and Figures S7-S9.                                                                           |
| S-5          | Experimental.                                                                                         |
| S-8          | <sup>1</sup> H-NMR and <sup>13</sup> C-NMR for all new compounds.                                     |
| S-38         | Theoretical calculation. Cartesian coordinates and calculated energy.                                 |

Figure S1. Hammett plot for compounds **1-10**

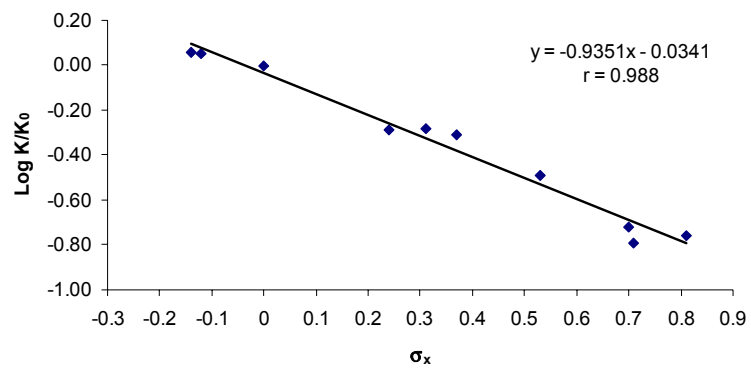

Figure S2. Hammett plot for compounds **13-22**

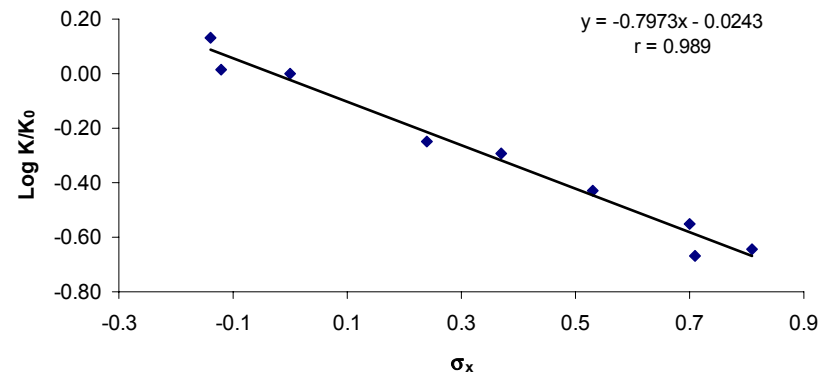

Figure S3. Hammett plot for compounds **25-34**

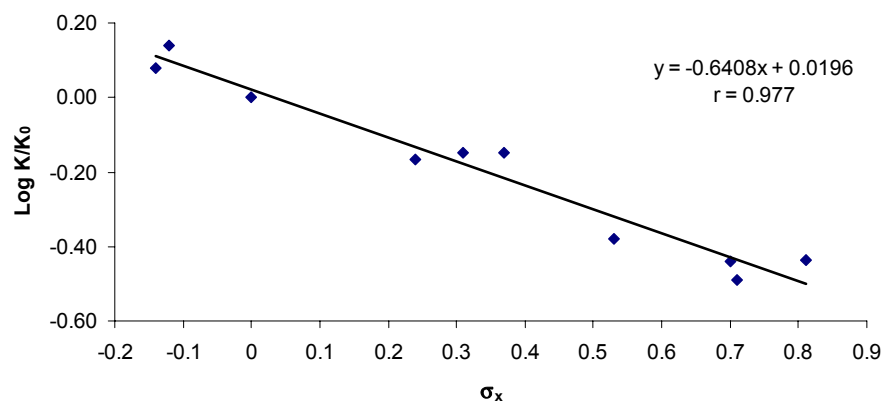

Figure S4. Hammett plot for theoretical calculation.

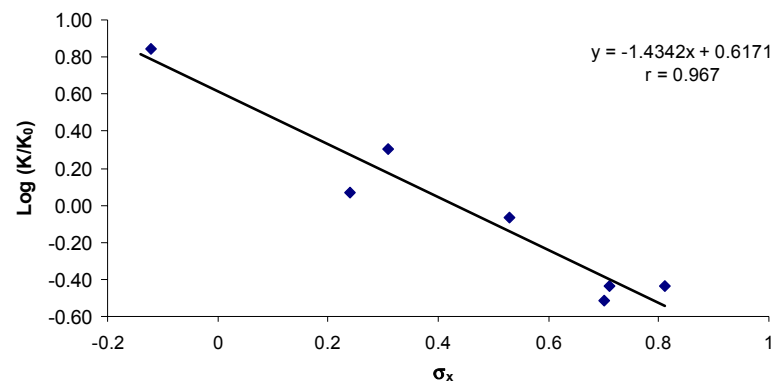

Figure S5. Hammett plot for  $d_1$  versus  $\sigma_x$

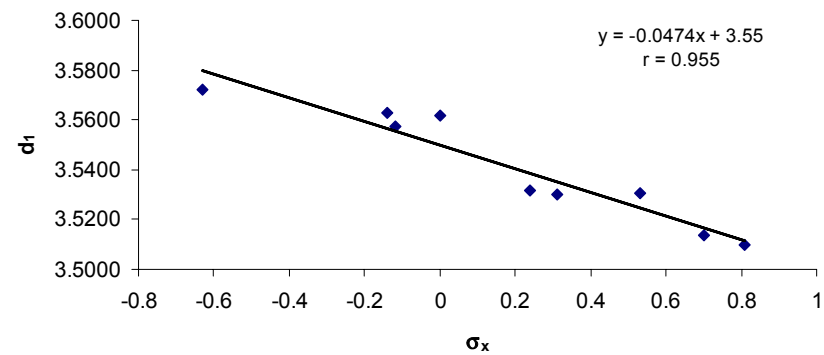

Figure S6. Hammett plot for  $d_2$  versus  $\sigma_x$

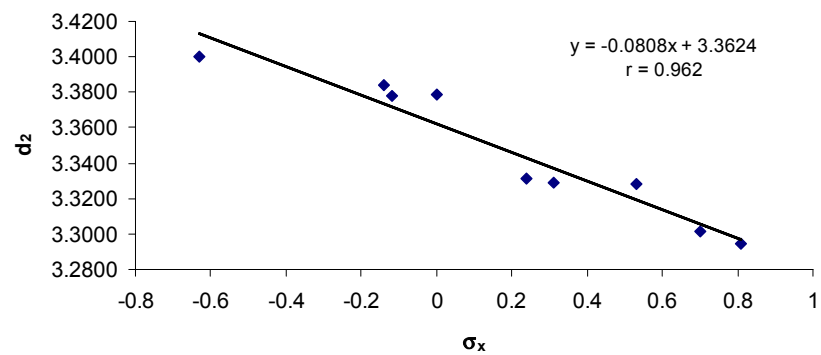

Table S1. Electronic parameters calculated for compounds **1**, **3**, **4**, **7**, and **9**.

| Comp.    | X                 | $q_o^a$ | $q_{Cl}^a$ | $F^b$<br>( $\times 10^{10}$ ) | $E^c$<br>( $\times 10^{20}$ ) | $\sigma_x^d$ |
|----------|-------------------|---------|------------|-------------------------------|-------------------------------|--------------|
| <b>1</b> | 4-NO <sub>2</sub> | -0.503  | 0.133      | -1.281                        | -4.447                        | 0.81         |
| <b>3</b> | 4-CN              | -0.503  | 0.129      | -1.256                        | -4.335                        | 0.70         |
| <b>4</b> | 4-CF <sub>3</sub> | -0.504  | 0.126      | -1.205                        | -4.201                        | 0.53         |
| <b>7</b> | 4-Cl              | -0.505  | 0.119      | -1.157                        | -4.005                        | 0.24         |
| <b>9</b> | 4-MeO             | -0.507  | 0.120      | -1.165                        | -4.044                        | -0.12        |

<sup>a</sup>In atomic units. <sup>b</sup>In Newtons. <sup>c</sup>In Joules. <sup>d</sup>Reference 11.

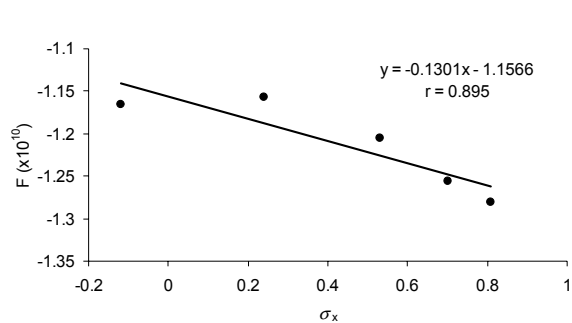

Fig. S7

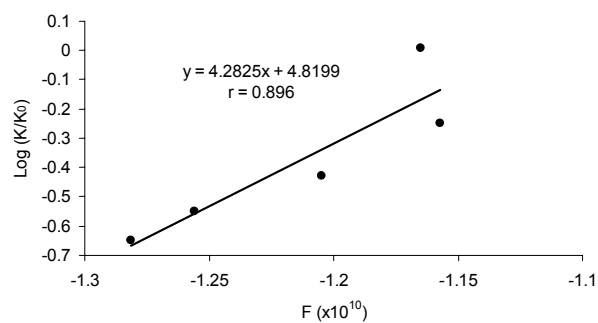

Fig. S8

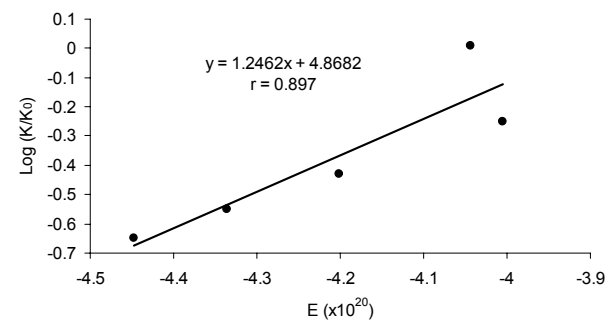

Fig. S9

## Experimental

### 1-(4-Cyanobenzylidene)amino-1-deoxy-D-glucitol (3a)

Method A (77%); mp 164-165°C;  $[\alpha]_{\text{D}}^{25} +3$ ;  $[\alpha]_{578}^{25} +5$ ;  $[\alpha]_{546}^{25} +7$  (*c* 0.5, pyridine); IR (KBr)  $\nu_{\text{max}}/\text{cm}^{-1}$  3500-3000 (OH), 1650 (C=N, arom), 1101, 1038, 1014 (C-O).  $^1\text{H}$  NMR (400 MHz, DMSO-*d*<sub>6</sub>)  $\delta$  8.40 (1H, s, CH=N), 7.92 (4H, s, H-arom), 4.73 (1H, d,  $J_{\text{C2,OH}} = 4.4$  Hz, OH-2), 4.51 (2H, m, OH), 4.36 (2H, m, OH), 3.88 (1H, s, H-2), 3.85 (1H, s, H-1), 3.71 (1H, t,  $J_{2,3} = J_{3,4} = 4.4$  Hz, H-3), 3.59 (2H, m, H-6', H-1'), 3.51 (2H, m, H-5, H-4), 3.41 (1H, dd,  $J_{6,\text{OH}} = 5.2$  Hz,  $J_{6,6'} = 11.2$  Hz, H-6').  $^{13}\text{C}$  NMR (100 MHz, DMSO-*d*<sub>6</sub>): 161.1 (C=N), 140.6, 133.1, 128.9, 119.1, 113.1 (C-arom), 72.7 (C-2), 72.3 (C-4), 72.0 (C-5), 70.4 (C-3), 64.1 (C-6), 64.0 (C-1). Anal. calcd. for C<sub>14</sub>H<sub>18</sub>N<sub>2</sub>O<sub>5</sub> (294.30): C, 57.13; H, 6.16; N, 9.52. Found: C, 57.40; H, 6.20; N, 9.46.

### 1-Deoxy-1-(4-trifluoromethylbenzylidene)amino-D-glucitol (4a)

Method A (74%); mp 152-153°C;  $[\alpha]_{\text{D}}^{22} +7$ ;  $[\alpha]_{578}^{22} +9$ ;  $[\alpha]_{546}^{22} 11$  (*c* 0.5, pyridine); IR (KBr)  $\nu_{\text{max}}/\text{cm}^{-1}$  3500-3100 (OH), 1649 (C=N), 1582 (arom), 1131, 1113, 1074 (C-O).  $^1\text{H}$  NMR (400 MHz, DMSO-*d*<sub>6</sub>)  $\delta$  8.41 (1H, s, CH=N), 7.95 (2H, d,  $J = 8.0$  Hz, H-arom), 7.81 (2H, d,  $J = 8.4$  Hz, H-arom), 4.73 (1H, d,  $J_{\text{C2,OH}} = 4.8$  Hz, OH-2), 4.52 (2H, d,  $J = 4.4$  Hz, OH), 4.36 (2H, m, OH), 3.86 (2H, m, H-2, H-1), 3.71 (1H, t,  $J_{2,3} = J_{3,4} = 4.8$  Hz, H-3), 3.57 (2H, m, H-6', H-1'), 3.52 (2H, m, H-5, H-4), 3.41 (1H, dd,  $J_{6,\text{OH}} = 5.4$  Hz,  $J_{6,6'} = 10.8$  Hz, H-6').  $^{13}\text{C}$  NMR (100 MHz, DMSO-*d*<sub>6</sub>): 161.2 (C=N), 142.9, 140.3, 130.8, 128.9, 126.0 (C-arom), 123.2 (CF<sub>3</sub>), 72.8 (C-2), 72.4 (C-4), 72.0 (C-5), 70.4 (C-3), 64.0 (C-6), 63.9 (C-1). Anal. calcd. for C<sub>14</sub>H<sub>18</sub>F<sub>3</sub>NO<sub>5</sub> (337.29): C, 49.85; H, 5.38; N, 4.15. Found: C, 49.60; H, 5.36; N, 4.08.

### (2*R*,5*S*)-3-Acetyl-2-(4-cyanophenyl)-5-(1,2,3,4-tetra-*O*-acetyl-D-arabino-tetrahydroxybutyl-1-yl)oxazolidine (3*E*,*Z*)

(92%). Recrystallized from ethanol, mp 151-152°C;  $[\alpha]_{\text{D}}^{23} -29$ ;  $[\alpha]_{578}^{23} -31$ ;  $[\alpha]_{546}^{23} -36$ ;  $[\alpha]_{436}^{23} -70$  (*c* 0.5, chloroform); IR (KBr)  $\nu_{\text{max}}/\text{cm}^{-1}$  1744 (C=O), 1663 (C=O, amide), 1214 (C-O-C, ester), 1083, 1033 (C-O);  $^1\text{H}$  NMR (400 MHz, CDCl<sub>3</sub>)  $\delta$  7.65 (4H, m, H-arom), 6.29 (1H, s, H-2<sub>Z</sub>), 6.04 (1H, s, H-2<sub>E</sub>), 5.40 (4H, m, H-1'<sub>E</sub>, H-2'<sub>E</sub>, H-1'<sub>Z</sub>, H-2'<sub>Z</sub>), 5.16 (1H, m, H-3'<sub>Z</sub>), 5.12 (1H, m, H-3'<sub>E</sub>), 4.31 (1H, dd,  $J_{4a,5} = 5.0$  Hz,  $J_{4b,5} = 10.2$  Hz, H-5<sub>Z</sub>), 4.27 (1H, dd,  $J_{3',4''} = 2.4$  Hz,  $J_{4',4''} = 9.6$  Hz, H-4'<sub>Z</sub>), 4.20 (1H, dd,  $J_{3',4''} = 4.0$  Hz,  $J_{4',4''} = 12.6$  Hz, H-4'<sub>Z</sub>), 4.33-4.13 (4H, m, H-4'<sub>E</sub>, H-4''<sub>E</sub>, H-5<sub>E</sub>, H-4<sub>a,E</sub>), 3.97 (1H, dd,  $J_{4a,5} = 5.8$  Hz,  $J_{4a,4b} = 10.2$  Hz, H-4<sub>a,Z</sub>), 3.36 (1H, t,  $J_{4b,4a} = J_{4b,5} = 10.2$  Hz, H-4<sub>b,Z</sub>), 3.22 (1H, t,  $J_{4b,4a} = J_{4b,5} = 9.6$  Hz, H-4<sub>b,E</sub>), 2.16-2.00 (9X3H, s, CH<sub>3</sub>), 1.81 (3H, s, CH<sub>3</sub>, AcN *E* isomer).  $^{13}\text{C}$  NMR (100 MHz, CDCl<sub>3</sub>): 170.5,

170.2, 169.8 (C=O), 168.4 (N-C=O), 143.7 (C-arom), 132.8 (2C, C-arom, *E*), 132.1 (2C, C-arom, *Z*), 127.8 (2C, C-arom, *Z*), 127.4 (2C, C-arom, *E*), 118.6 (C-arom), 112.6 (C-arom), 89.3 (C-2<sub>E</sub>), 88.3 (C-2<sub>Z</sub>), 77.3 (C-5<sub>E</sub>), 77.2 (C-5<sub>Z</sub>), 69.1 (C-2'<sub>E</sub>), 69.0 (C-2'<sub>Z</sub>), 68.8 (C-1'<sub>E</sub>), 68.7 (C-1'<sub>Z</sub>), 67.9 (C-3'<sub>Z</sub> and C-3'<sub>E</sub>), 61.5 (C-4'<sub>Z</sub> and C-4'<sub>E</sub>), 47.6 (C-4<sub>Z</sub>), 46.5 (C-4<sub>E</sub>), 23.2 (CH<sub>3</sub>, Ac-N *Z* isomer), 22.8 (CH<sub>3</sub>, Ac-N *E* isomer), 20.9, 20.8, 20.7, 20.6 (CH<sub>3</sub>, acetates). Anal. calcd. for C<sub>24</sub>H<sub>28</sub>N<sub>2</sub>O<sub>10</sub> (504.49): C, 57.14; H, 5.59; N, 5.55. Found: C, 57.08; H, 5.68; N, 5.38.

**(2*R*,5*S*)-3-Acetyl-2-(4-trifluoromethylphenyl)-5-(1,2,3,4-tetra-*O*-acetyl-*D*-arabino-tetrahydroxybutyl-1-yl)oxazolidine (4*E*,*Z*)**

(50%); Recrystallized from ethanol, mp 159-160°C;  $[\alpha]_{\text{D}}^{24}$  -15;  $[\alpha]_{578}^{24}$  -17;  $[\alpha]_{546}^{24}$  -19;  $[\alpha]_{436}^{24}$  -40; (*c* 0.5, chloroform); IR (KBr)  $\nu_{\text{max}}/\text{cm}^{-1}$  1750 (C=O), 1655 (C=O, amide), 1228 (C-O-C, ester), 1110, 1066, 1030 (C-O); <sup>1</sup>H NMR (400 MHz, CDCl<sub>3</sub>)  $\delta$  7.69 (1H, d, *J* = 8.0 Hz, H-arom), 7.62 (2H, m, H-arom), 7.48 (1H, m, *J* = 7.6 Hz, H-arom), 6.30 (1H, s, H-2<sub>Z</sub>), 6.04 (1H, s, H-2<sub>E</sub>), 5.43 (1H, m, H-2'<sub>E</sub>), 5.42 (1H, m, H-2'<sub>Z</sub>), 5.40 (1H, m, H-1'<sub>Z</sub>), 5.31 (1H, m, H-1'<sub>E</sub>), 5.15 (1H, m, H-3'<sub>E</sub>), 5.09 (1H, m, H-3'<sub>Z</sub>), 4.40-4.16 (7H, m, H-5<sub>Z</sub>, H-5<sub>E</sub>, H-4<sub>a,E</sub>, H-4'<sub>Z</sub>, H-4'<sub>E</sub>, H-4''<sub>Z</sub>, H-4''<sub>E</sub>), 3.95 (1H, dd, *J*<sub>4a,4b</sub> = 10.2 Hz, *J*<sub>4a,5</sub> = 5.8 Hz, H-4<sub>a,Z</sub>), 3.37 (1H, t, *J*<sub>4b,4a</sub>=*J*<sub>4b,5</sub> = 10.2 Hz, H-4<sub>b,Z</sub>), 3.23 (1H, t, *J*<sub>4b,4a</sub>=*J*<sub>4b,5</sub> = 10.2 Hz, H-4<sub>b,E</sub>), 2.10, 2.09, 2.07, 2.00 (9x3H, s, CH<sub>3</sub>), 1.79 (3H, s, CH<sub>3</sub>, AcN *E* isomer). <sup>13</sup>C NMR (100 MHz, CDCl<sub>3</sub>): 170.6, 170.3, 170.2, 169.8 (C=O), 168.3 (N-C=O, *Z*), 168.0 (N-C=O, *E*), 142.6 (C-arom, *Z*), 142.1 (C-arom, *E*), 130.8, 127.4, 126.0, 125.2 (C-arom, *Z* and *E*), 89.5 (C-2<sub>E</sub>), 88.5 (C-2<sub>Z</sub>), 77.3 (C-5<sub>Z</sub> and C-5<sub>E</sub>), 69.1 (C-2'<sub>E</sub>), 69.0 (C-2'<sub>Z</sub>), 68.6 (C-1'<sub>Z</sub>), 68.5 (C-1'<sub>E</sub>), 68.1 (C-3'<sub>E</sub>), 68.0 (C-3'<sub>Z</sub>), 61.5 (C-4'<sub>Z</sub> and C-4'<sub>E</sub>), 47.6 (C-4<sub>Z</sub>), 46.5 (C-4<sub>E</sub>), 23.3 (CH<sub>3</sub>, Ac-N *Z* isomer), 22.8 (CH<sub>3</sub>, Ac-N *E* isomer), 20.9, 20.8, 20.7, 20.6 (CH<sub>3</sub>, acetates). Anal. calcd. for C<sub>24</sub>H<sub>28</sub>NO<sub>10</sub> (547.48): C, 52.65; H, 5.15; N, 2.56. Found: C, 52.52; H, 5.30; N, 2.62.

**(2*R*,5*S*)-3-Acetyl-2-(4-cyanophenyl)-5-(*D*-arabino-tetrahydroxybutyl-1-yl)oxazolidine (27*E*,*Z*)**

(90%); Recrystallized from ethanol, mp 171-172°C;  $[\alpha]_{\text{D}}^{22}$  -20;  $[\alpha]_{578}^{22}$  -21;  $[\alpha]_{546}^{22}$  -25;  $[\alpha]_{436}^{22}$  -50; (*c* 0.5, pyridine); IR (KBr)  $\nu_{\text{max}}/\text{cm}^{-1}$  3400-3200 (OH), 1636 (C=O, arom), 1208 (C-N), 1115, 1075 (C-O); <sup>1</sup>H NMR (400 MHz, CDCl<sub>3</sub>)  $\delta$  7.91 (2H, d, *J* = 8.0 Hz, H-arom, *E*), 7.83 (2H, d, *J* = 8.0 Hz, H-arom, *Z*), 7.67 (2H, d, *J* = 8.0 Hz, H-arom, *E*), 7.62 (2H, d, *J* = 8.0 Hz, H-arom, *Z*), 6.22 (1H, s, H-2<sub>E</sub>), 6.04 (1H, s, H-2<sub>Z</sub>), 4.83 (1H, d, *J*<sub>OH,1</sub> = 6.8 Hz, OH-1<sub>Z</sub>), 4.76 (1H, d, *J*<sub>OH,1</sub> = 6.8 Hz, OH-1<sub>E</sub>), 4.57 (1H, d, *J* = 7.2 Hz, OH, *E*), 4.53 (1H, d, *J* = 5.6 Hz, OH, *Z*), 4.51 (1H, d, *J* = 7.6 Hz, OH, *Z*), 4.48 (1H, d, *J* = 6.0 Hz, OH, *E*), 4.39 (1H, t, *J* = 5.6 Hz, OH-4<sub>Z</sub>), 4.36 (1H, m, OH-4<sub>E</sub>), 4.26 (1H, dt, *J*<sub>4a,5</sub> = 10.0 Hz, *J*<sub>5,1'</sub>=*J*<sub>4b,5</sub> = 6.8 Hz, H-5<sub>Z</sub>), 4.15 (2H, m, H-5<sub>E</sub> and H-4<sub>a,Z</sub>), 3.96 (1H, dd, *J*<sub>4a,5</sub> = 5.6 Hz, *J*<sub>4a,4b</sub> = 9.6 Hz, H-4<sub>a,E</sub>), 3.81 (1H, t, *J*<sub>1',5</sub> = 6.8 Hz, *J*<sub>1',2'</sub> = 0 Hz, H-1'<sub>Z</sub>), 3.76 (1H, t, *J*<sub>1',5</sub> = 6.0 Hz, *J*<sub>1',2'</sub> = 0 Hz, H-1'<sub>E</sub>), 3.61 (2H, m, H-4'<sub>Z</sub> and H-4'<sub>E</sub>), 3.51 (2H, m, H-3'<sub>Z</sub> and H-3'<sub>E</sub>), 3.44 (4H, m, *J*<sub>4',4''</sub> = 10.8 Hz, *J*<sub>4,OH</sub> = 5.2 Hz, H-4''<sub>Z</sub> and H-4''<sub>E</sub>, H-2'<sub>Z</sub>, H-2'<sub>E</sub>), 3.25 (1H, t, *J*<sub>4a,4b</sub>=*J*<sub>4b,5</sub> = 8.0 Hz, H-4<sub>b,Z</sub>), 3.19 (1H, t, *J*<sub>4a,4b</sub>=*J*<sub>4b,5</sub> = 12.0 Hz, H-4<sub>b,E</sub>), 2.02 (3H, s, CH<sub>3</sub>, *Z*), 1.63 (3H, s, CH<sub>3</sub>, *E*). <sup>13</sup>C NMR (100 MHz, CDCl<sub>3</sub>): 168.1 (C=O, *Z*), 167.5 (C=O, *E*), 145.6, 133.3, 132.6, 128.9, 128.7, 119.2, 112.4, 111.6 (C-arom), 88.8 (C-2<sub>E</sub>), 88.6 (C-2<sub>Z</sub>), 81.3 (C-5<sub>Z</sub>), 80.7 (C-5<sub>E</sub>), 71.7, 71.6, 71.3, 71.1, 70.9 (C-1'<sub>Z</sub> and C-1'<sub>E</sub>, C-2'<sub>Z</sub> and C-2'<sub>E</sub>, C-3'<sub>Z</sub> and C-3'<sub>E</sub>), 63.8 (C-4'<sub>Z</sub>), 63.7 (C-4'<sub>E</sub>), 48.3 (C-4<sub>E</sub>), 47.1 (C-4<sub>Z</sub>), 23.5 (CH<sub>3</sub>, *Z*), 23.0 (CH<sub>3</sub>, *E*). Anal. calcd. for C<sub>16</sub>H<sub>20</sub>N<sub>2</sub>O<sub>6</sub> (336.34): C, 57.14; H, 5.99; N, 8.33. Found: C, 57.11; H, 6.04; N, 8.56.

**(2R,5S)-3-Acetyl-2-(4-trifluoromethylphenyl)-5-(D-arabino-tetrahydroxybutyl-1-yl)oxazolidine (28E,Z)**

(88%); Recrystallized from ethanol, mp 170-171°C;  $[\alpha]_{\text{D}}^{22}$  -19;  $[\alpha]_{578}^{22}$  -21;  $[\alpha]_{546}^{22}$  -25;  $[\alpha]_{436}^{22}$  -48.2 (*c* 0.5, pyridine); IR (KBr)  $\nu_{\text{max}}/\text{cm}^{-1}$  3600-3300 (OH), 1662 (C=O), 1619 (arom), 1211 (C-N), 1109, 1067, 1050 (C-O);  $^1\text{H}$  NMR (400 MHz,  $\text{CDCl}_3$ )  $\delta$  7.81 (2H, d,  $J = 8.0$  Hz, H-arom, *E*), 7.72 (2H, d,  $J = 8.4$  Hz, H-arom, *Z*), 7.69 (2H, d, H-arom, *E*), 7.64 (2H, d,  $J = 8.0$  Hz, H-arom, *Z*), 6.23 (1H, s, H-2<sub>E</sub>), 6.05 (1H, s, H-2<sub>Z</sub>), 4.81 (1H, d,  $J_{\text{OH},1} = 6.4$  Hz, OH-1<sub>Z</sub>), 4.74 (1H, d,  $J_{\text{OH},1} = 6.8$  Hz, OH-1<sub>E</sub>), 4.57 (1H, d,  $J = 7.6$  Hz, OH, *E*), 4.54 (1H, d,  $J = 5.6$  Hz, OH, *Z*), 4.51 (1H, d,  $J = 7.6$  Hz, OH, *Z*), 4.48 (1H, d,  $J = 5.6$  Hz, OH, *E*), 4.39 (1H, t,  $J = 5.6$  Hz, OH-4<sub>Z</sub>), 4.37 (1H, m, OH-4<sub>E</sub>), 4.27 (1H, m,  $J_{4a,5} = 10.0$  Hz,  $J_{5,1'} = J_{4b,5} = 6.4$  Hz, H-5<sub>Z</sub>), 4.14 (2H, m, H-5<sub>E</sub> and H-4<sub>a,E</sub>), 3.97 (1H, dd,  $J_{4a,5} = 5.6$  Hz,  $J_{4a,4b} = 9.6$  Hz, H-4<sub>a,Z</sub>), 3.82 (1H, t,  $J_{1',5} = 7.2$  Hz,  $J_{1',2'} = 0$  Hz, H-1'<sub>Z</sub>), 3.77 (1H, t,  $J_{1',5} = 6.8$  Hz,  $J_{1',2'} = 0$  Hz, H-1'<sub>E</sub>), 3.61 (2H, m, H-4'<sub>Z</sub> and H-4'<sub>E</sub>), 3.52 (2H, m, H-3'<sub>Z</sub> and H-3'<sub>E</sub>), 3.44 (4H, m,  $J_{4',4''} = 10.8$  Hz,  $J_{4'',\text{OH}} = 5.2$  Hz, H-4'<sub>Z</sub> and H-4'<sub>E</sub>, H-2'<sub>Z</sub>, H-2'<sub>E</sub>), 3.25 (1H, t,  $J_{4b,4a} = J_{4b,5} = 8.0$  Hz, H-4<sub>b,Z</sub>), 3.19 (1H, t,  $J_{4a,4b} = J_{4b,5} = 12.0$  Hz, H-4<sub>b,E</sub>), 2.02 (3H, s, CH<sub>3</sub>, *Z*), 1.64 (3H, s, CH<sub>3</sub>, *E*).  $^{13}\text{C}$  NMR (100 MHz,  $\text{CDCl}_3$ ): 168.1 (C=O, *Z*), 167.5 (C=O, *E*), 144.9, 129.5, 128.8, 128.5, 126.2, 126.1, 125.4, 123.3 (C-arom), 88.9 (C-2<sub>E</sub>), 88.7 (C-2<sub>Z</sub>), 81.2 (C-5<sub>Z</sub>), 80.6 (C-5<sub>E</sub>), 71.7, 71.6, 71.3, 71.1, 70.9 (C-1'<sub>Z</sub> and C-1'<sub>E</sub>, C-2'<sub>Z</sub> and C-2'<sub>E</sub>, C-3'<sub>Z</sub> and C-3'<sub>E</sub>), 63.8 (C-4'<sub>Z</sub>), 63.7 (C-4'<sub>E</sub>), 48.3 (C-4<sub>Z</sub>), 47.2 (C-4<sub>E</sub>), 23.5 (CH<sub>3</sub>, *Z*), 23.0 (CH<sub>3</sub>, *E*). Anal. calcd. for C<sub>16</sub>H<sub>20</sub>F<sub>3</sub>NO<sub>6</sub> (379.33): C, 50.66; H, 5.31; N, 3.69. Found: C, 50.45; H, 5.36; N, 3.57.

**(2R,5S)-3-Acetyl-2-(4-dimethylaminophenyl)-5-(D-arabino-tetrahydroxybutyl-1-yl)oxazolidine (35E,Z)**

(70%); Recrystallized from ethanol, mp 183-184°C;  $[\alpha]_{\text{D}}^{22}$  -22;  $[\alpha]_{578}^{22}$  -28;  $[\alpha]_{546}^{22}$  -28 (*c* 0.5, pyridine); IR (KBr)  $\nu_{\text{max}}/\text{cm}^{-1}$  3500-2900 (OH), 1615 (C=O), 1530 (arom), 1200 (C-N), 1099, 1077, 1037 (C-O);  $^1\text{H}$  NMR (400 MHz,  $\text{CDCl}_3$ )  $\delta$  7.21 (4H, t,  $J = 9.2$  Hz, H-arom), 6.72 (2H, d,  $J = 8.4$  Hz), 6.66 (2H, d,  $J = 8.4$  Hz, H-arom), 5.95 (1H, s, H-2<sub>E</sub>), 5.88 (1H, s, H-2<sub>Z</sub>), 4.75 (1H, d,  $J_{\text{OH},1} = 6.4$  Hz, OH-1<sub>Z</sub>), 4.70 (1H, d,  $J_{\text{OH},1} = 6.8$  Hz, OH-1<sub>E</sub>), 4.53 (2H, d, OH), 4.48 (2H, m, OH), 4.37 (2H, c,  $J_{\text{OH},4} = 5.2$  Hz, OH-4<sub>Z</sub> and OH-4<sub>E</sub>), 4.11 (1H, dt,  $J_{4a,5} = 10.0$  Hz,  $J_{5,1'} = J_{4b,5} = 6.0$  Hz, H-5<sub>Z</sub>), 4.06 (2H, m, H-5<sub>E</sub> and H-4<sub>a,Z</sub>), 3.90 (1H, dd,  $J_{4a,5} = 5.4$  Hz,  $J_{4a,4b} = 9.4$  Hz, H-4<sub>a,E</sub>), 3.80 (2H, c,  $J_{1',5} = 7.6$  Hz,  $J_{1',2'} = 0$  Hz, H-1'<sub>Z</sub> and H-1'<sub>E</sub>), 3.60 (2H, m, H-4'<sub>Z</sub> and H-4'<sub>E</sub>), 3.49 (2H, m, H-3'<sub>Z</sub> and H-3'<sub>E</sub>), 3.44 (2H, dd,  $J_{4',4''} = 8.0$  Hz,  $J_{4'',\text{OH}} = 3.2$  Hz, H-4'<sub>Z</sub> and H-4'<sub>E</sub>), 3.23 (2H, t,  $J_{2',\text{OH}} = J_{2',3'} = 7.6$  Hz, H-2'<sub>Z</sub> and H-2'<sub>E</sub>), 3.13 (2H, t, H-4<sub>b,E</sub> and H-4<sub>b,Z</sub>), 2.91 (3H, s, CH<sub>3</sub>-N, *E*), 2.88 (3H, s, CH<sub>3</sub>-N, *Z*), 1.98 (3H, s, CH<sub>3</sub>, *Z*), 1.58 (3H, s, CH<sub>3</sub>, *E*).  $^{13}\text{C}$  NMR (100 MHz,  $\text{CDCl}_3$ ): 167.5 (C=O), 151.3, 150.9, 128.7, 128.4, 128.2, 127.1, 112.3, 112.1 (C-arom), 90.1 (C-2<sub>E</sub>), 89.5 (C-2<sub>Z</sub>), 80.3 (C-5<sub>Z</sub>), 79.66 (C-5<sub>E</sub>), 71.7, 71.6, 71.3, 71.2, 71.0 (C-1'<sub>Z</sub> and C-1'<sub>E</sub>, C-2'<sub>Z</sub> and C-2'<sub>E</sub>, C-3'<sub>Z</sub> and C-3'<sub>E</sub>), 63.8 (C-4'<sub>Z</sub> and C-4'<sub>E</sub>), 48.4 (C-4<sub>E</sub>), 47.4 (C-4<sub>Z</sub>), 40.7 (CH<sub>3</sub>-N, *Z*), 40.5 (CH<sub>3</sub>-N, *E*), 23.7 (CH<sub>3</sub>, *Z*), 22.9 (CH<sub>3</sub>, *E*). Anal. calcd. for C<sub>17</sub>H<sub>26</sub>N<sub>2</sub>O<sub>6</sub> (354.40): C, 57.61; H, 7.39; N, 7.90. Found: C, 57.46; H, 7.45; N, 7.78.

<sup>1</sup>H-NMR Spectrum for 1-deoxy-1-(3-nitrobenzylidene)amino-D-glucitol (**2a**)

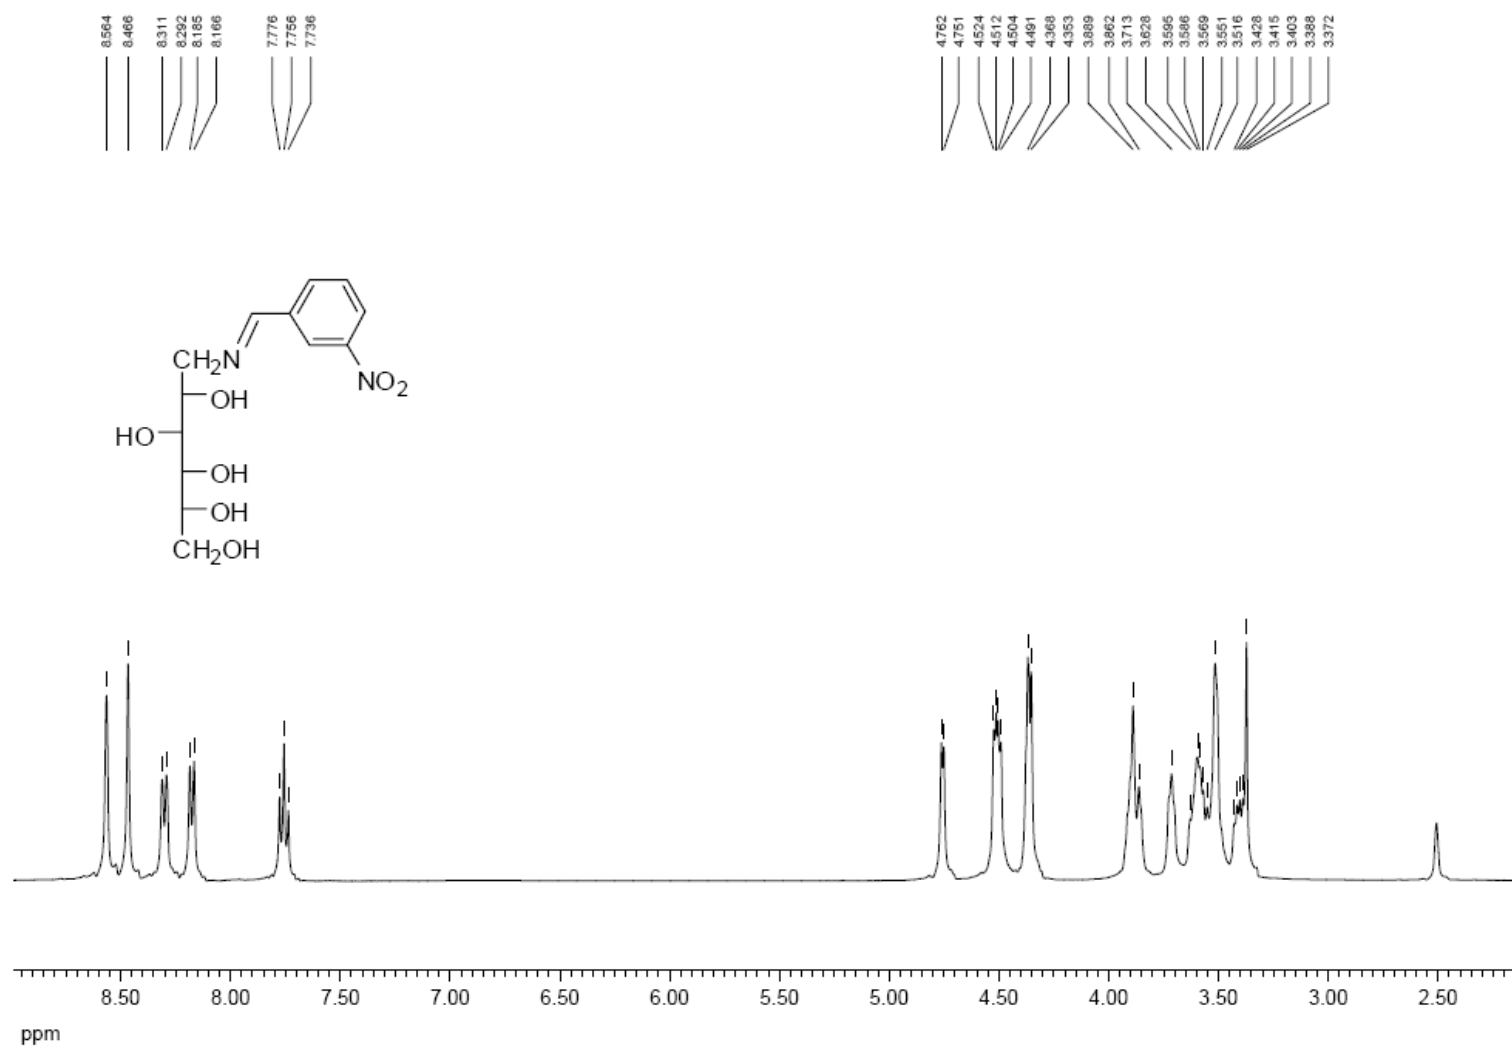



$^{13}\text{C}$ -NMR Spectrum for 1-deoxy-1-(3-nitrobenzylidene)amino-D-glucitol (**2a**)

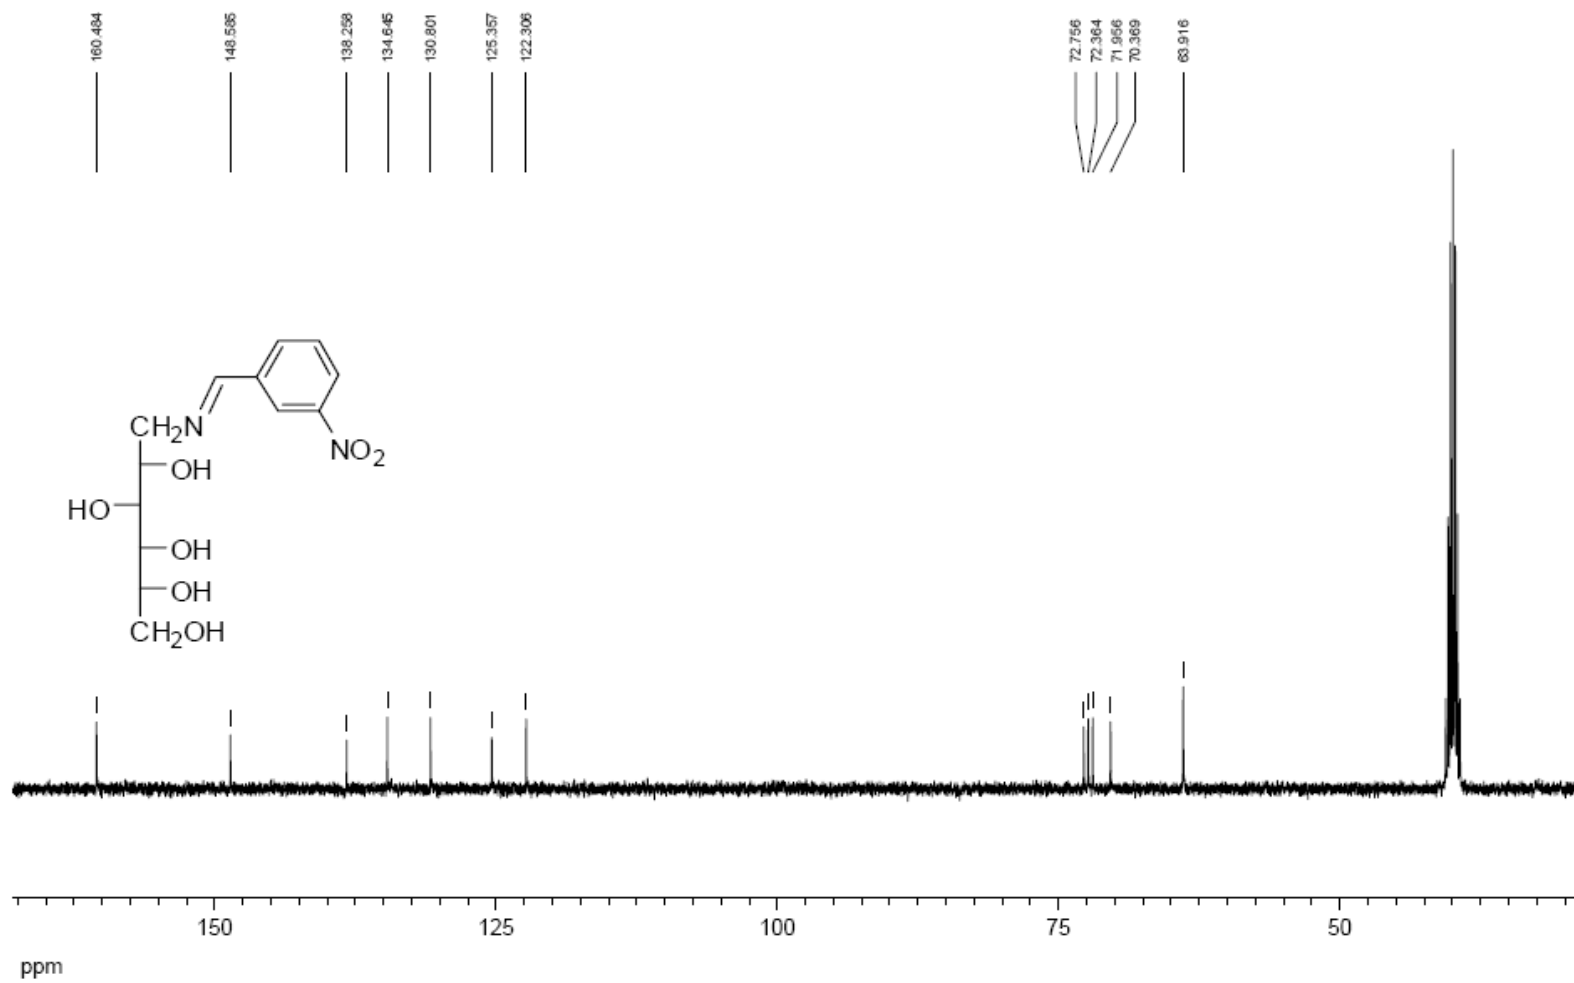

<sup>1</sup>H-NMR Spectrum for 1-deoxy-1-(4-cyanobenzylidene)amino-D-glucitol (**3a**)

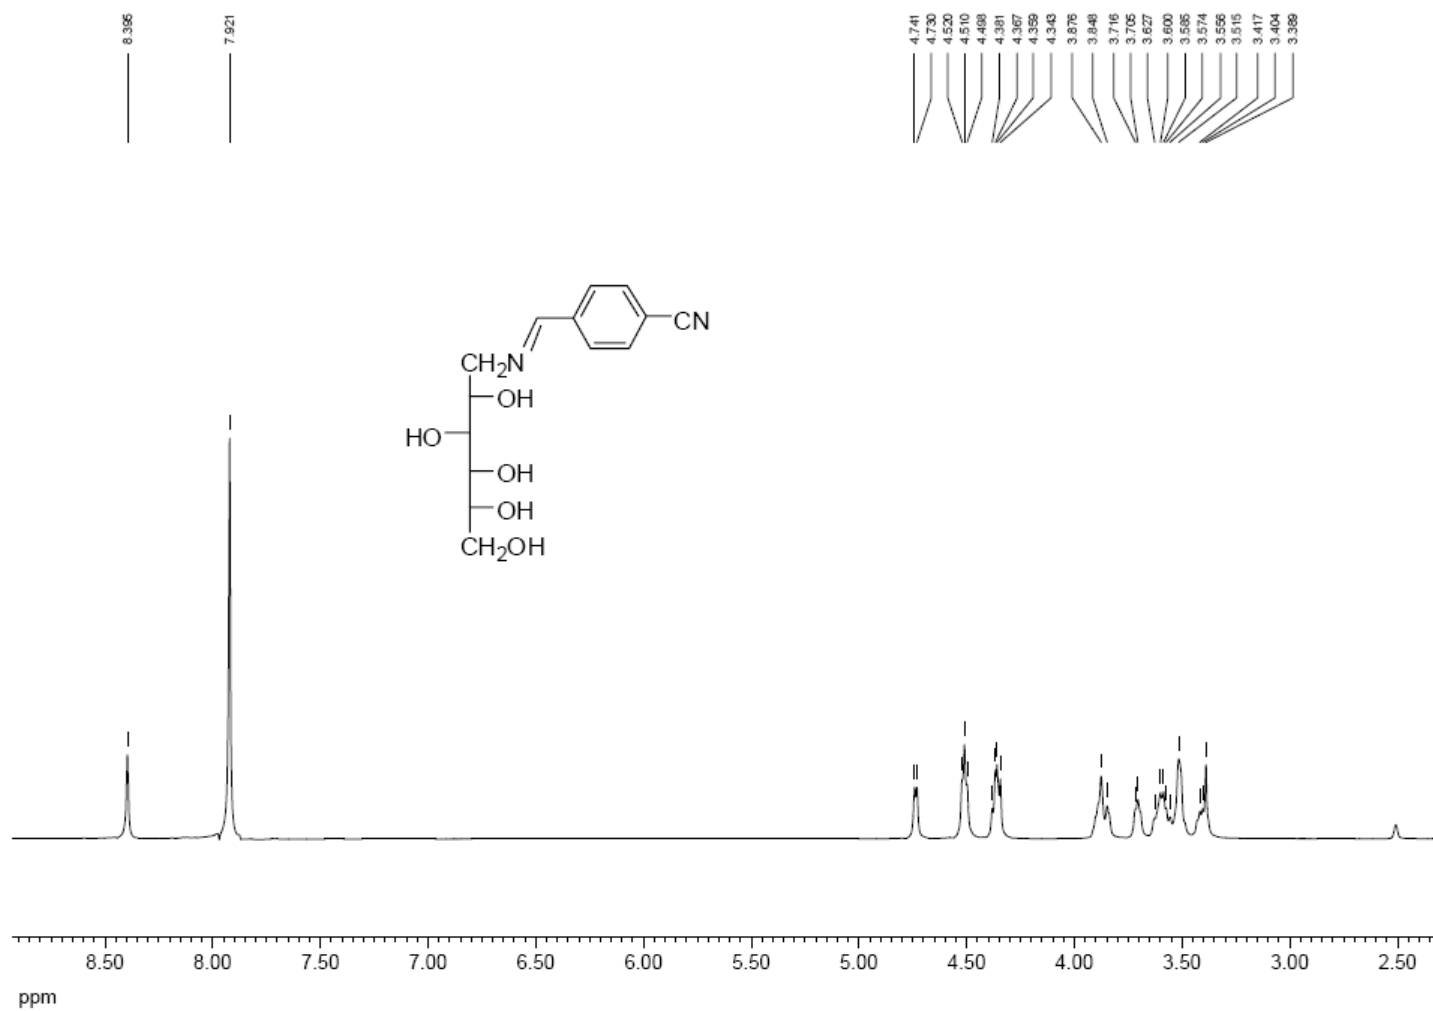

<sup>13</sup>C-NMR Spectrum for 1-deoxy-1-(4-cyanobenzylidene)amino-D-glucitol (**3a**)

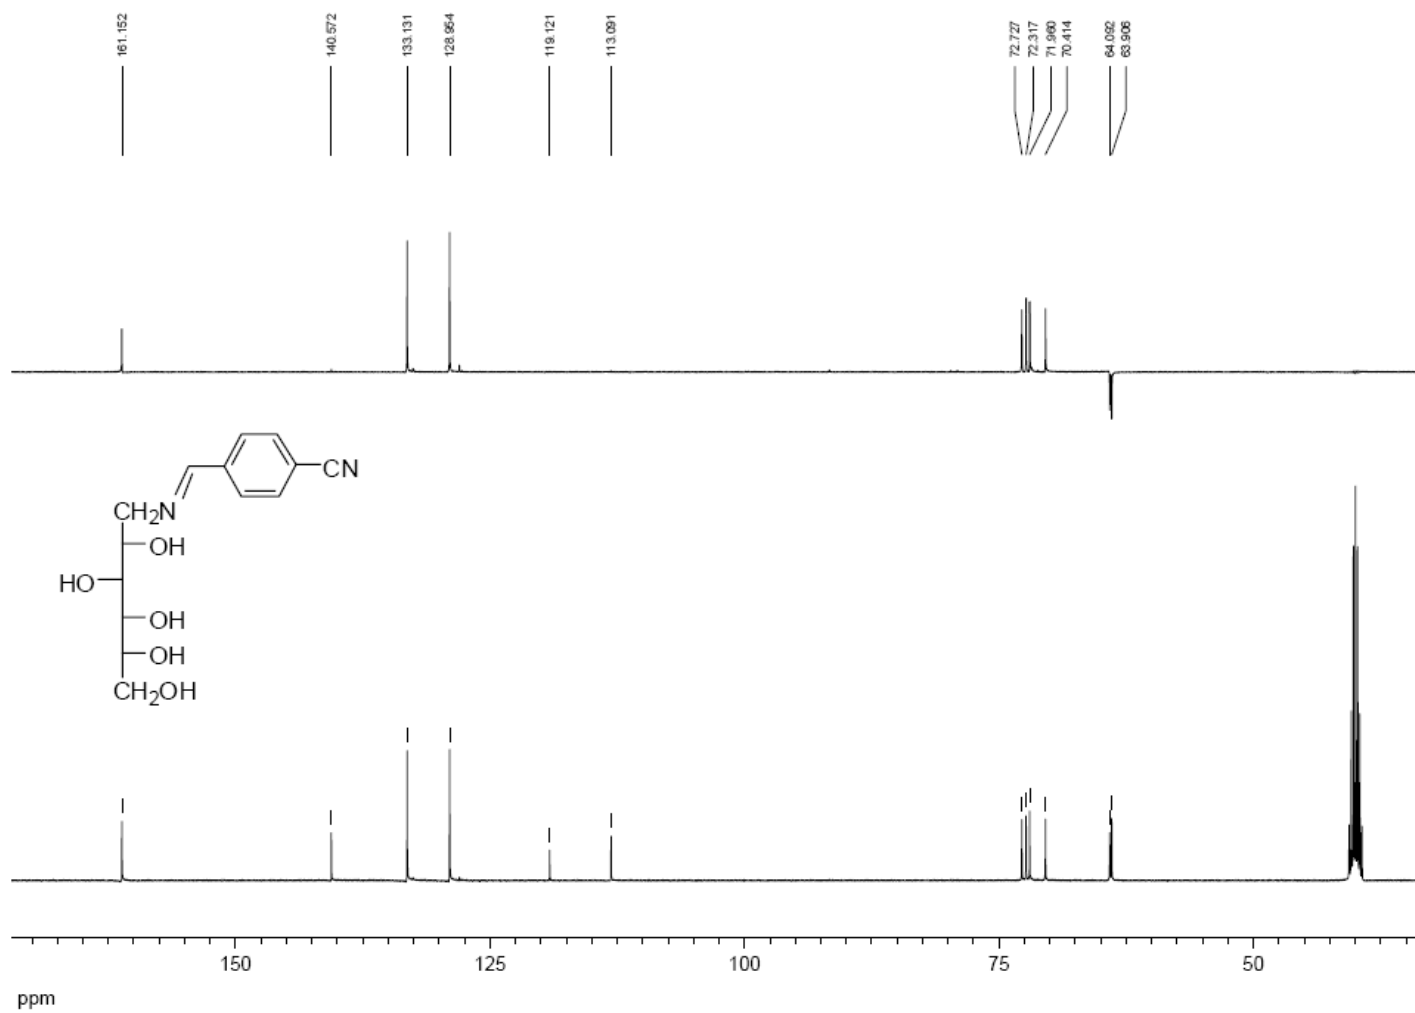

<sup>1</sup>H-NMR Spectrum for 1-deoxy-1-(4-trifluoromethylbenzylidene)amino-D-glucitol (**4a**)

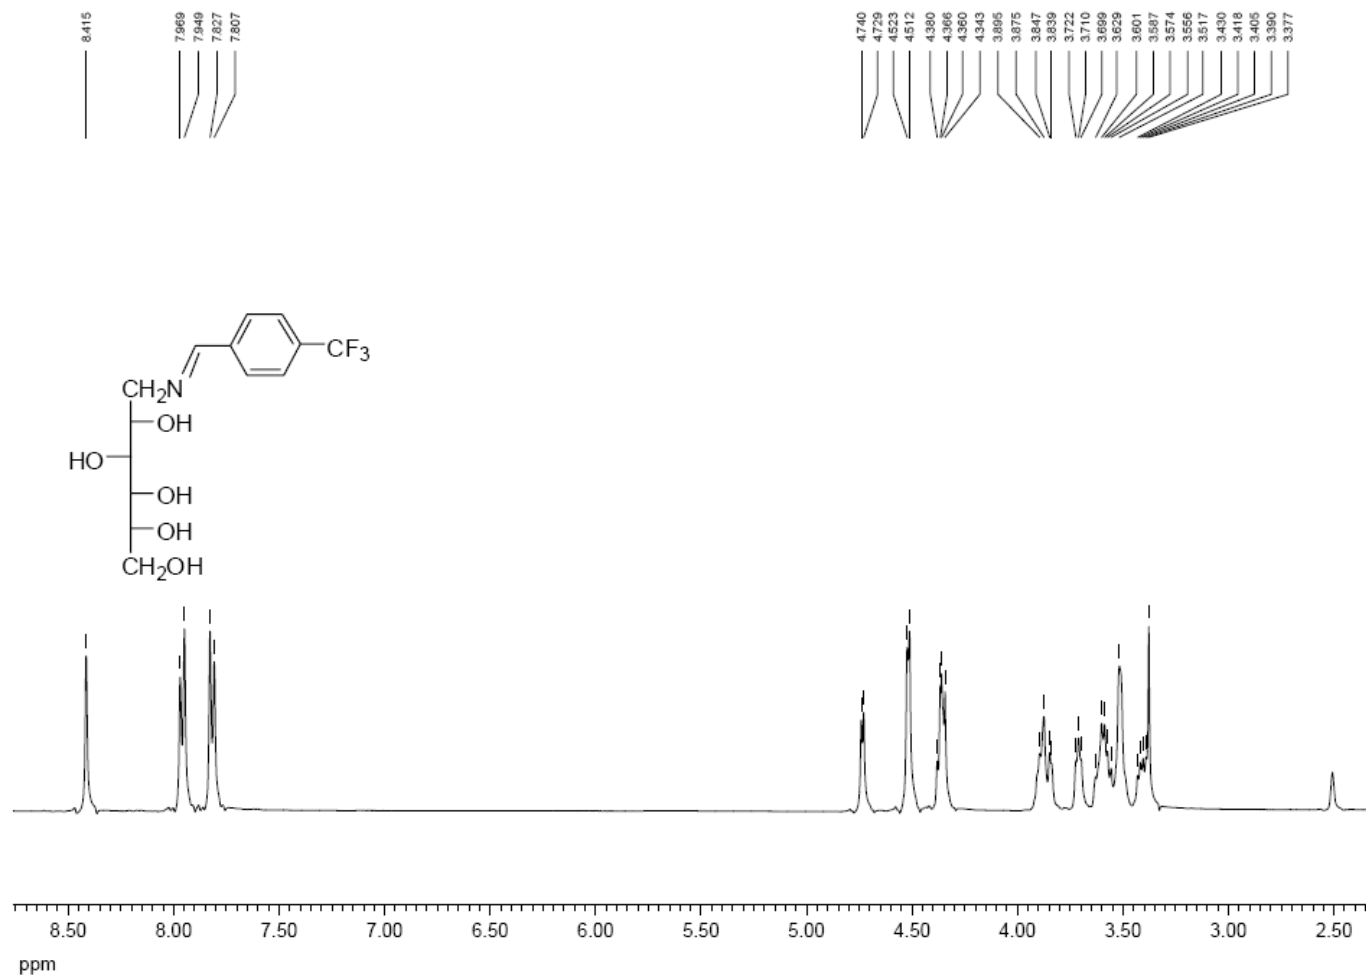

$^{13}\text{C}$ -NMR Spectrum for 1-deoxy-1-(4-trifluoromethylbenzylidene)amino-D-glucitol (**4a**)

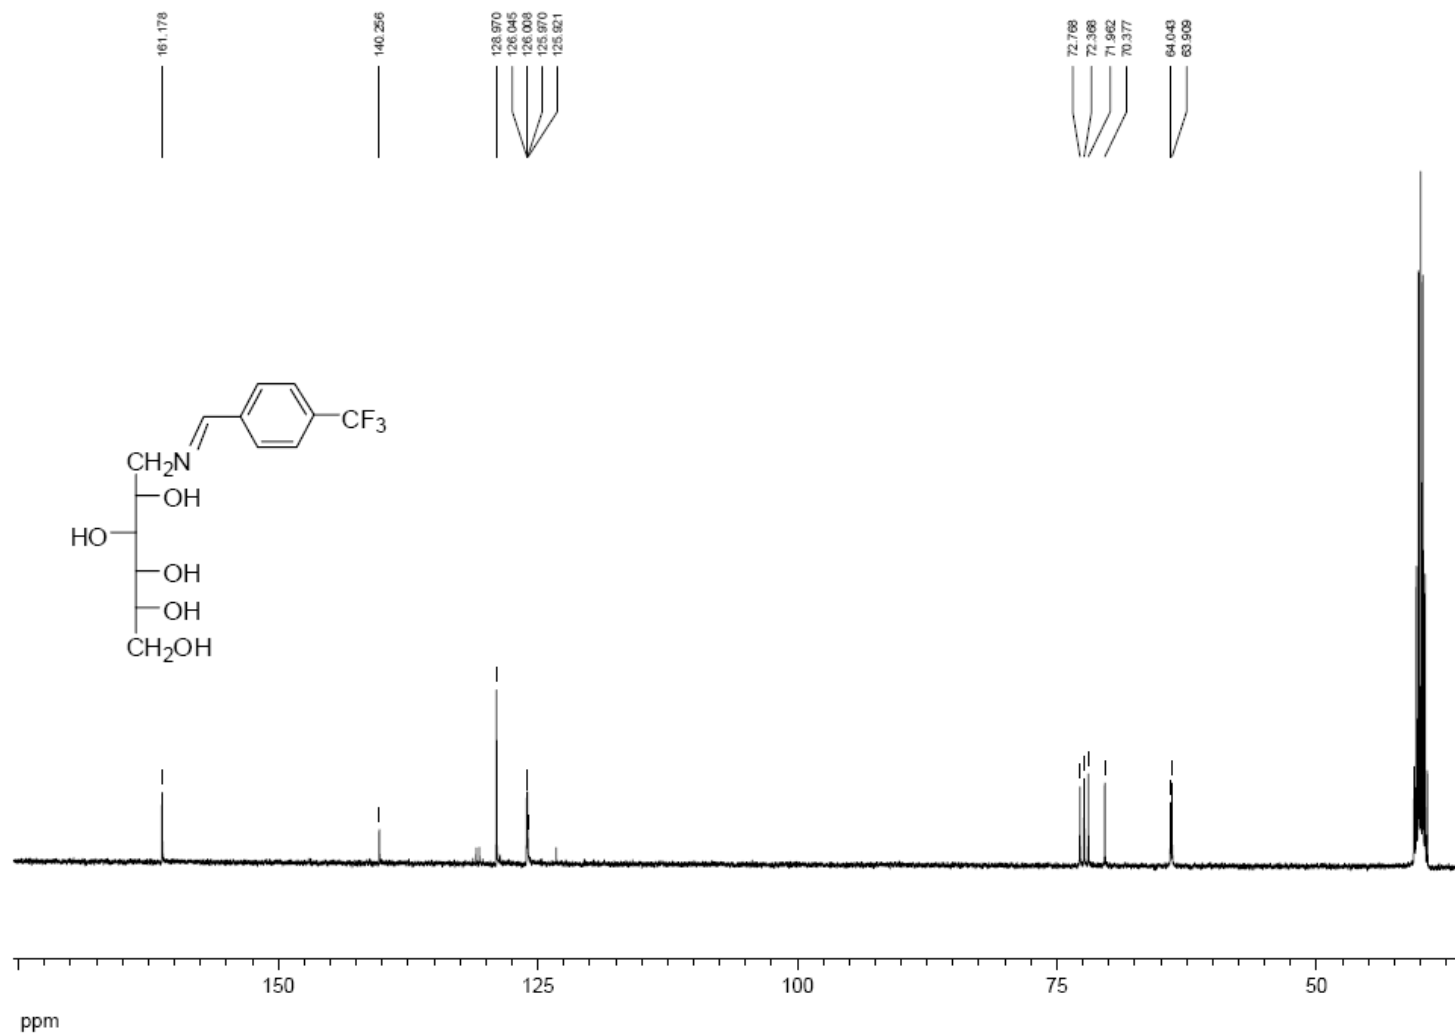

<sup>1</sup>H-NMR Spectrum for 1-(4-dimethylaminobenzylidene)amino-1-deoxy-1-D-glucitol (**37**)

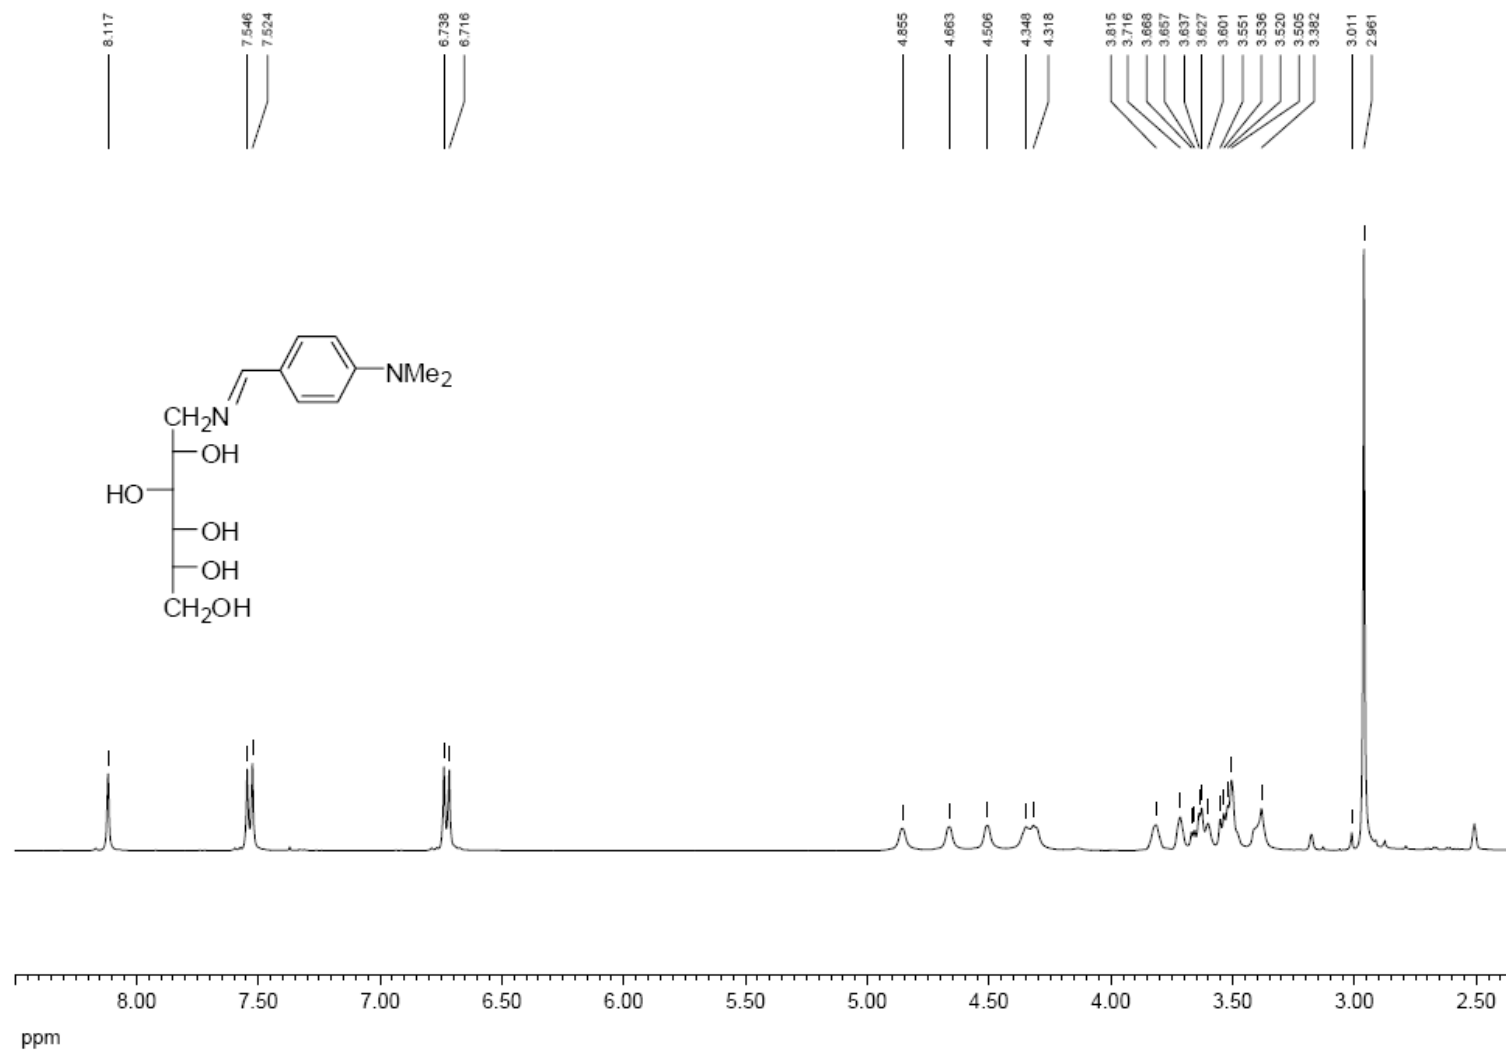

<sup>13</sup>C-NMR Spectrum for 1-(4-dimethylaminobenzylidene)amino-1-deoxy-1-D-glucitol (**37**)

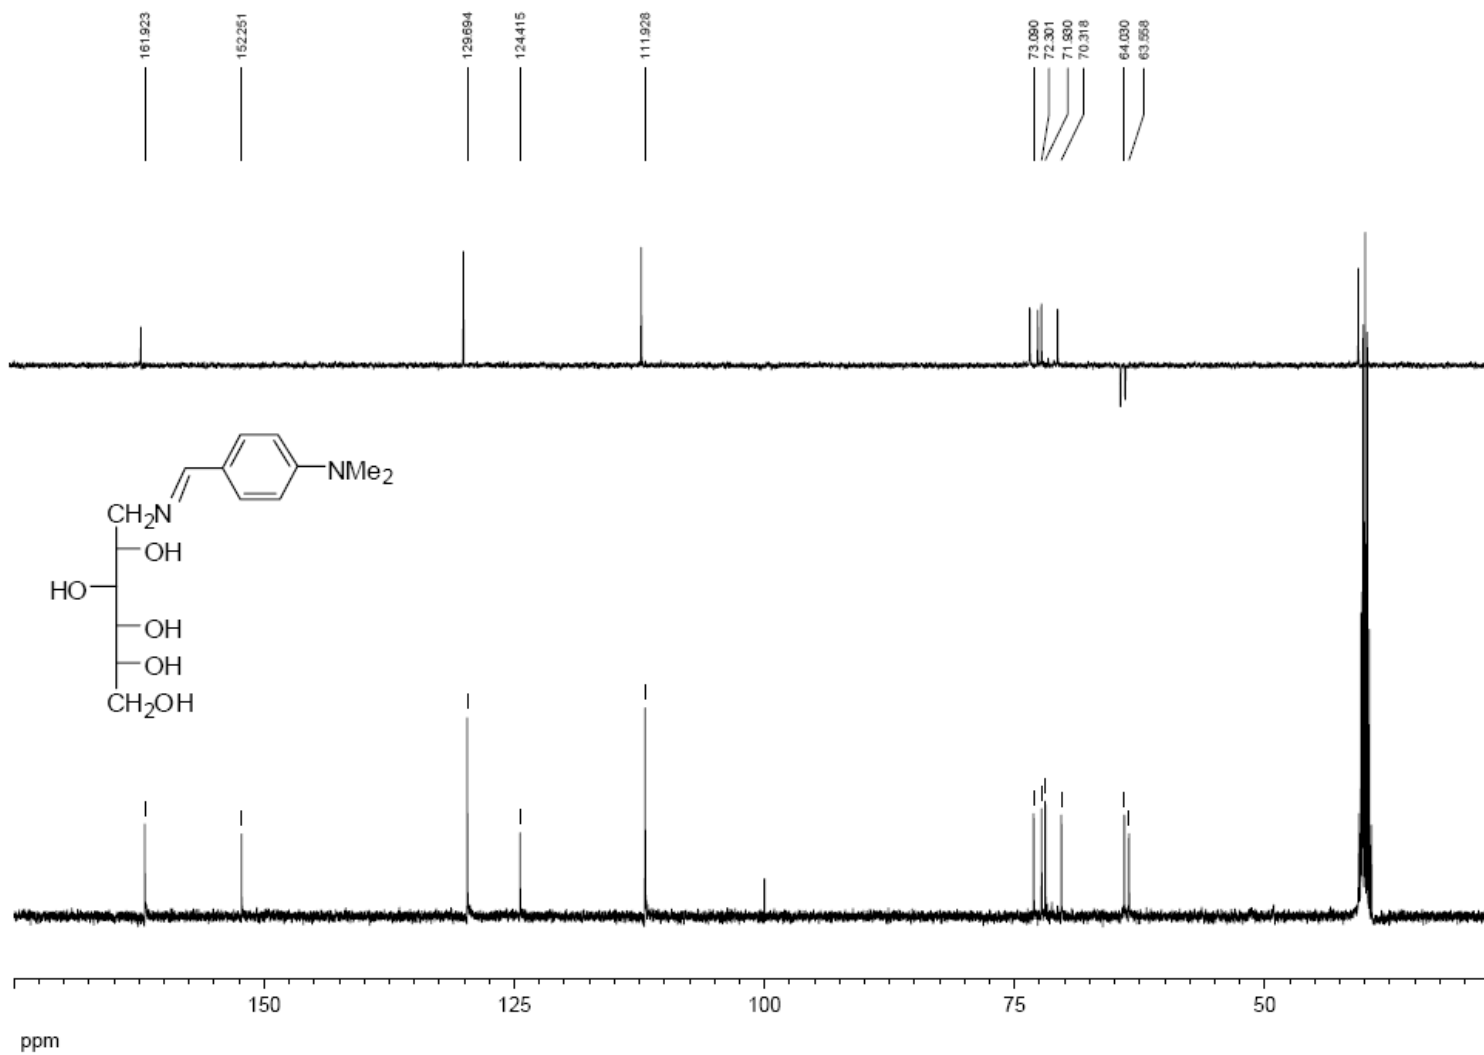

<sup>1</sup>H-NMR Spectrum for (2*R*, 5*S*)-3-acetyl-2-(3-nitrophenyl)-5-(1,2,3,4-tetra-*O*-acetyl-*D*-arabino-tetrahydrobutyl-1-yl)oxazolidine (**2E,Z**)

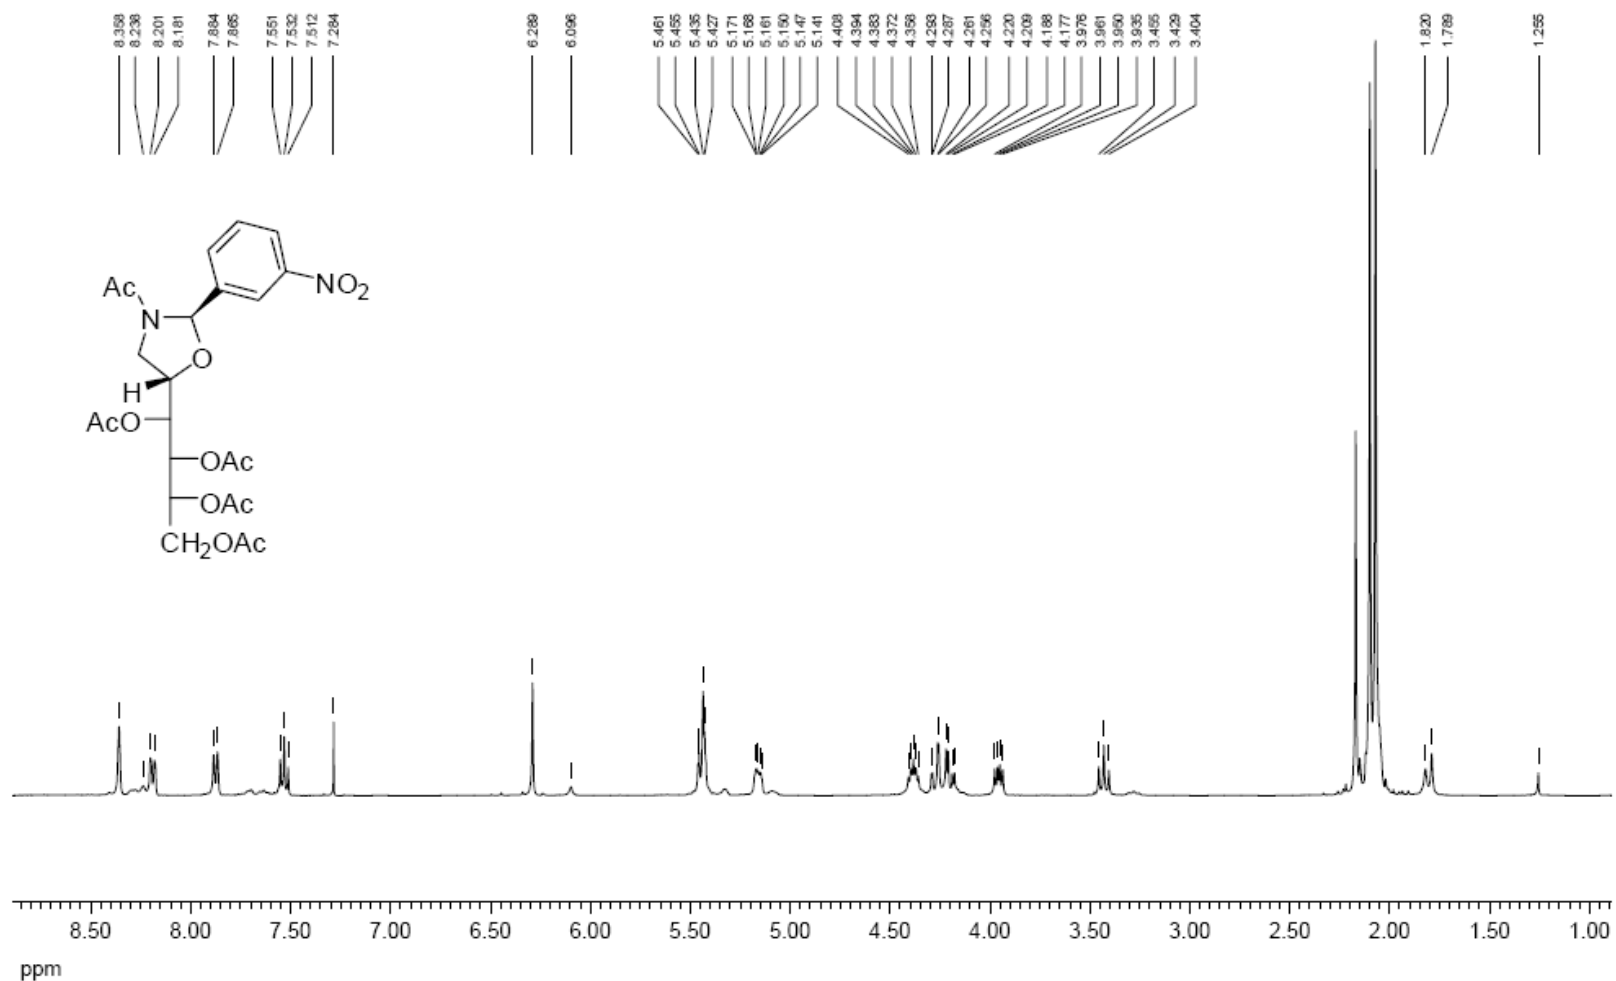



$^{13}\text{C}$ -NMR Spectrum for (2*R*, 5*S*)-3-acetyl-2-(3-nitrophenyl)-5-(1,2,3,4-tetra-*O*-acetyl-*D*-arabino-tetrahydroxybutyl-1-yl)oxazolidine (2*E*,*Z*)

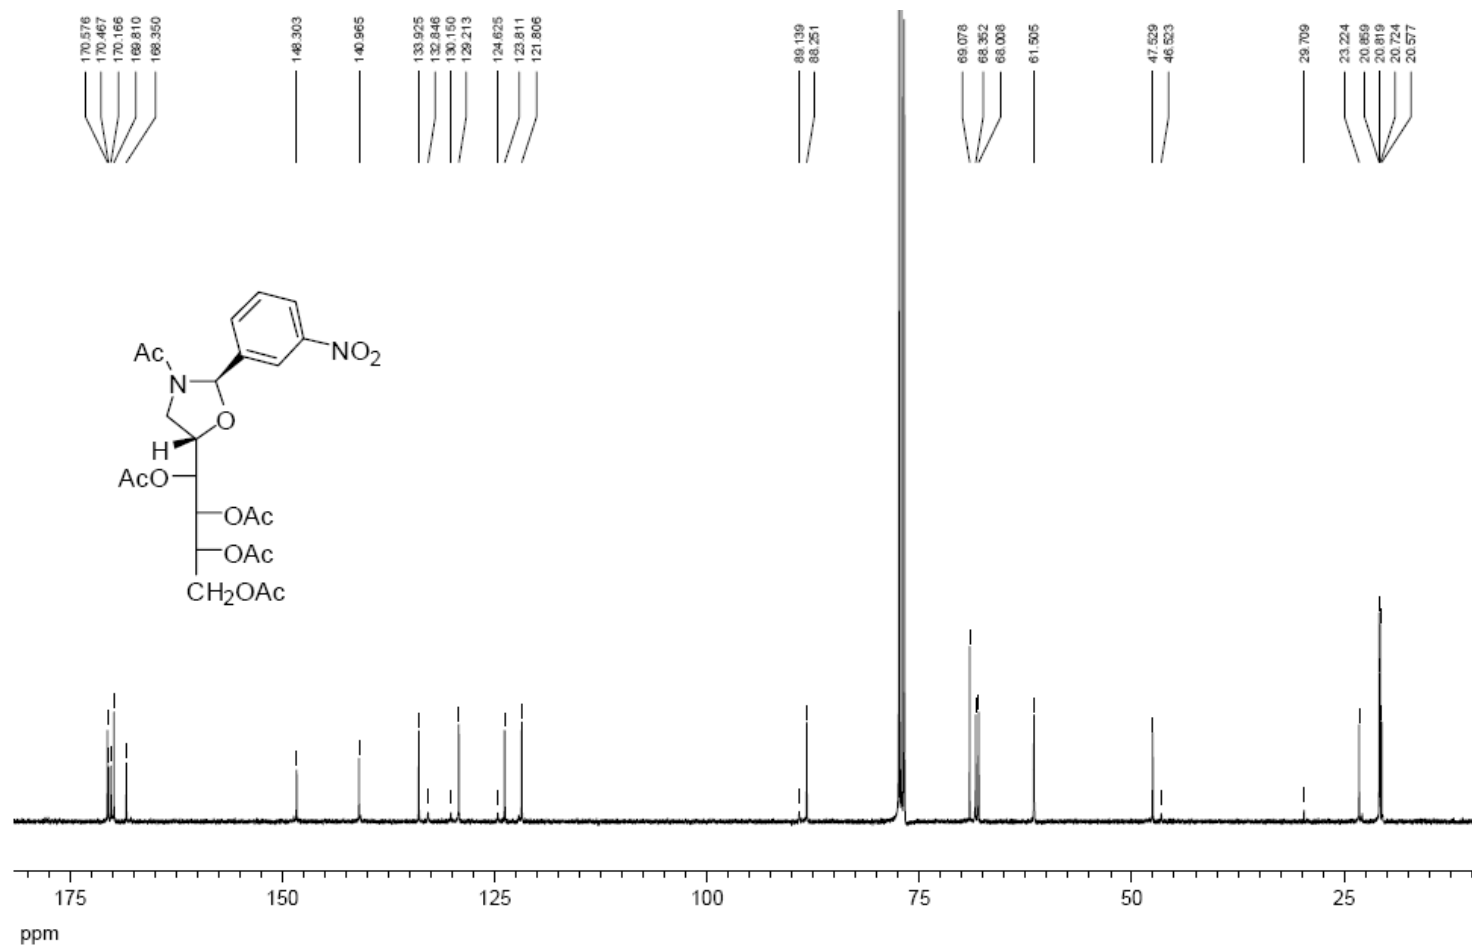

<sup>1</sup>H-NMR Spectrum for (2*R*,5*S*)-3-acetyl-2-(4-cyanophenyl)-5-(1,2,3,4-tetra-*O*-acetyl-*D*-arabino-tetrahydrobutyl-1-yl)oxazolidine (**3E,Z**)

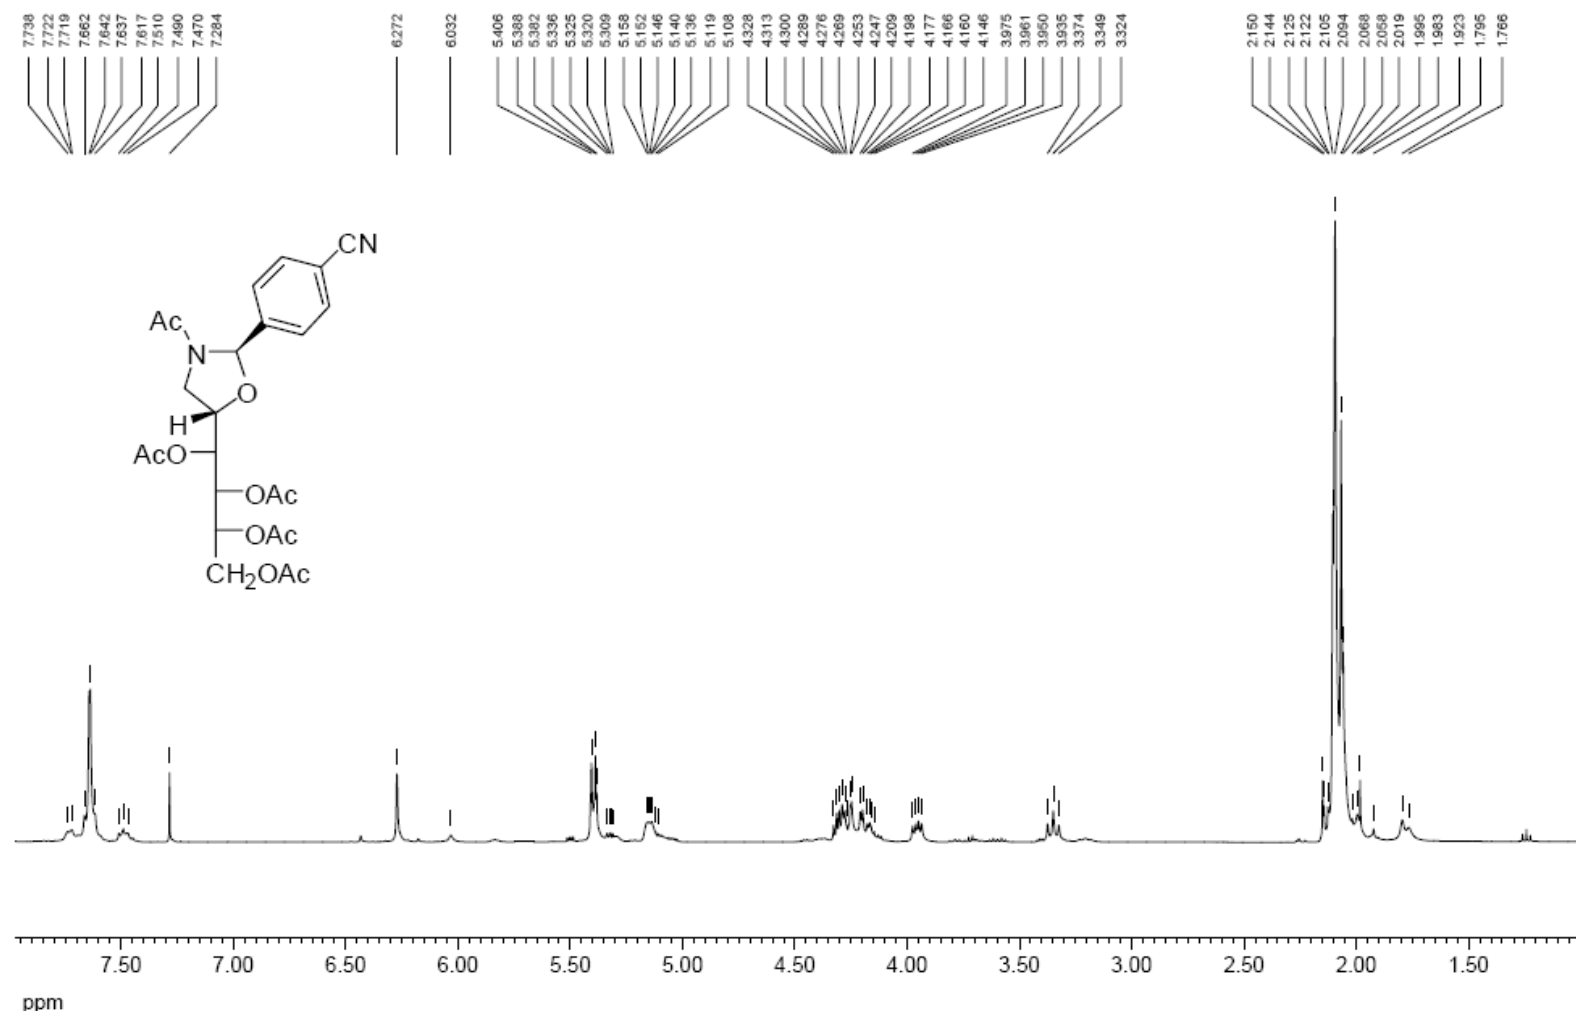

$^{13}\text{C}$ -NMR Spectrum for (2*R*,5*S*)-3-acetyl-2-(4-cyanophenyl)-5-(1,2,3,4-tetra-*O*-acetyl-*D*-arabino-tetrahydrobutyl-1-yl)oxazolidine (**3E,Z**)

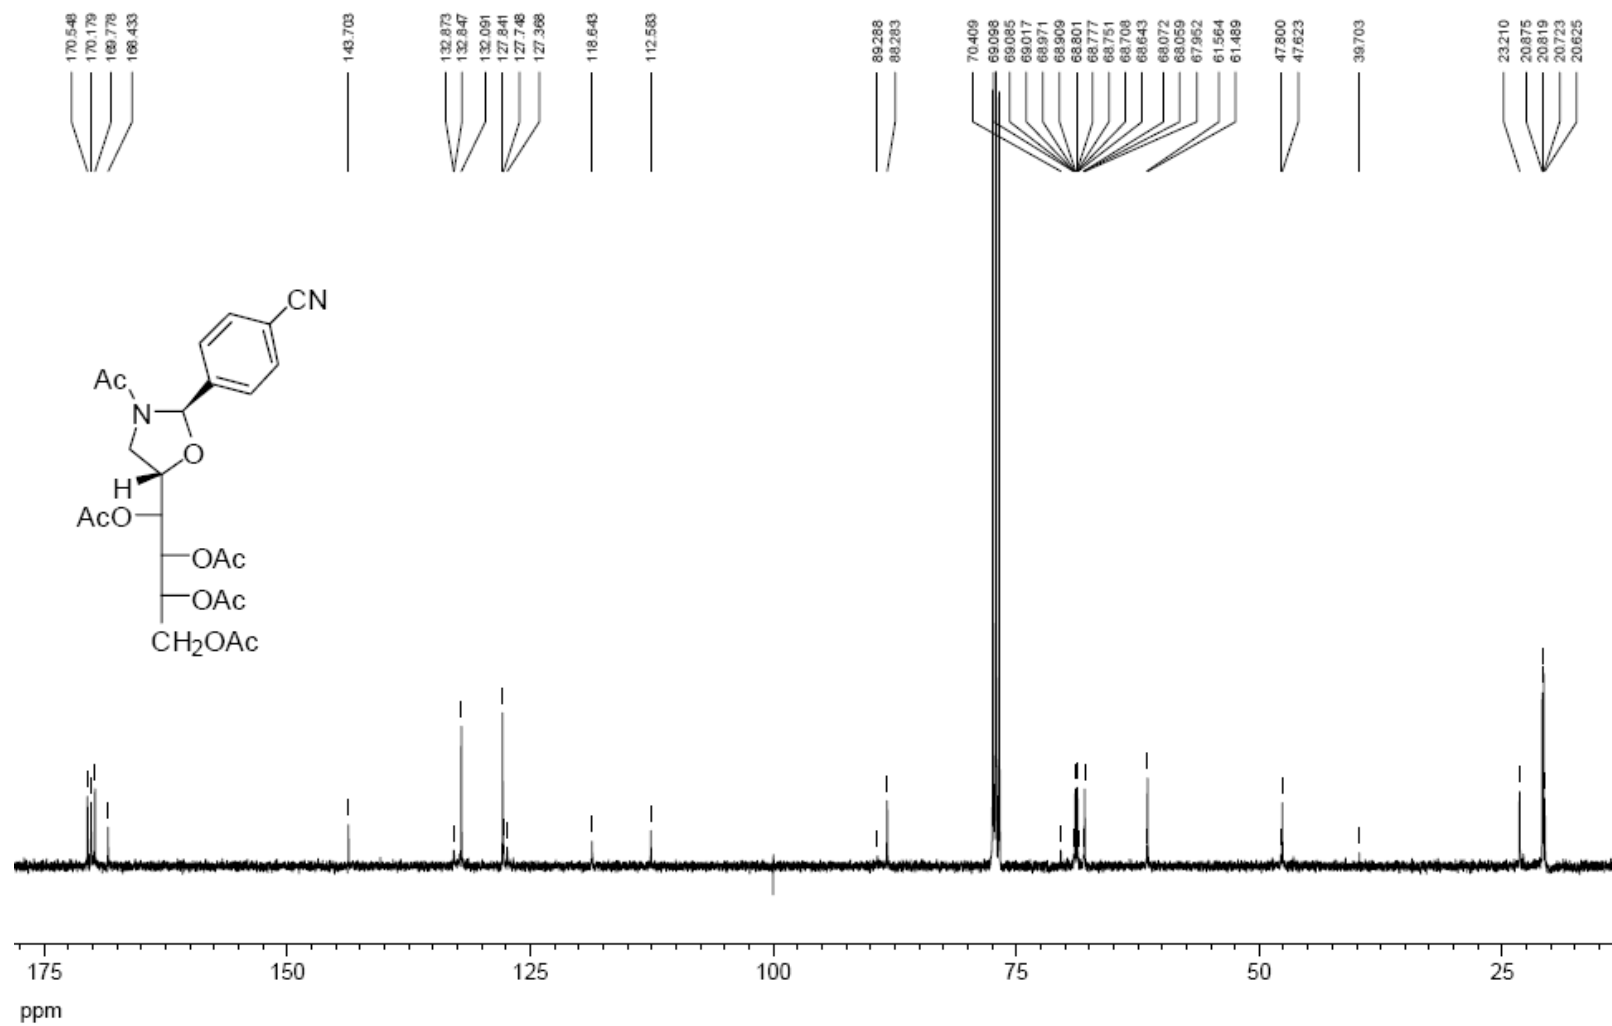

<sup>1</sup>H-NMR Spectrum for (2*R*,5*S*)-3-acetyl-2-(4-trifluoromethylphenyl)-5-(1,2,3,4-tetra-*O*-acetyl-*D*-arabino-tetrahydrobutyl-1-yl)oxazolidine (**4E,Z**)

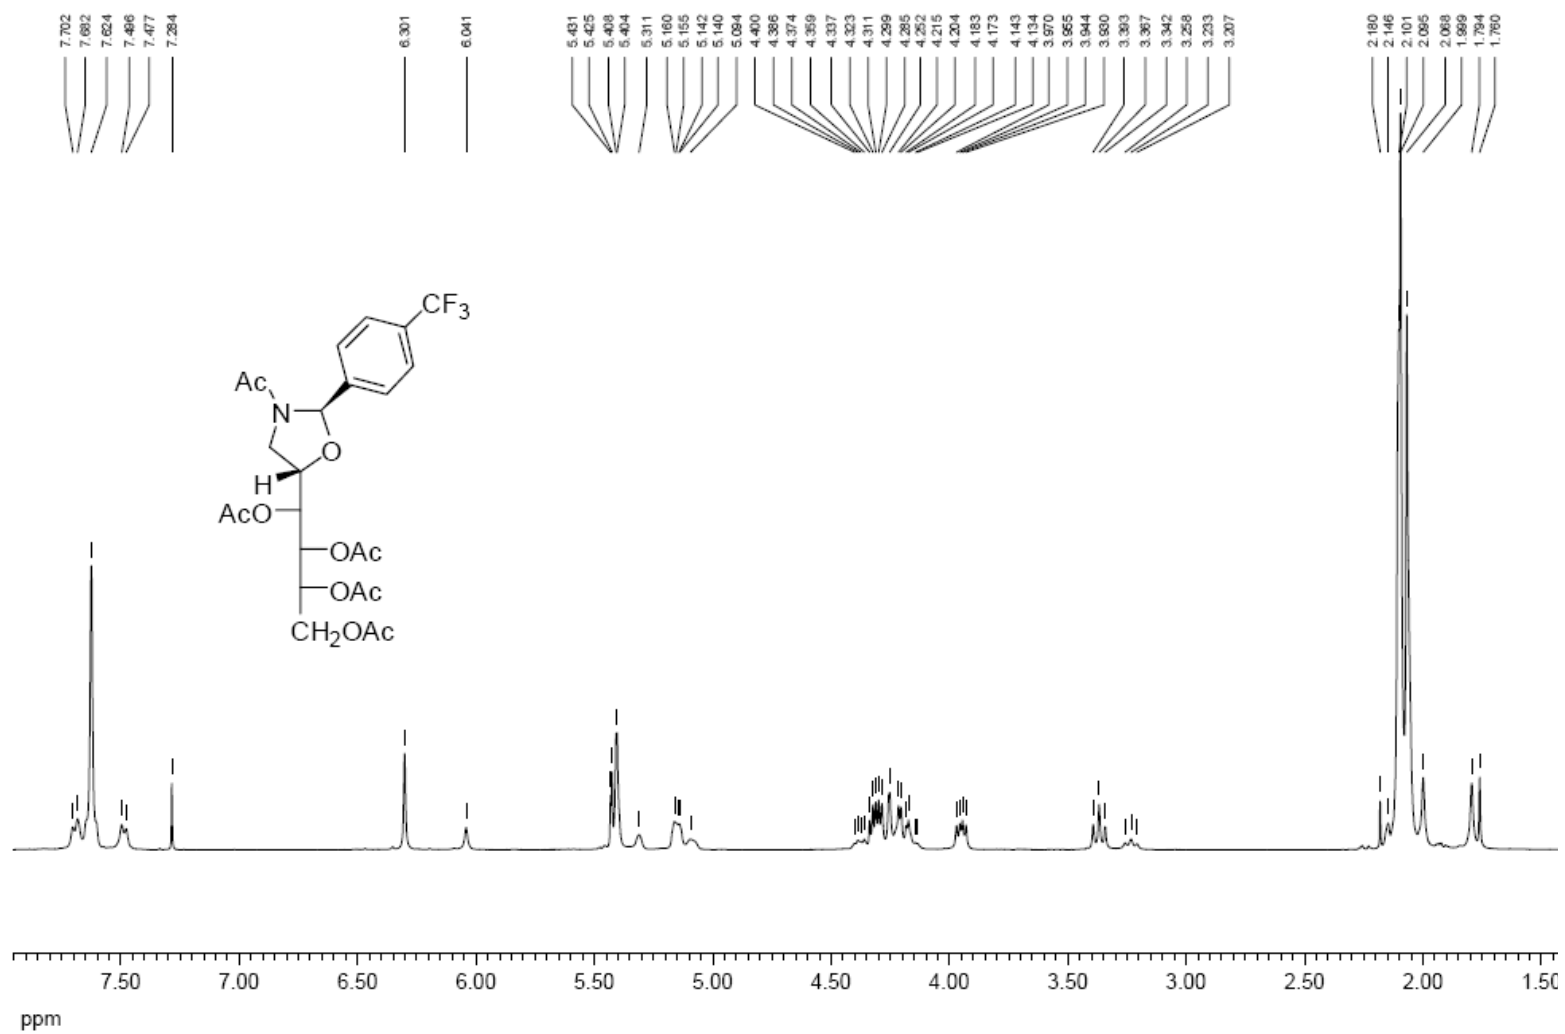

$^{13}\text{C}$ -NMR Spectrum for (2*R*,5*S*)-3-acetyl-2-(4-trifluoromethylphenyl)-5-(1,2,3,4-tetra-*O*-acetyl-*D*-arabino-tetrahydrobutyl-1-yl)oxazolidine (**4E,Z**)

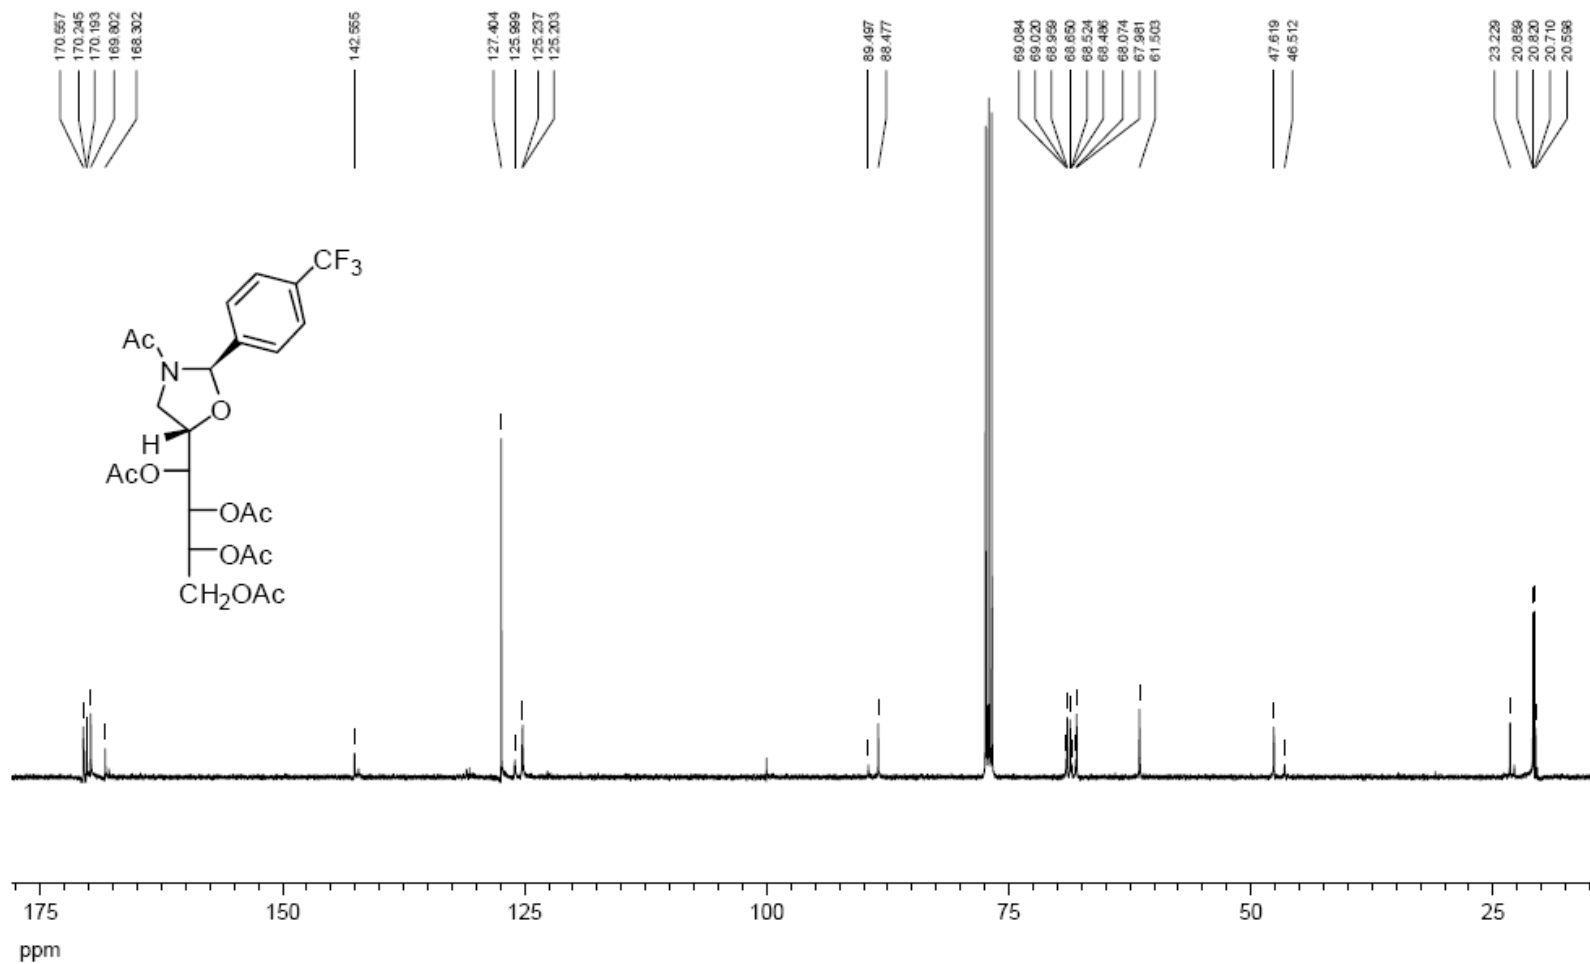

$^1\text{H-NMR}$  Spectrum for (2*R*,5*S*)-3-acetyl-2-(4-dimethylaminophenyl)-5-(1,2,3,4-tetra-*O*-acetyl-*D*-arabino-tetrahydrobutyl-1-yl)oxazolidine (**11E,Z**)

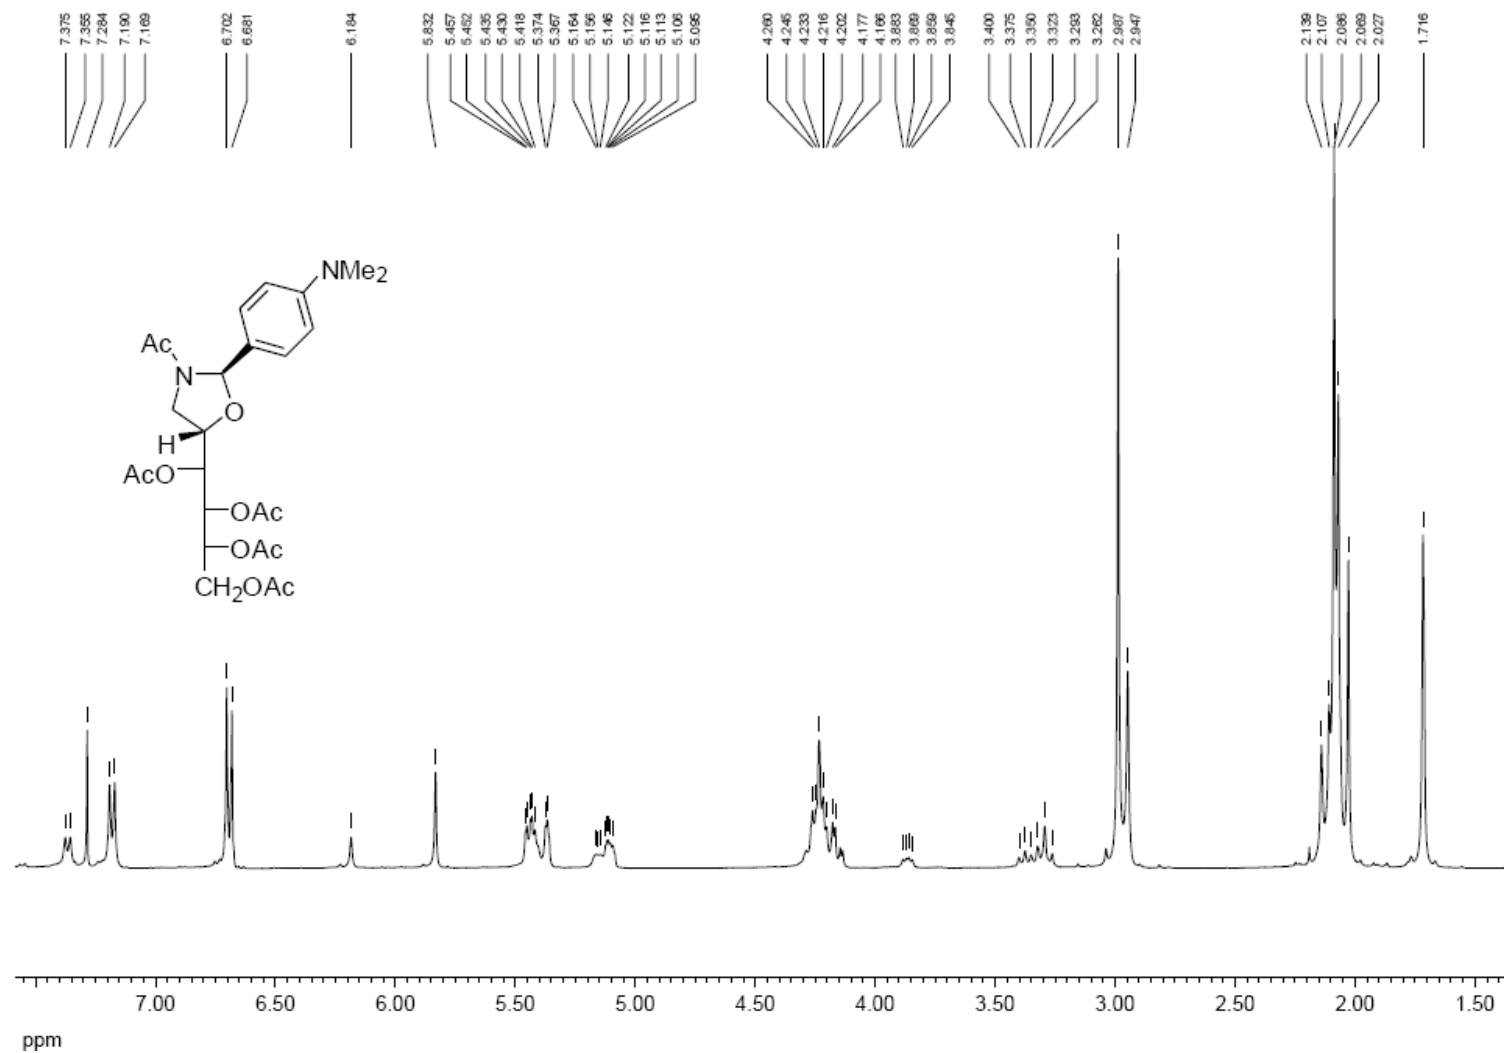

<sup>13</sup>C-NMR Spectrum for (2*R*,5*S*)-3-acetyl-2-(4-dimethylaminophenyl)-5-(1,2,3,4-tetra-*O*-acetyl-*D*-arabino-tetrahydrobutyl-1-yl)oxazolidine (**11E,Z**)

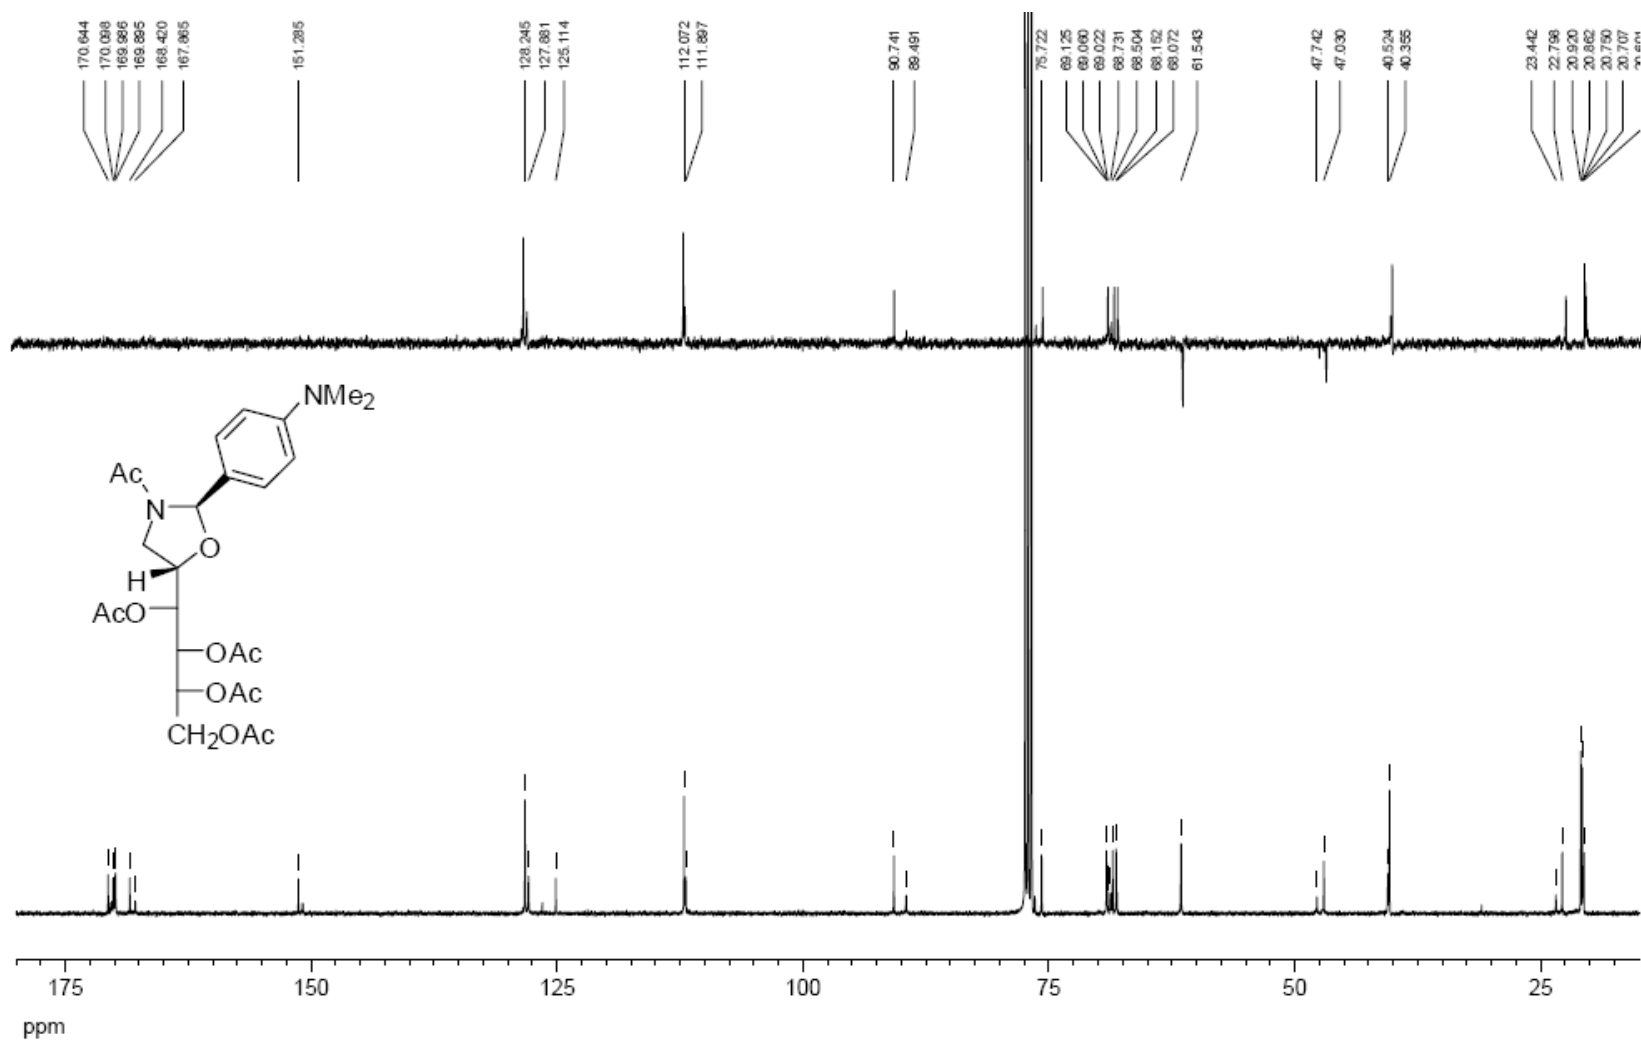

$^1\text{H-NMR}$  Spectrum for (2*S*,5*S*)-3-acetyl-2-(4-dimethylaminophenyl)-5-(1,2,3,4-tetra-*O*-acetyl-*D*-arabino-tetrahydroxybutyl-1-yl)oxazolidine (**23E,Z**)

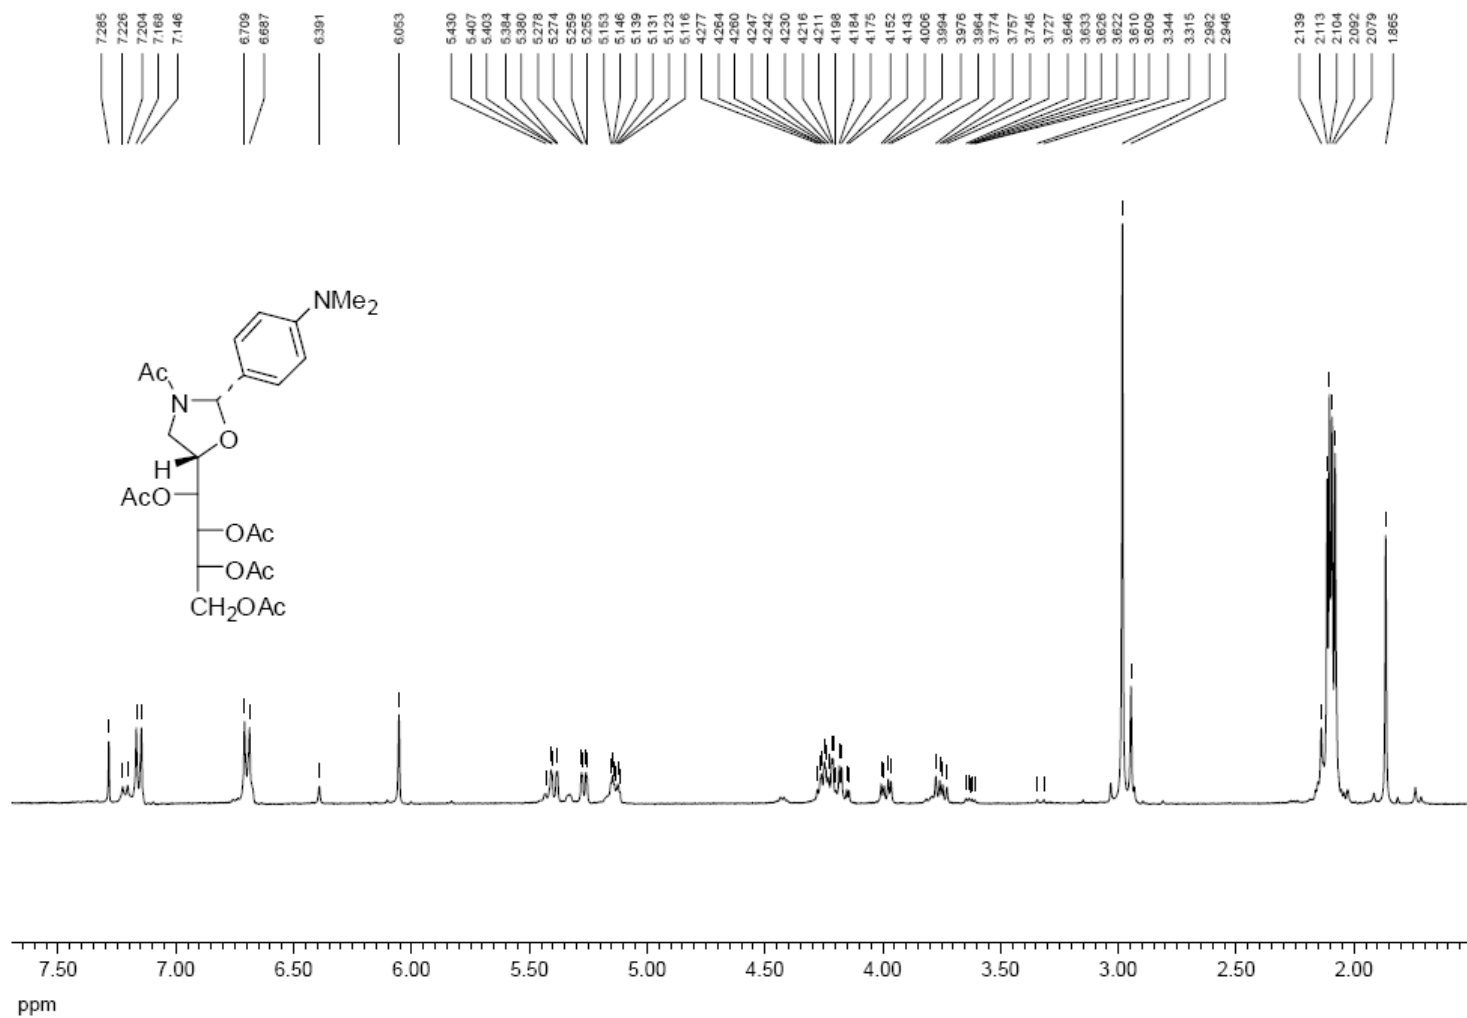



$^{13}\text{C}$ -NMR Spectrum for (2*S*,5*S*)-3-acetyl-2-(4-dimethylaminophenyl)-5-(1,2,3,4-tetra-*O*-acetyl-*D*-arabino-tetrahydrobutyl-1-yl)oxazolidine (**23E,Z**)

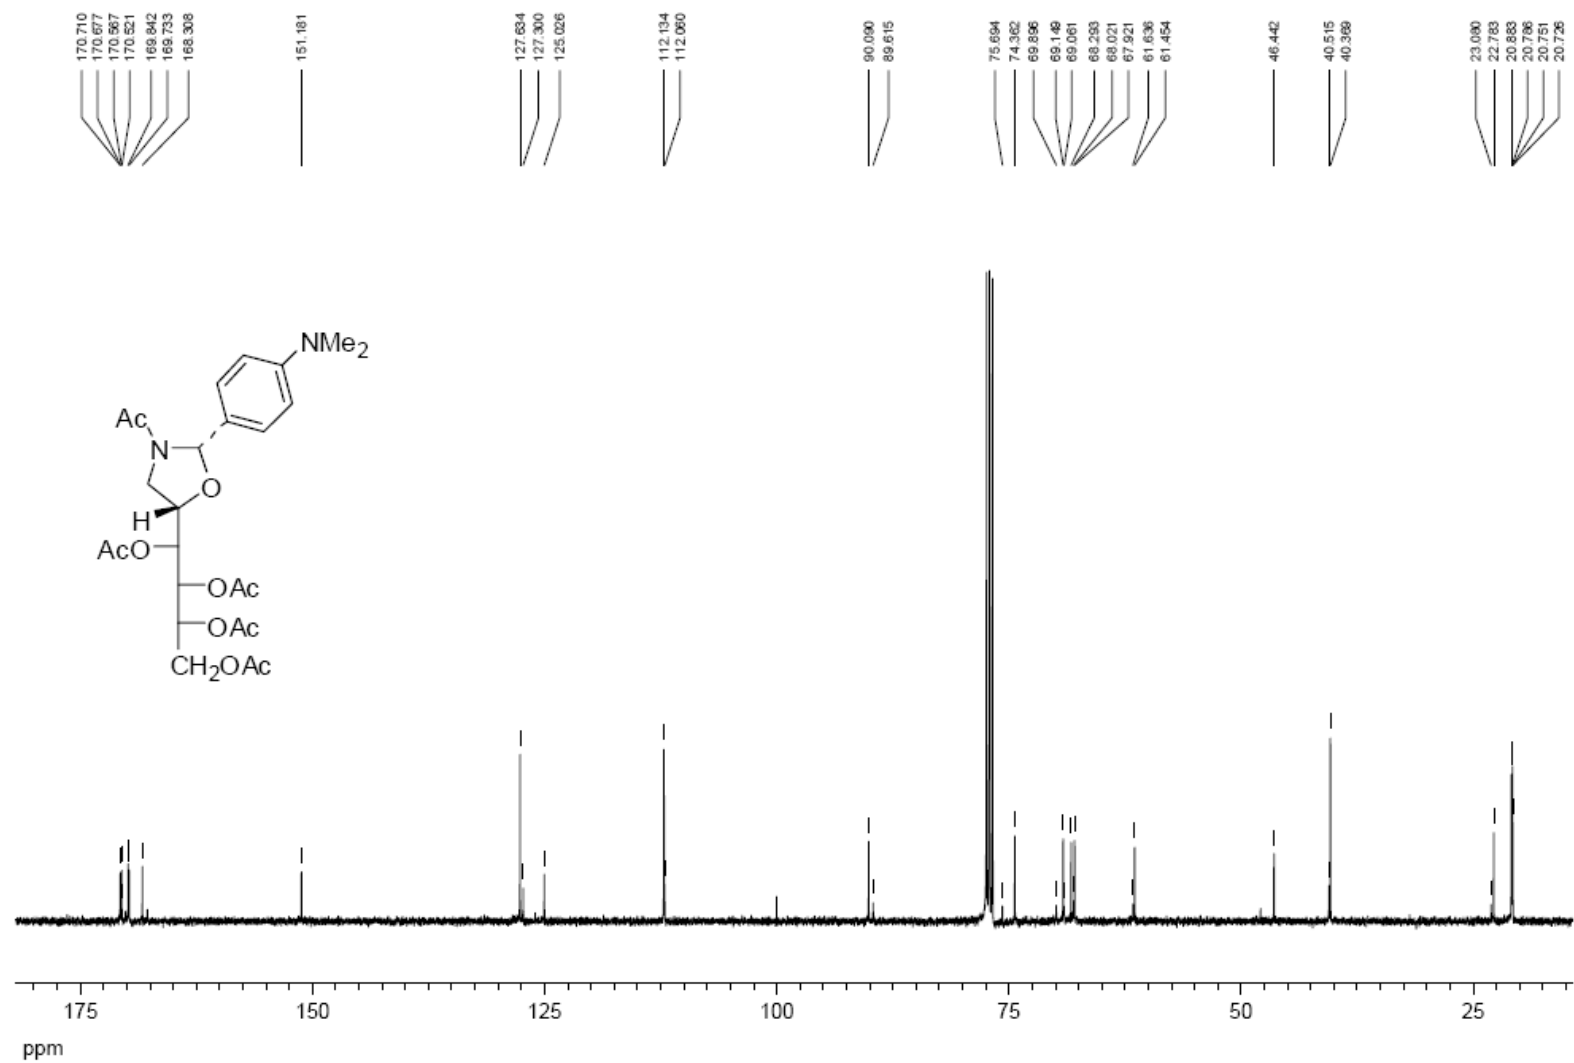

$^1\text{H-NMR}$  Spectrum for (2*R*,5*S*)-3-acetyl-2-(3-nitrophenyl)-5-(*D*-arabino-tetrahydrobutyl-1-yl)oxazolidine (**26E,Z**)

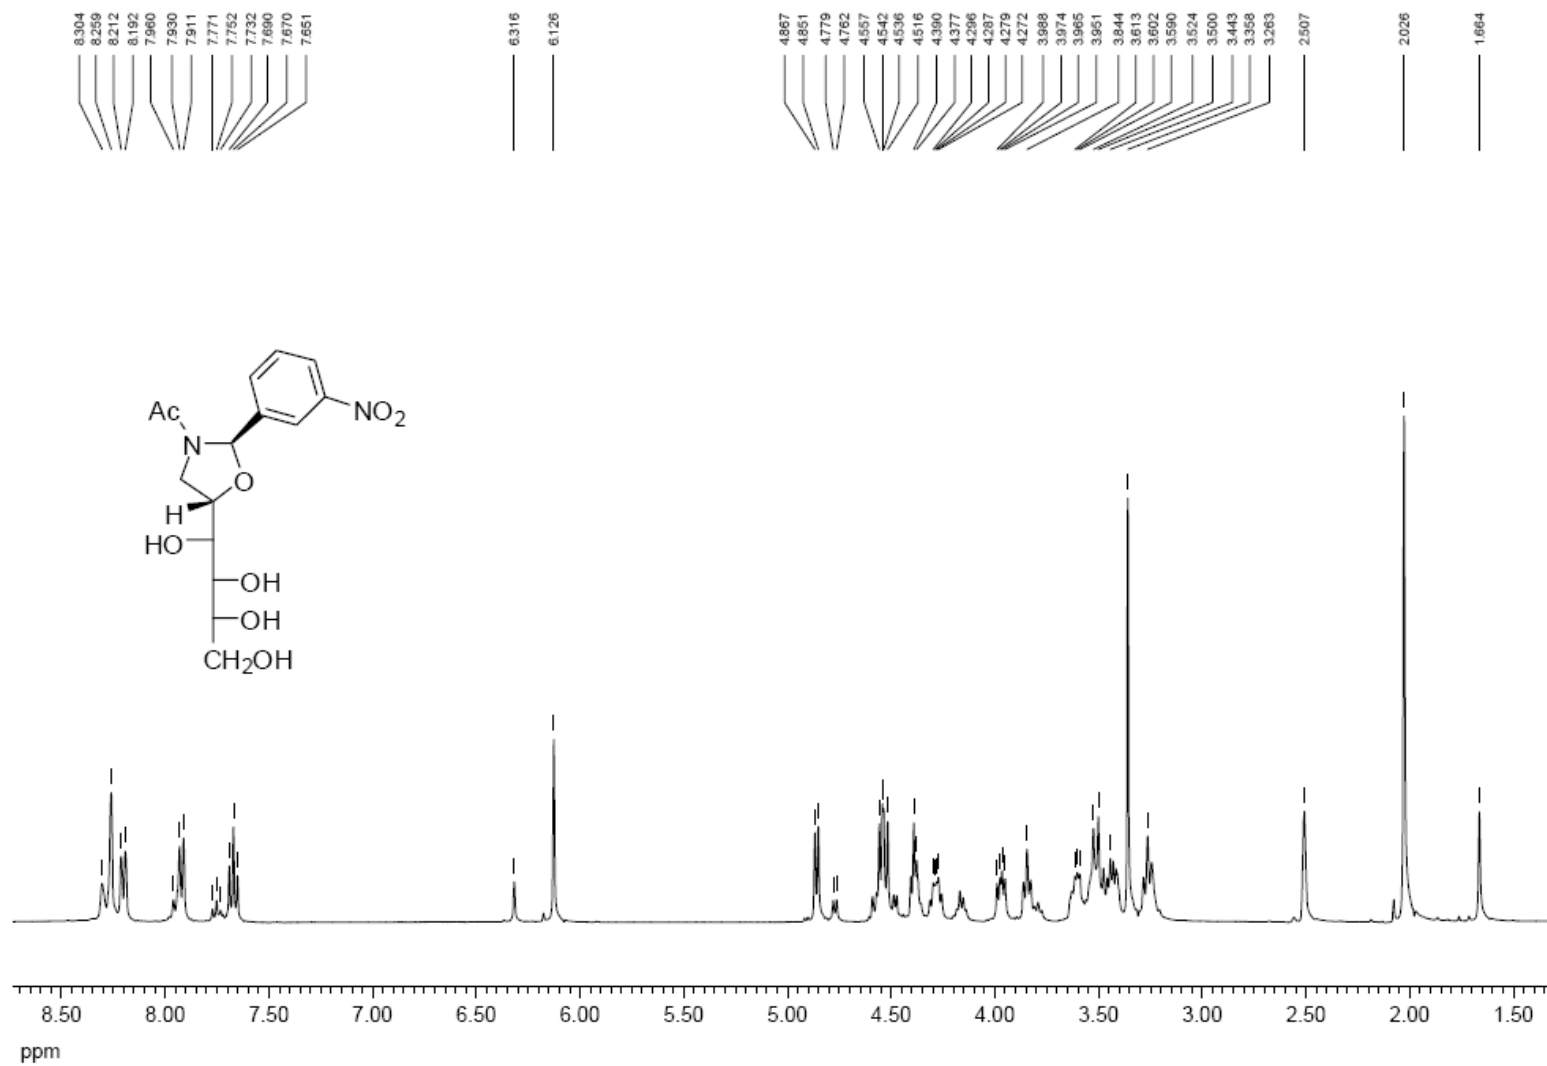

$^{13}\text{C}$ -NMR Spectrum for (2*R*,5*S*)-3-acetyl-2-(3-nitrophenyl)-5-(*D*-arabino-tetrahydroxybutyl-1-yl)oxazolidine (**26E,Z**)

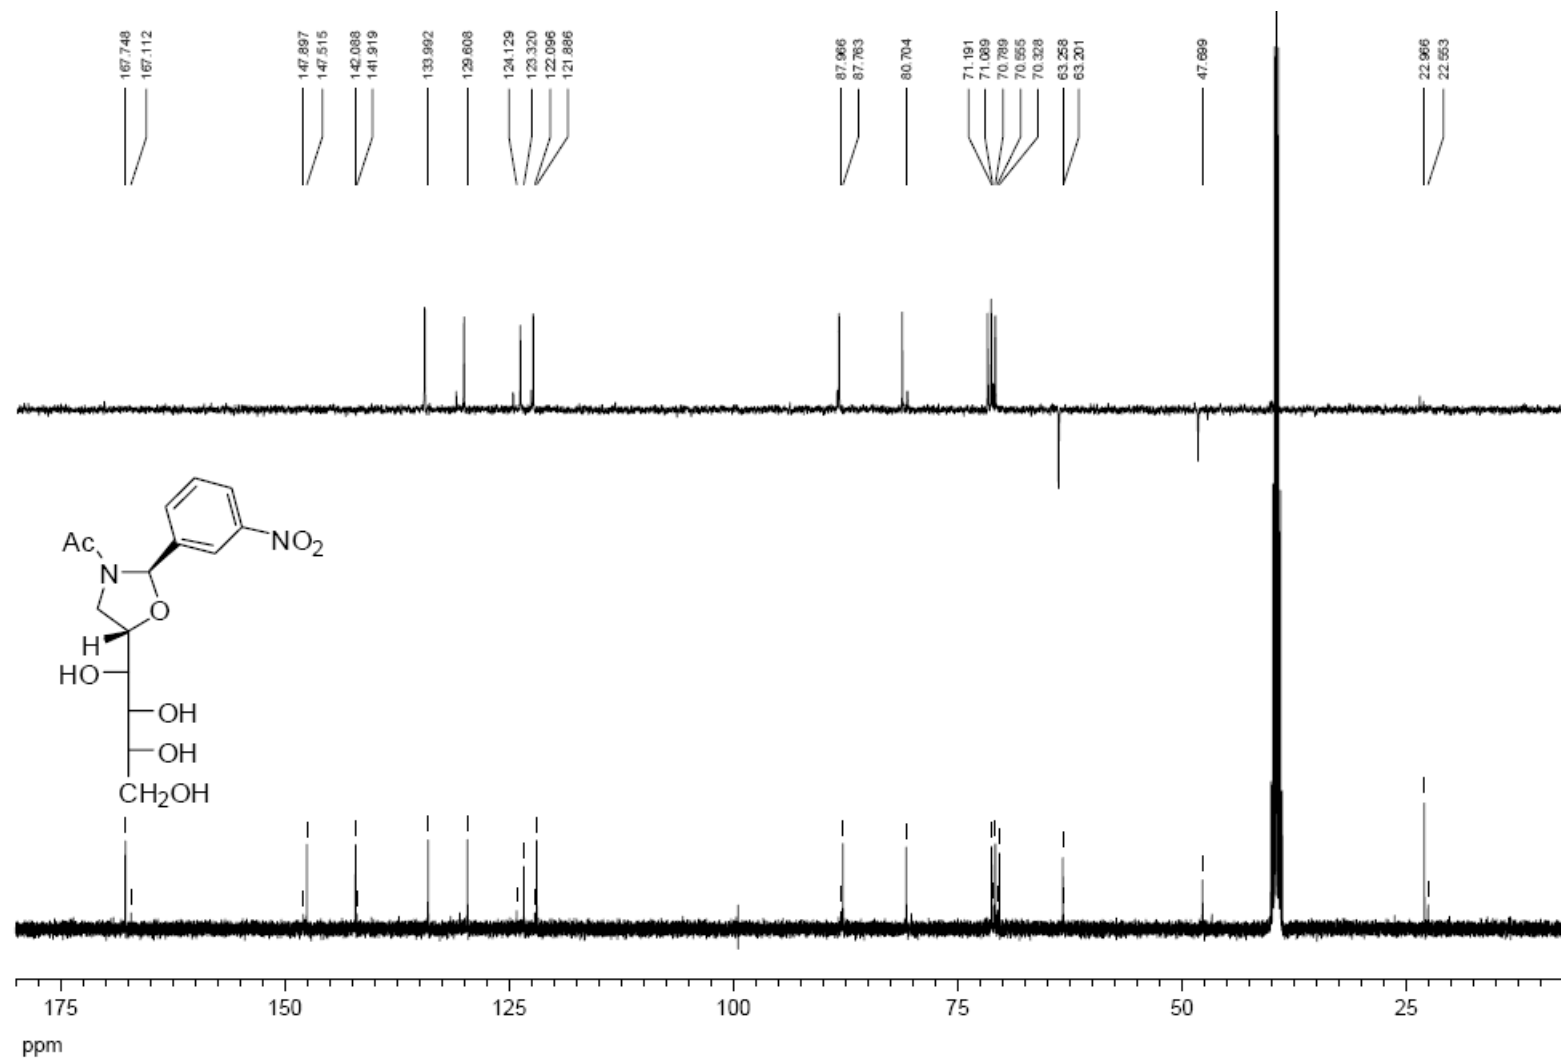

$^1\text{H-NMR}$  Spectrum for (2*R*,5*S*)-3-acetyl-2-(4-cyanophenyl)-5-(*D*-*arabino*-tetrahydroxybutyl-1-yl)oxazolidine (**27E,Z**)

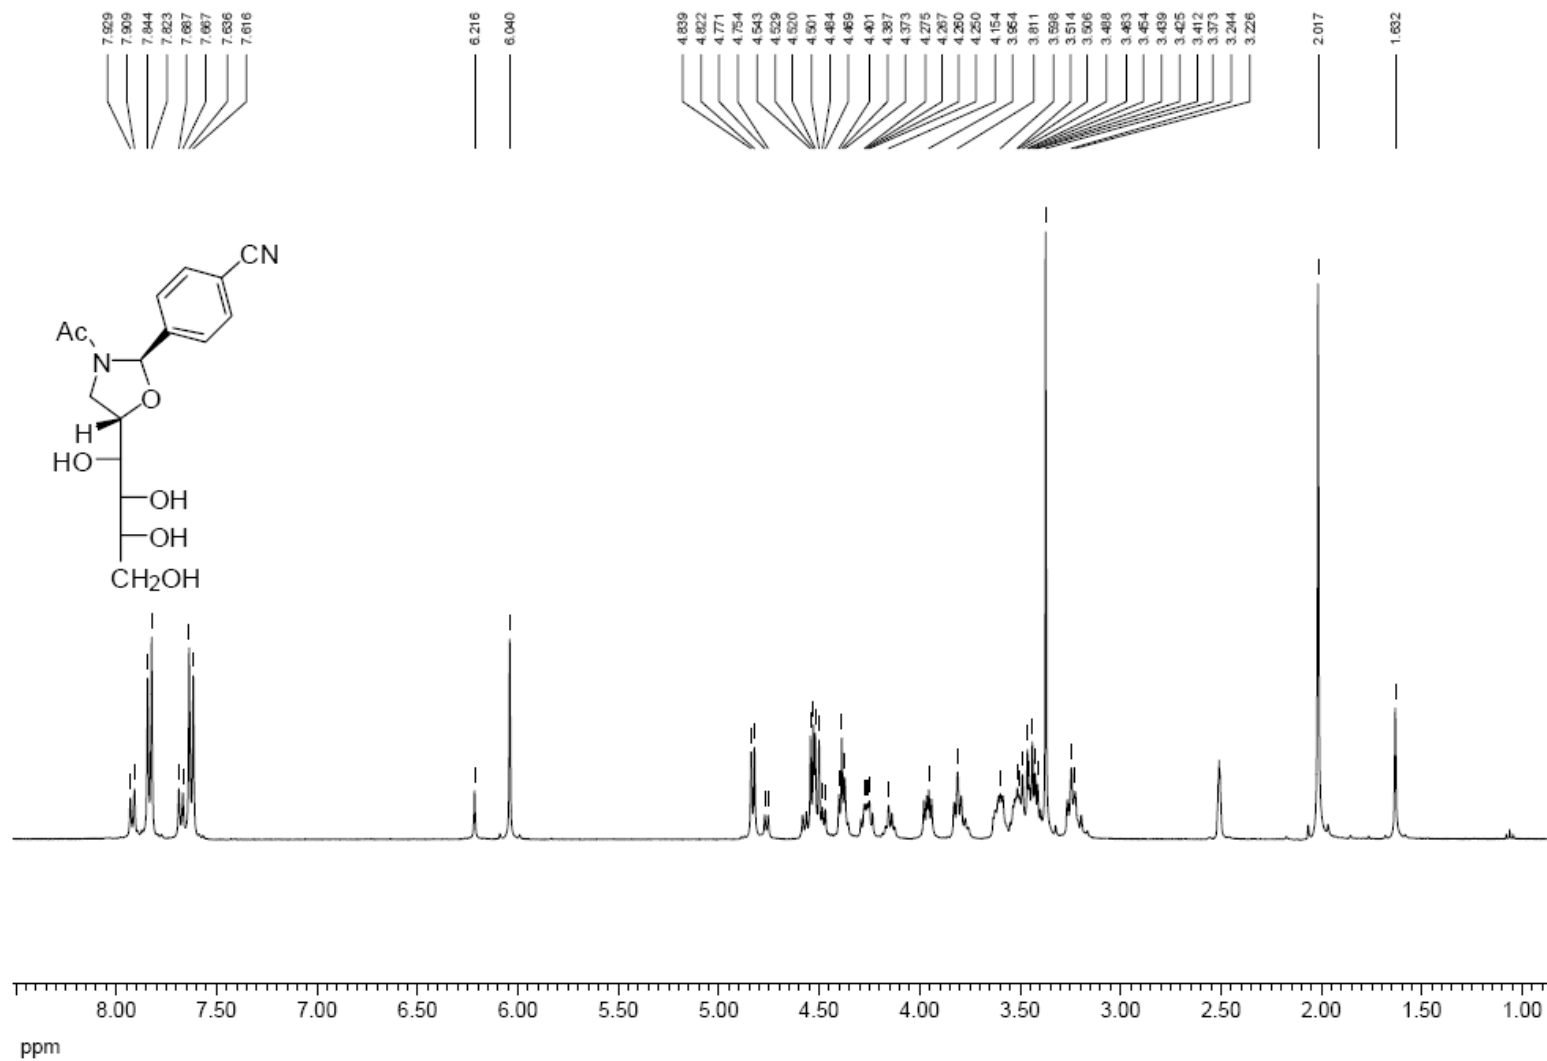

$^{13}\text{C}$ -NMR Spectrum for (2*R*,5*S*)-3-acetyl-2-(4-cyanophenyl)-5-(*D*-arabino-tetrahydroxybutyl-1-yl)oxazolidine (**27E,Z**)

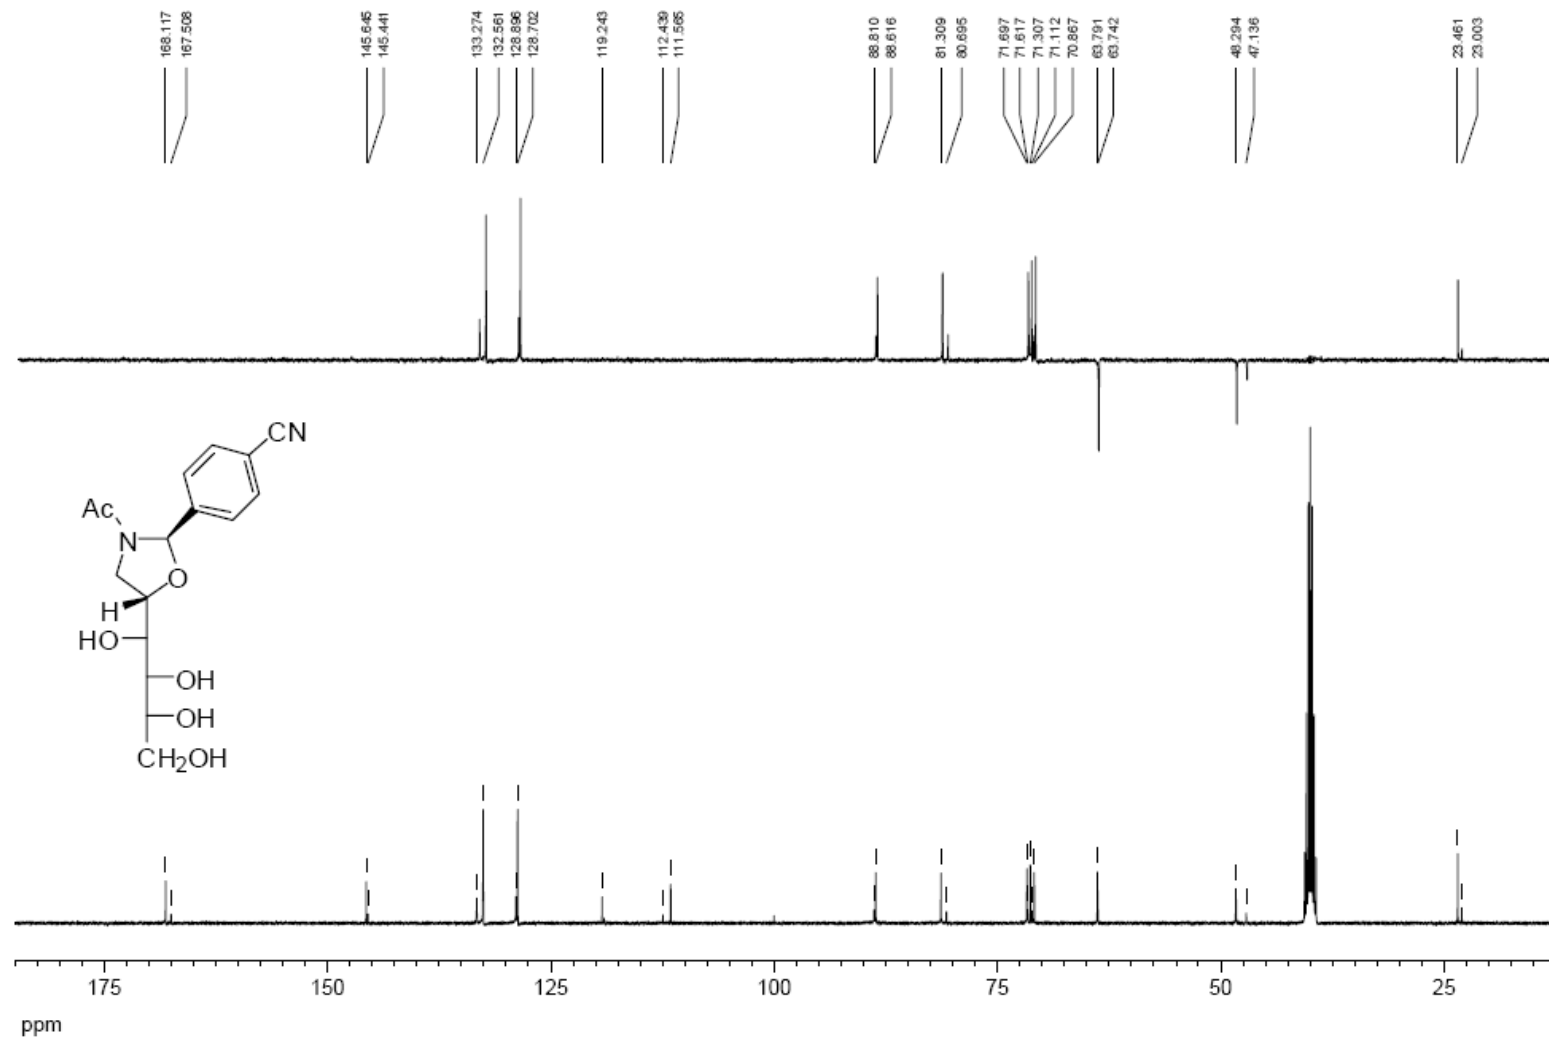

$^1\text{H-NMR}$  Spectrum for (2*R*,5*S*)-3-acetyl-2-(4-trifluoromethylphenyl)-5-(*D*-arabino-tetrahydrobutyl-1-yl)oxazolidine (**28E,Z**)

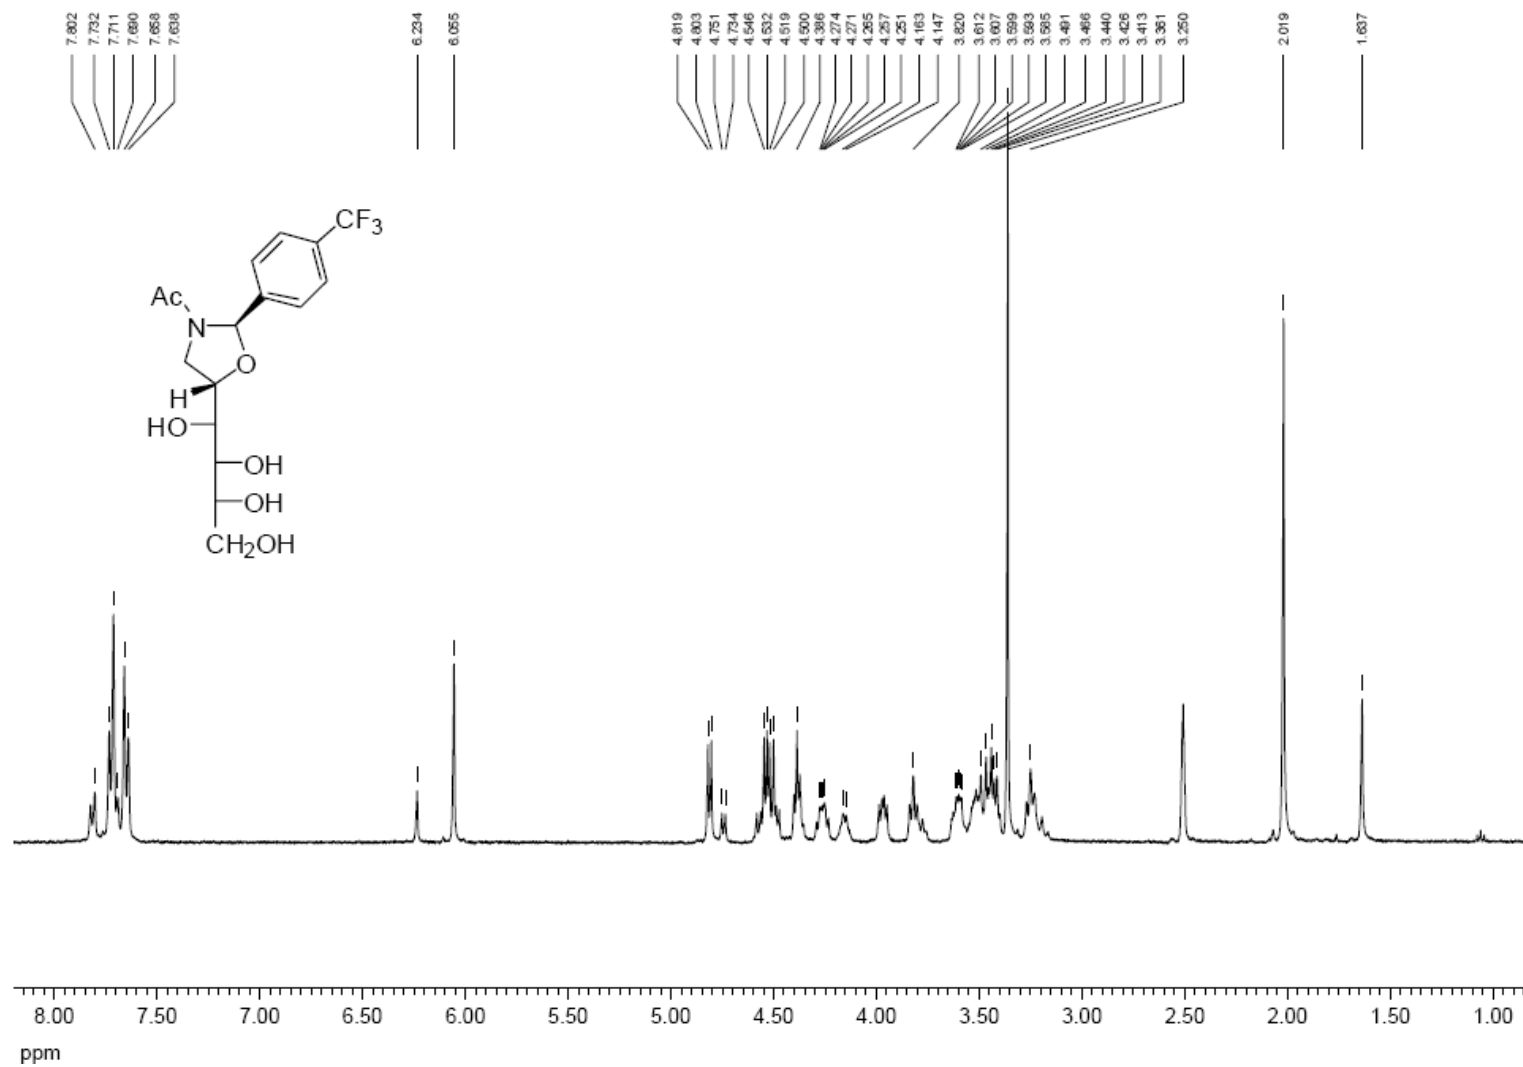

$^{13}\text{C}$ -NMR Spectrum for (2*R*,5*S*)-3-acetyl-2-(4-trifluoromethylphenyl)-5-(*D*-arabino-tetrahydroxybutyl-1-yl)oxazolidine (**28E,Z**)

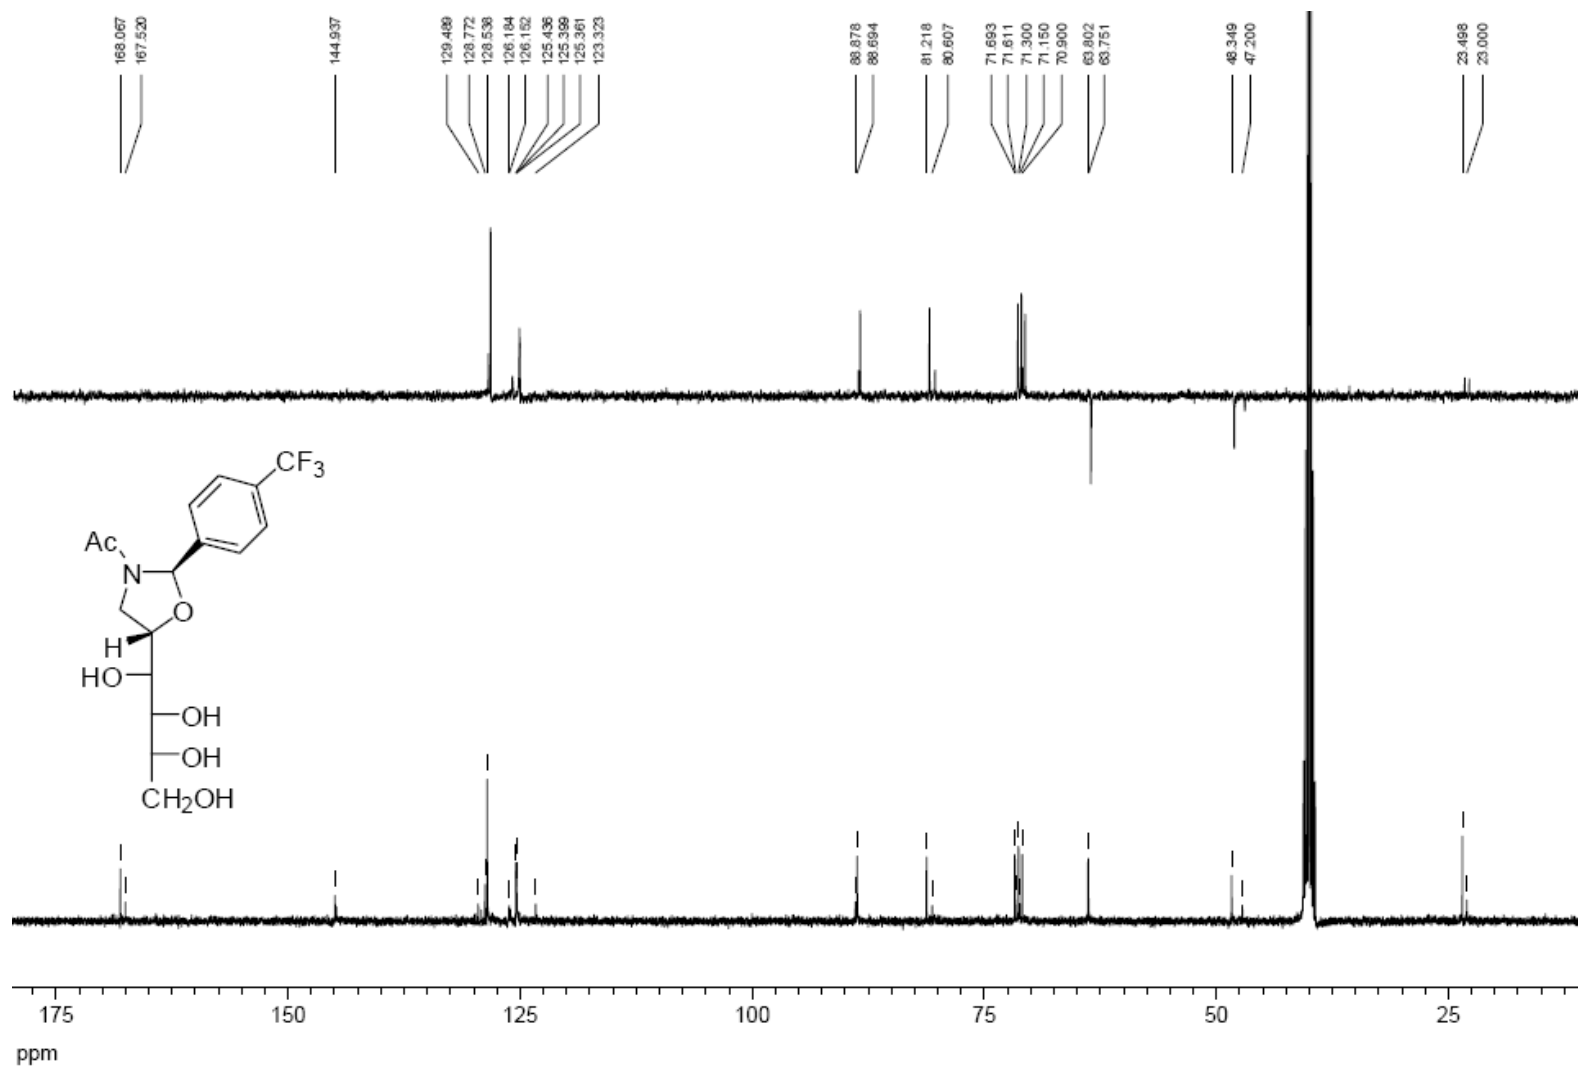

$^1\text{H-NMR}$  Spectrum for (2*R*,5*S*)-3-acetyl-2-(4-dimethylaminophenyl)-5-(*D*-arabino-tetrahydrobutyl-1-yl)oxazolidine (**35E,Z**)

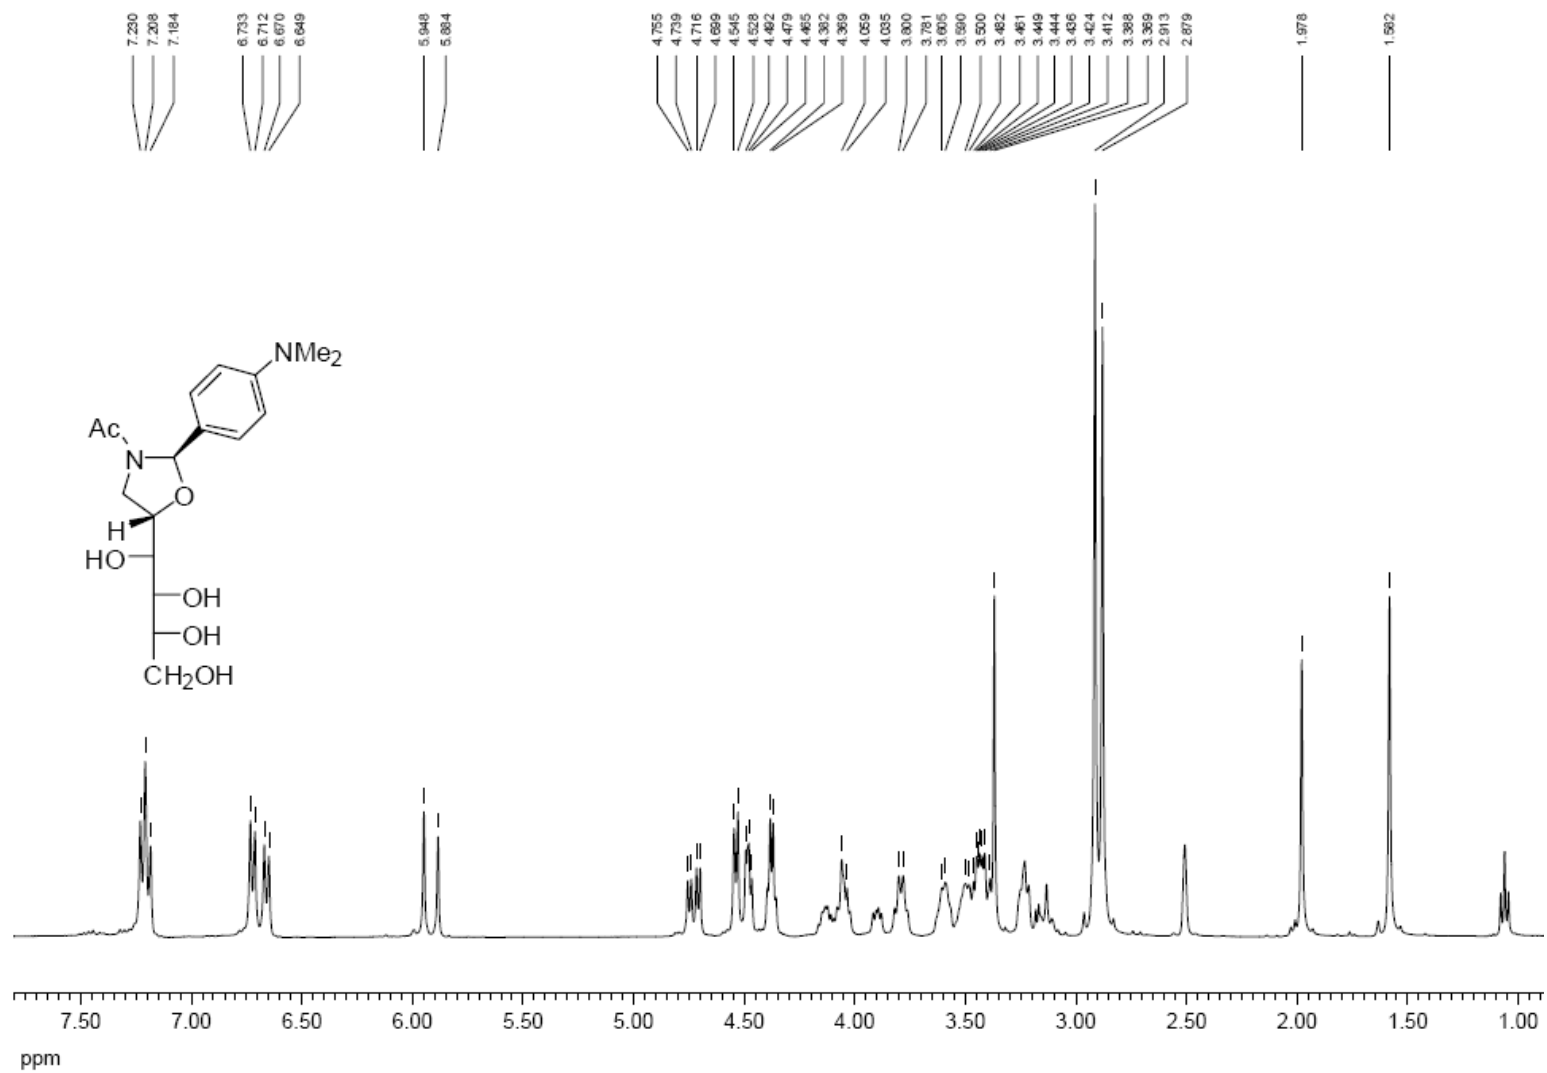



$^{13}\text{C}$ -NMR Spectrum for (2*R*,5*S*)-3-acetyl-2-(4-dimethylaminophenyl)-5-(*D*-arabino-tetrahydroxybutyl-1-yl)oxazolidine (**35E,Z**)

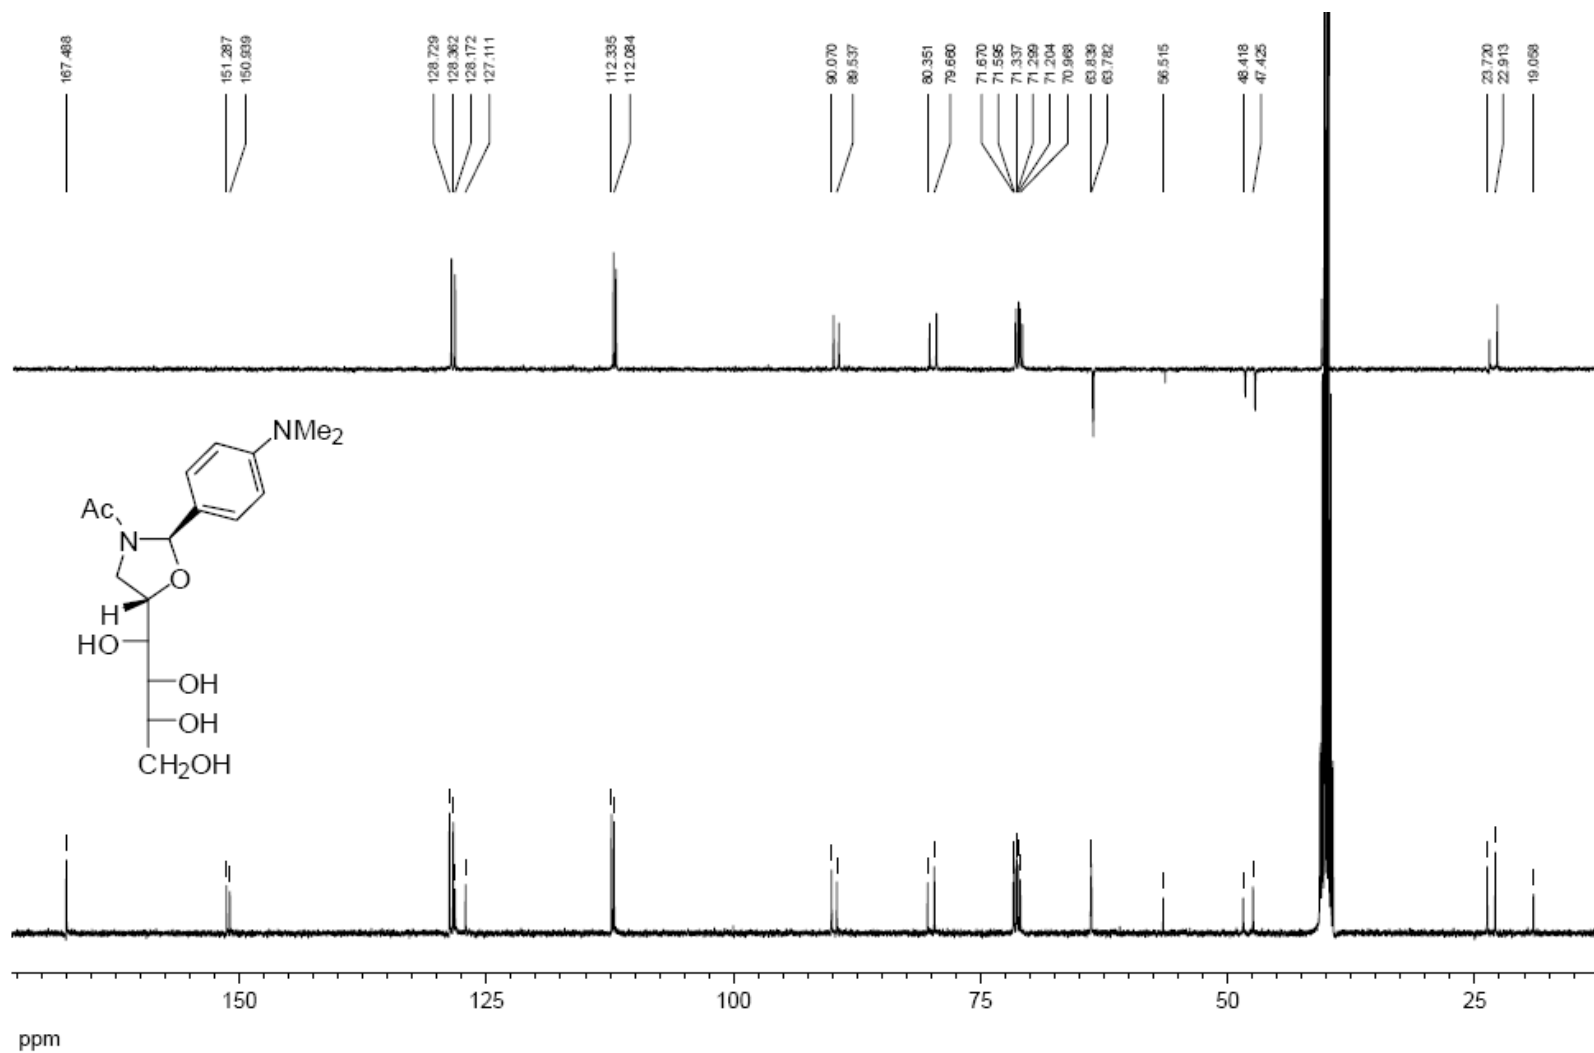

$^1\text{H-NMR}$  Spectrum for (2*R*, 5*S*)-2-(4-nitrophenyl)-5-(1,2,3,4-tetra-*O*-acetyl-*D*-arabino-tetrahydrobutyl-1-yl)-3-thioacetyloxazolidine (**38E,Z**)

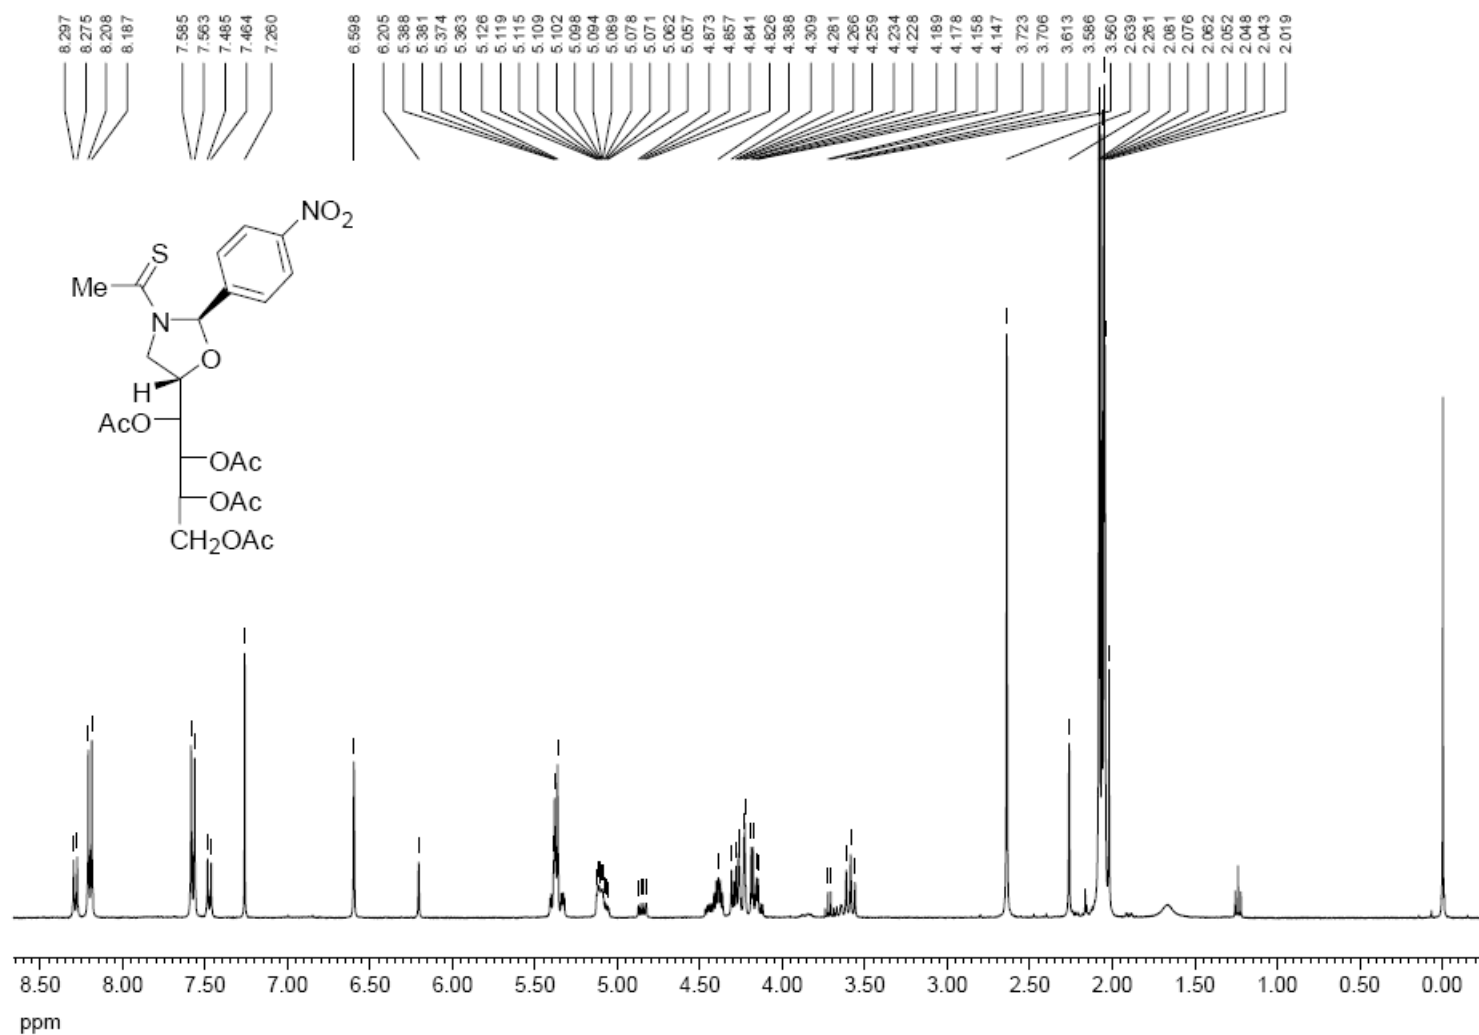

$^{13}\text{C}$ -NMR Spectrum for (2*R*, 5*S*)-2-(4-nitrophenyl)-5-(1,2,3,4-tetra-*O*-acetyl-*D*-arabino-tetrahydrobutyl-1-yl)-3-thioacetyloxazolidine (**38E,Z**)

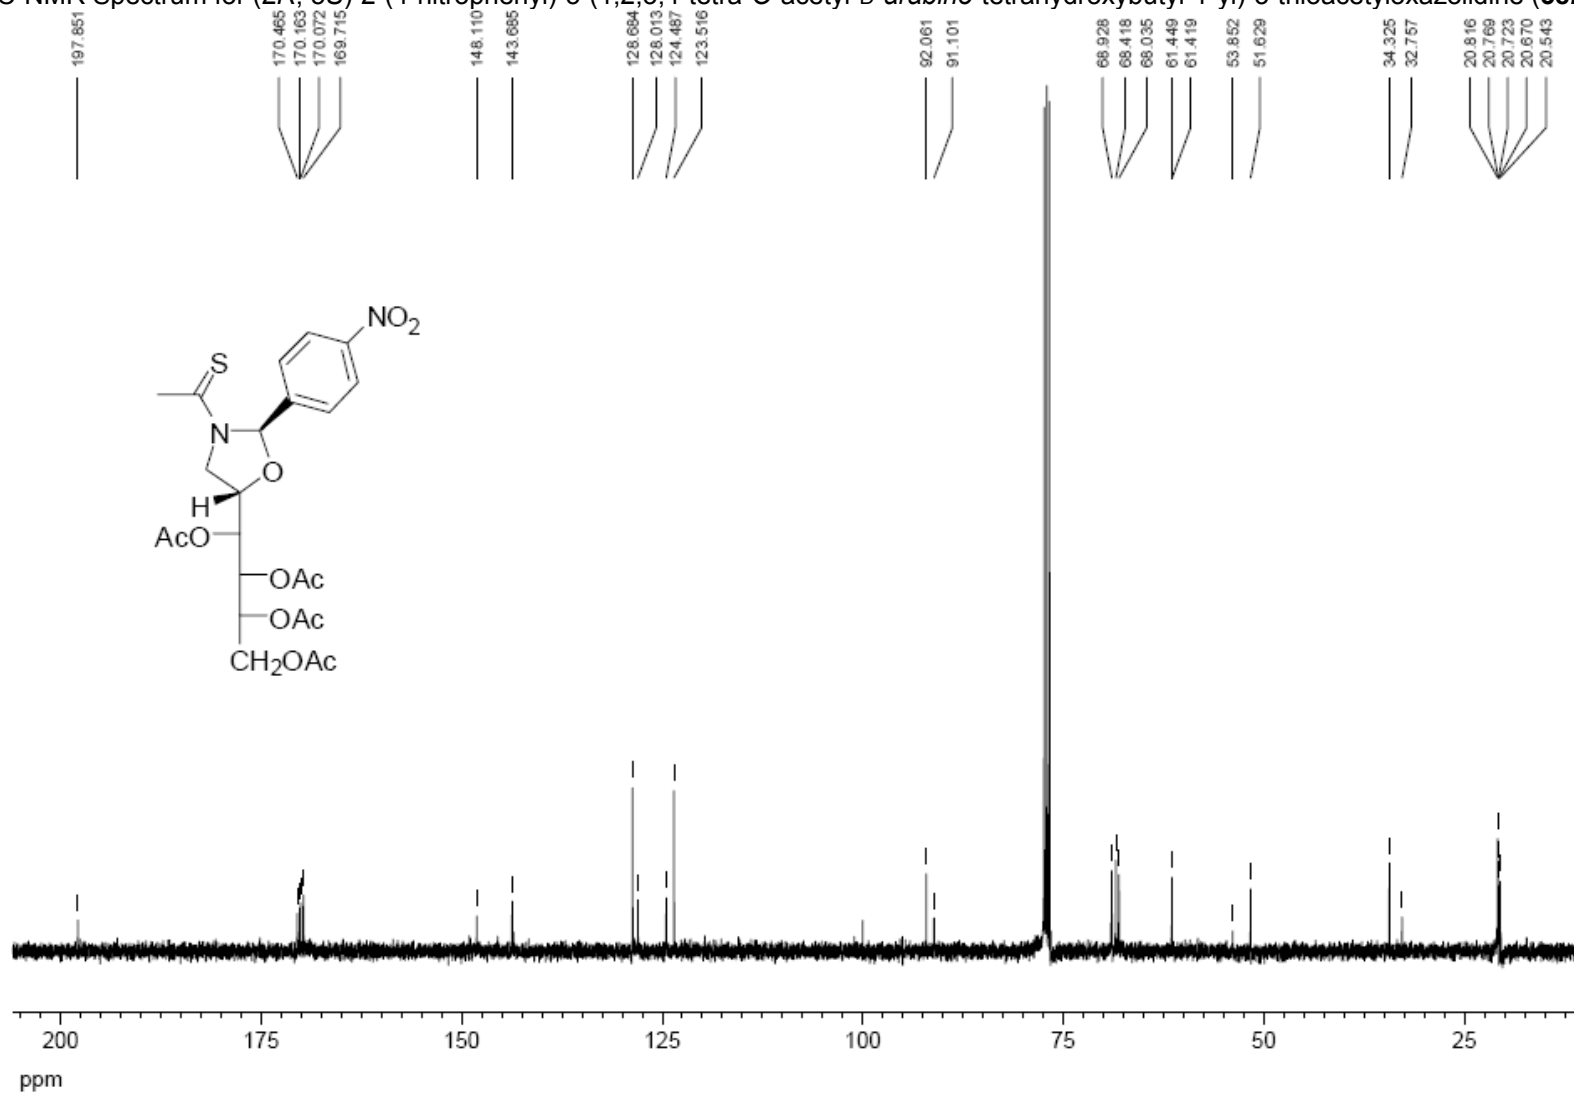

$^1\text{H-NMR}$  Spectrum for (2*S*, 5*S*)-2-(phenyl)-5-(1,2,3,4-tetra-*O*-acetyl-D-*arabino*-tetrahydrobutyl-1-yl)-3-thioacetyloxazolidine (**40E,Z**)

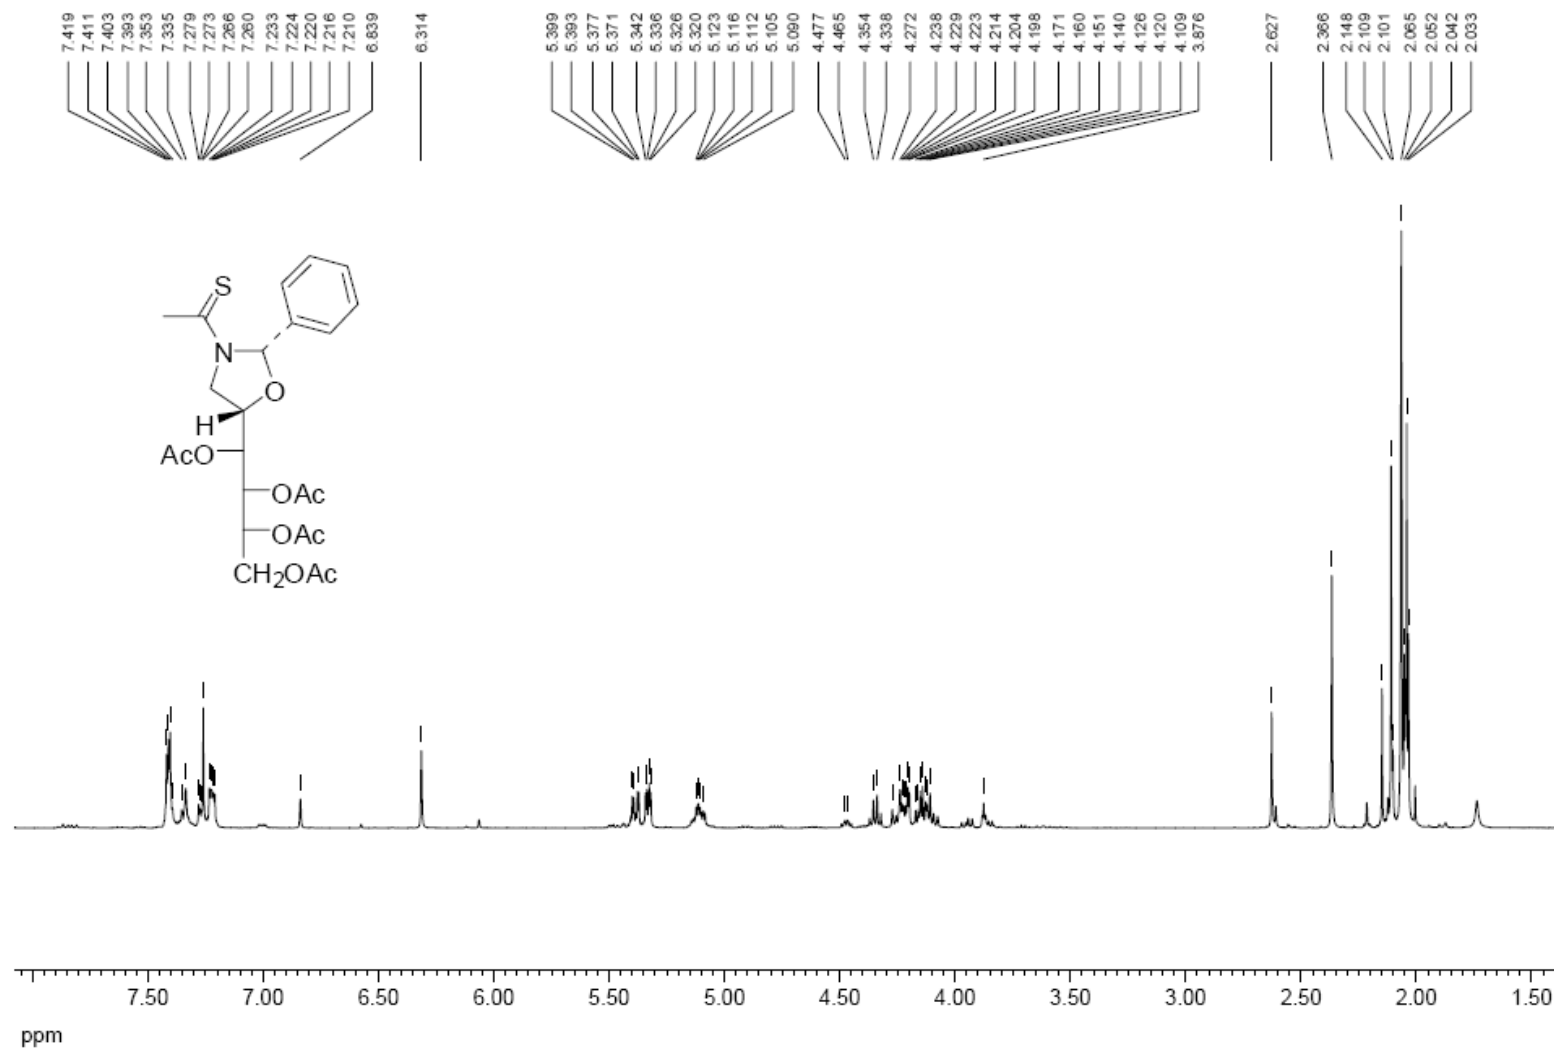

<sup>13</sup>C-NMR Spectrum for (2S, 5S)-2-(phenyl)-5-(1,2,3,4-tetra-O-acetyl-D-arabino-tetrahydrobutyl-1-yl)-3-thioacetyloxazolidine (**40E,Z**)

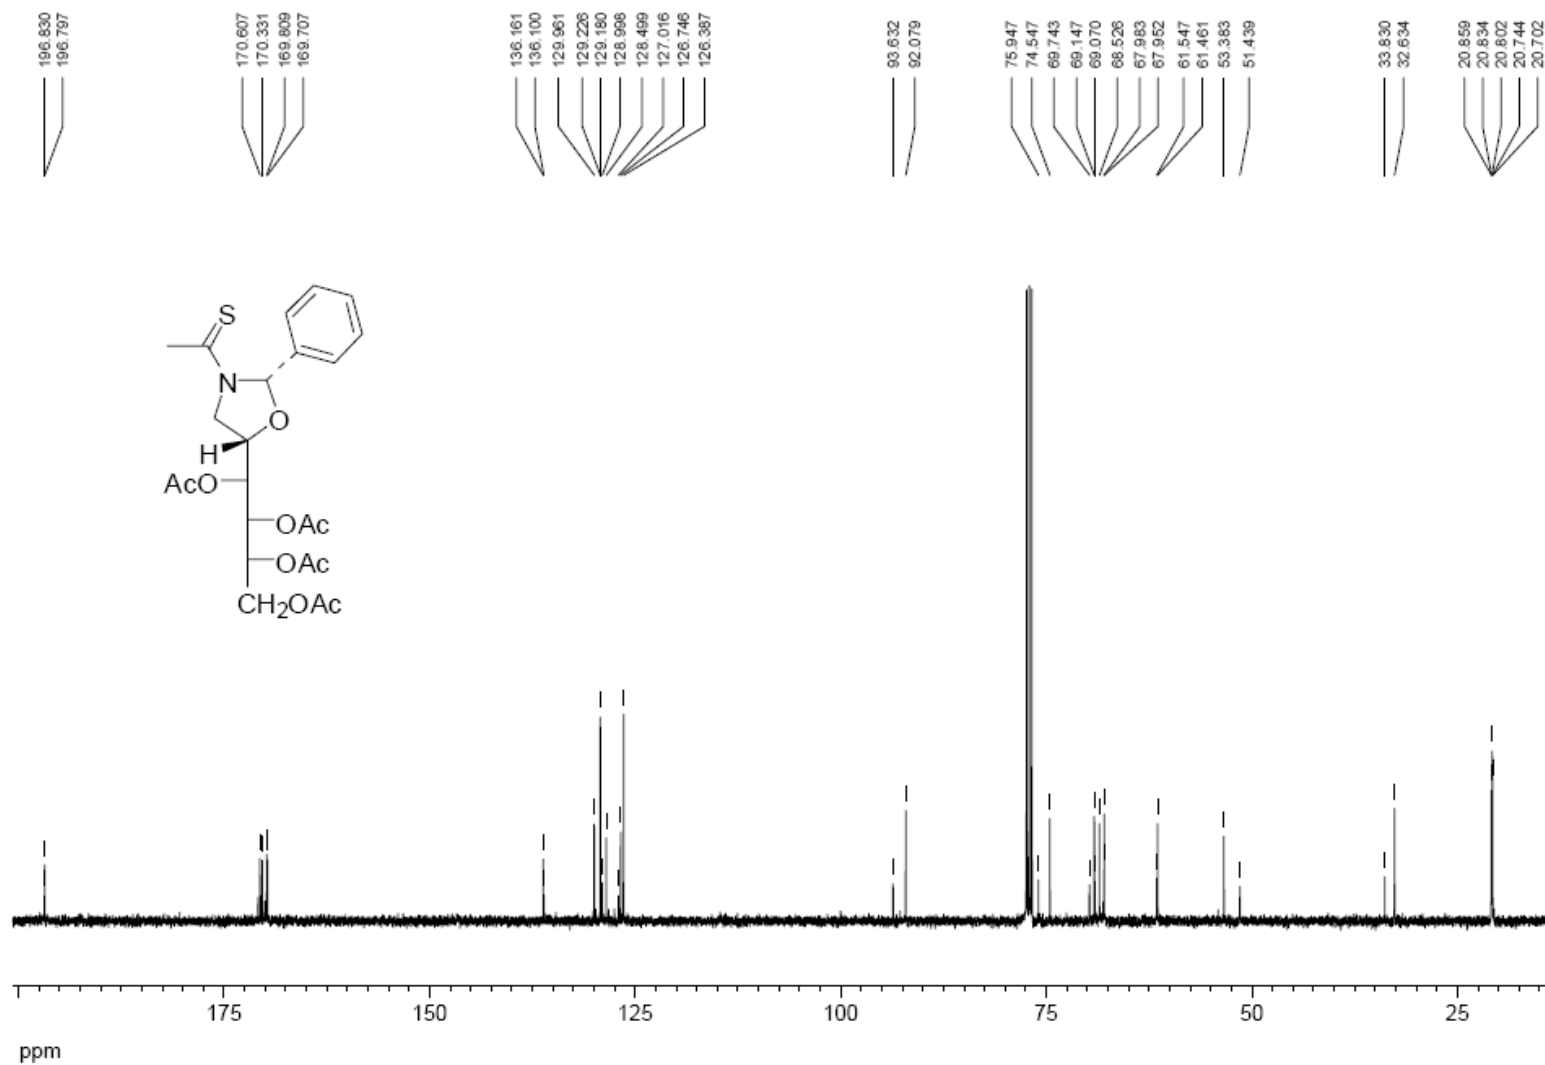

## THEORETICAL CALCULATIONS

### Cartesians coordinates for compound 1Z

E= -1904.989685 HF

Standard orientation:

| Center<br>Number | Atomic<br>Number | Atomic<br>Type | Coordinates (Angstroms) |           |           |
|------------------|------------------|----------------|-------------------------|-----------|-----------|
|                  |                  |                | X                       | Y         | Z         |
| 1                | 8                | 0              | 1.283601                | -0.192534 | 1.498851  |
| 2                | 6                | 0              | 2.136643                | -1.266642 | 1.140929  |
| 3                | 7                | 0              | 1.316322                | -2.079374 | 0.233538  |
| 4                | 6                | 0              | 0.265467                | -1.256574 | -0.359954 |
| 5                | 6                | 0              | 0.436360                | 0.097112  | 0.385863  |
| 6                | 6                | 0              | 3.446618                | -0.797378 | 0.511172  |
| 7                | 6                | 0              | 3.764315                | 0.562664  | 0.422044  |
| 8                | 6                | 0              | 4.970697                | 0.970342  | -0.145103 |
| 9                | 6                | 0              | 5.855612                | 0.000301  | -0.607065 |
| 10               | 6                | 0              | 5.570906                | -1.362205 | -0.513436 |
| 11               | 6                | 0              | 4.361611                | -1.756141 | 0.048542  |
| 12               | 7                | 0              | 7.129633                | 0.424369  | -1.208041 |
| 13               | 8                | 0              | 7.894049                | -0.453578 | -1.608527 |
| 14               | 6                | 0              | -0.881579               | 0.645952  | 0.955564  |
| 15               | 8                | 0              | -0.716208               | 1.655231  | 1.962859  |
| 16               | 6                | 0              | 0.070256                | 2.739098  | 1.743119  |
| 17               | 8                | 0              | 0.688429                | 2.940311  | 0.718846  |
| 18               | 6                | 0              | 1.323260                | -3.453850 | 0.323797  |
| 19               | 8                | 0              | 2.175805                | -4.034082 | 0.989585  |
| 20               | 6                | 0              | -1.911241               | 1.097180  | -0.138107 |
| 21               | 8                | 0              | -2.150718               | 2.501487  | -0.091591 |

|    |   |   |           |           |           |
|----|---|---|-----------|-----------|-----------|
| 22 | 6 | 0 | -1.708817 | 3.413632  | -1.033114 |
| 23 | 8 | 0 | -2.043303 | 4.557209  | -0.878188 |
| 24 | 6 | 0 | 0.251207  | -4.190445 | -0.457509 |
| 25 | 6 | 0 | -3.287267 | 0.433605  | 0.092587  |
| 26 | 8 | 0 | -3.068359 | -0.979945 | -0.034517 |
| 27 | 6 | 0 | -3.504125 | -1.931621 | 0.867519  |
| 28 | 8 | 0 | -3.078393 | -3.049701 | 0.718249  |
| 29 | 6 | 0 | 0.052885  | 3.648352  | 2.944157  |
| 30 | 6 | 0 | -4.330265 | 0.870916  | -0.937462 |
| 31 | 8 | 0 | -5.573864 | 0.239667  | -0.634644 |
| 32 | 6 | 0 | -6.077977 | -0.828197 | -1.334657 |
| 33 | 8 | 0 | -6.999658 | -1.428212 | -0.842710 |
| 34 | 6 | 0 | -0.859508 | 2.922722  | -2.183506 |
| 35 | 6 | 0 | -4.472129 | -1.522826 | 1.952371  |
| 36 | 6 | 0 | -5.468362 | -1.171917 | -2.677868 |
| 37 | 8 | 0 | 7.356423  | 1.632567  | -1.277499 |
| 38 | 1 | 0 | -5.462001 | -0.310448 | -3.354454 |
| 39 | 1 | 0 | -4.438406 | -1.525538 | -2.561941 |
| 40 | 1 | 0 | -0.719861 | -1.701642 | -0.199742 |
| 41 | 1 | 0 | -6.068493 | -1.969264 | -3.116215 |
| 42 | 1 | 0 | 6.291530  | -2.084949 | -0.875759 |
| 43 | 1 | 0 | -0.943786 | 4.091480  | 3.046312  |
| 44 | 1 | 0 | 5.232271  | 2.017904  | -0.229845 |
| 45 | 1 | 0 | 0.261519  | 3.082565  | 3.856701  |
| 46 | 1 | 0 | 4.122096  | -2.810819 | 0.143811  |
| 47 | 1 | 0 | 2.347841  | -1.851943 | 2.040239  |
| 48 | 1 | 0 | 3.068685  | 1.305237  | 0.797743  |
| 49 | 1 | 0 | 0.409525  | -1.125589 | -1.439786 |
| 50 | 1 | 0 | 0.916773  | 0.832469  | -0.262487 |
| 51 | 1 | 0 | -3.643146 | 0.690060  | 1.094055  |
| 52 | 1 | 0 | -1.323019 | -0.173626 | 1.526846  |
| 53 | 1 | 0 | -1.550330 | 0.791672  | -1.124981 |
| 54 | 1 | 0 | -4.493340 | 1.947748  | -0.860968 |
| 55 | 1 | 0 | -3.986630 | 0.632979  | -1.948236 |
| 56 | 1 | 0 | 0.458100  | -5.258843 | -0.386366 |

|    |   |   |           |           |           |
|----|---|---|-----------|-----------|-----------|
| 57 | 1 | 0 | 0.249259  | -3.891609 | -1.512135 |
| 58 | 1 | 0 | -0.749342 | -3.990759 | -0.054976 |
| 59 | 1 | 0 | -4.007180 | -0.823613 | 2.657096  |
| 60 | 1 | 0 | -4.756913 | -2.424768 | 2.494275  |
| 61 | 1 | 0 | -5.361882 | -1.045120 | 1.532355  |
| 62 | 1 | 0 | -0.620270 | 3.786909  | -2.803376 |
| 63 | 1 | 0 | -1.383599 | 2.182441  | -2.798248 |
| 64 | 1 | 0 | 0.068899  | 2.480281  | -1.812580 |
| 65 | 1 | 0 | 0.790160  | 4.439998  | 2.809151  |

-----

Cartesians coordinates for compound 1E

E= -1904.987392 HF

Standard orientation:

-----

| Center<br>Number | Atomic<br>Number | Atomic<br>Type | Coordinates (Angstroms) |           |           |
|------------------|------------------|----------------|-------------------------|-----------|-----------|
|                  |                  |                | X                       | Y         | Z         |
| 1                | 8                | 0              | -1.332463               | 0.767055  | 1.307437  |
| 2                | 6                | 0              | -2.295760               | 1.642451  | 0.739687  |
| 3                | 7                | 0              | -1.598471               | 2.260558  | -0.386441 |
| 4                | 6                | 0              | -0.410357               | 1.475753  | -0.731048 |
| 5                | 6                | 0              | -0.544867               | 0.264412  | 0.214309  |
| 6                | 6                | 0              | -3.567825               | 0.881431  | 0.354823  |
| 7                | 6                | 0              | -4.129311               | 0.953365  | -0.923695 |
| 8                | 6                | 0              | -5.298984               | 0.256602  | -1.226184 |
| 9                | 6                | 0              | -5.894593               | -0.511724 | -0.231179 |
| 10               | 6                | 0              | -5.354989               | -0.606946 | 1.051647  |
| 11               | 6                | 0              | -4.189100               | 0.094074  | 1.336014  |
| 12               | 6                | 0              | 0.791721                | -0.191911 | 0.808204  |
| 13               | 8                | 0              | 0.680594                | -1.156237 | 1.869078  |

-----



|    |   |   |           |           |           |
|----|---|---|-----------|-----------|-----------|
| 14 | 6 | 0 | -0.044856 | -2.297054 | 1.711162  |
| 15 | 8 | 0 | -0.677305 | -2.579775 | 0.718082  |
| 16 | 7 | 0 | -7.132422 | -1.247172 | -0.541586 |
| 17 | 8 | 0 | -7.583359 | -1.149801 | -1.682168 |
| 18 | 6 | 0 | -1.693144 | 3.571110  | -0.810024 |
| 19 | 8 | 0 | -0.903664 | 4.014250  | -1.631307 |
| 20 | 6 | 0 | 1.878211  | -0.633004 | -0.221864 |
| 21 | 8 | 0 | 2.022654  | -2.051756 | -0.283920 |
| 22 | 6 | 0 | 1.540679  | -2.858952 | -1.293744 |
| 23 | 8 | 0 | 1.845199  | -4.021306 | -1.255887 |
| 24 | 6 | 0 | 0.685336  | -2.239594 | -2.375296 |
| 25 | 6 | 0 | -2.812984 | 4.407349  | -0.211710 |
| 26 | 6 | 0 | 0.062565  | -3.152710 | 2.947927  |
| 27 | 6 | 0 | 3.265021  | -0.100883 | 0.209327  |
| 28 | 8 | 0 | 3.159524  | 1.324343  | 0.172123  |
| 29 | 6 | 0 | 3.747695  | 2.179334  | 1.088803  |
| 30 | 8 | 0 | 3.636524  | 3.357912  | 0.879776  |
| 31 | 6 | 0 | 4.449968  | 1.585571  | 2.288775  |
| 32 | 6 | 0 | 4.374077  | -0.555947 | -0.736016 |
| 33 | 8 | 0 | 5.605423  | -0.097884 | -0.170263 |
| 34 | 6 | 0 | 6.812144  | -0.281793 | -0.793776 |
| 35 | 8 | 0 | 7.804417  | 0.090840  | -0.222547 |
| 36 | 6 | 0 | 6.805488  | -0.933924 | -2.159756 |
| 37 | 8 | 0 | -7.640863 | -1.913157 | 0.359297  |
| 38 | 1 | 0 | -1.080461 | -0.556081 | -0.266761 |
| 39 | 1 | 0 | 4.798874  | 2.413765  | 2.905896  |
| 40 | 1 | 0 | -5.847987 | -1.221027 | 1.795024  |
| 41 | 1 | 0 | -5.748233 | 0.299204  | -2.210732 |
| 42 | 1 | 0 | -0.417792 | 1.185362  | -1.786440 |
| 43 | 1 | 0 | 1.179681  | 0.688320  | 1.324696  |
| 44 | 1 | 0 | -2.917233 | 5.310639  | -0.813987 |
| 45 | 1 | 0 | 0.494779  | 2.067663  | -0.549273 |
| 46 | 1 | 0 | 1.224252  | -1.468571 | -2.937227 |
| 47 | 1 | 0 | 7.838222  | -1.026704 | -2.495647 |
| 48 | 1 | 0 | 1.647013  | -0.212584 | -1.205187 |

|    |   |   |           |           |           |
|----|---|---|-----------|-----------|-----------|
| 49 | 1 | 0 | -3.769094 | 3.874916  | -0.181346 |
| 50 | 1 | 0 | -2.559382 | 4.704653  | 0.813676  |
| 51 | 1 | 0 | 0.396703  | -3.036053 | -3.061351 |
| 52 | 1 | 0 | 6.245978  | -0.328918 | -2.882193 |
| 53 | 1 | 0 | -3.745814 | 0.022726  | 2.324689  |
| 54 | 1 | 0 | -3.647417 | 1.551931  | -1.689576 |
| 55 | 1 | 0 | 3.479759  | -0.465078 | 1.218431  |
| 56 | 1 | 0 | -2.535689 | 2.383209  | 1.509974  |
| 57 | 1 | 0 | 6.343743  | -1.926940 | -2.129876 |
| 58 | 1 | 0 | 5.300996  | 0.974441  | 1.976805  |
| 59 | 1 | 0 | 4.367056  | -1.646636 | -0.813901 |
| 60 | 1 | 0 | 4.211359  | -0.112317 | -1.725872 |
| 61 | 1 | 0 | -0.661535 | -3.965642 | 2.887953  |
| 62 | 1 | 0 | 1.073039  | -3.572353 | 3.007089  |
| 63 | 1 | 0 | -0.215606 | -1.793011 | -1.946314 |
| 64 | 1 | 0 | -0.103353 | -2.555737 | 3.849068  |
| 65 | 1 | 0 | 3.774137  | 0.959180  | 2.882642  |

-----

Cartesians coordinates for compound 2Z

E= -1904.989246 HF

Standard orientation:

| Center<br>Number | Atomic<br>Number | Atomic<br>Type | Coordinates (Angstroms) |           |           |
|------------------|------------------|----------------|-------------------------|-----------|-----------|
|                  |                  |                | X                       | Y         | Z         |
| 1                | 8                | 0              | -1.319280               | 0.428077  | -1.478062 |
| 2                | 6                | 0              | -2.344786               | -0.514659 | -1.208761 |
| 3                | 7                | 0              | -1.671775               | -1.549640 | -0.418404 |
| 4                | 6                | 0              | -0.496920               | -0.984471 | 0.240161  |
| 5                | 6                | 0              | -0.435671               | 0.451687  | -0.356229 |

|    |   |   |           |           |           |
|----|---|---|-----------|-----------|-----------|
| 6  | 6 | 0 | -3.539507 | 0.110959  | -0.490040 |
| 7  | 6 | 0 | -3.651313 | 1.497051  | -0.337088 |
| 8  | 6 | 0 | -4.761431 | 2.055316  | 0.304451  |
| 9  | 6 | 0 | -5.777667 | 1.239830  | 0.791609  |
| 10 | 6 | 0 | -5.653488 | -0.139034 | 0.621094  |
| 11 | 6 | 0 | -4.558492 | -0.719471 | -0.010740 |
| 12 | 7 | 0 | -6.722753 | -1.014219 | 1.135281  |
| 13 | 8 | 0 | -6.580311 | -2.228963 | 1.008281  |
| 14 | 6 | 0 | 0.957148  | 0.828494  | -0.885731 |
| 15 | 8 | 0 | 0.969508  | 1.948818  | -1.783529 |
| 16 | 6 | 0 | 0.374823  | 3.120854  | -1.447221 |
| 17 | 8 | 0 | -0.212586 | 3.317030  | -0.403982 |
| 18 | 6 | 0 | -1.905521 | -2.884558 | -0.674932 |
| 19 | 8 | 0 | -2.841836 | -3.227259 | -1.389167 |
| 20 | 6 | 0 | 2.042829  | 0.987869  | 0.234548  |
| 21 | 8 | 0 | 2.508620  | 2.331820  | 0.333531  |
| 22 | 6 | 0 | 2.209667  | 3.201952  | 1.365832  |
| 23 | 8 | 0 | 2.718820  | 4.289551  | 1.322846  |
| 24 | 6 | 0 | -0.972706 | -3.877734 | -0.007913 |
| 25 | 6 | 0 | 3.292442  | 0.136800  | -0.081839 |
| 26 | 8 | 0 | 2.842711  | -1.226611 | -0.097751 |
| 27 | 6 | 0 | 3.124389  | -2.139201 | -1.096987 |
| 28 | 8 | 0 | 2.521813  | -3.182457 | -1.059167 |
| 29 | 6 | 0 | 0.562251  | 4.134791  | -2.545785 |
| 30 | 6 | 0 | 4.388021  | 0.290629  | 0.975753  |
| 31 | 8 | 0 | 5.505261  | -0.520108 | 0.614179  |
| 32 | 6 | 0 | 5.787405  | -1.730686 | 1.197821  |
| 33 | 8 | 0 | 6.597369  | -2.434468 | 0.650137  |
| 34 | 6 | 0 | 1.290326  | 2.735421  | 2.471897  |
| 35 | 6 | 0 | 4.153731  | -1.782297 | -2.142915 |
| 36 | 6 | 0 | 5.090567  | -2.094651 | 2.492255  |
| 37 | 8 | 0 | -7.694594 | -0.475347 | 1.666125  |
| 38 | 1 | 0 | 5.233502  | -1.326199 | 3.259829  |
| 39 | 1 | 0 | 4.015100  | -2.227773 | 2.334873  |
| 40 | 1 | 0 | 0.398543  | -1.570367 | 0.017251  |

|    |   |   |           |           |           |
|----|---|---|-----------|-----------|-----------|
| 41 | 1 | 0 | 5.516473  | -3.035214 | 2.841569  |
| 42 | 1 | 0 | 1.618097  | 4.423838  | -2.590471 |
| 43 | 1 | 0 | -4.831613 | 3.132621  | 0.422012  |
| 44 | 1 | 0 | 0.291766  | 3.707005  | -3.515293 |
| 45 | 1 | 0 | -4.512048 | -1.795103 | -0.136743 |
| 46 | 1 | 0 | -2.666492 | -0.952066 | -2.157588 |
| 47 | 1 | 0 | -2.864382 | 2.139918  | -0.717465 |
| 48 | 1 | 0 | -0.616597 | -0.946890 | 1.330317  |
| 49 | 1 | 0 | -0.786230 | 1.184254  | 0.373749  |
| 50 | 1 | 0 | 3.689231  | 0.432948  | -1.056712 |
| 51 | 1 | 0 | 1.257368  | 0.009298  | -1.542807 |
| 52 | 1 | 0 | 1.632766  | 0.642150  | 1.188522  |
| 53 | 1 | 0 | 4.739040  | 1.324299  | 0.992299  |
| 54 | 1 | 0 | 3.998701  | 0.031861  | 1.964848  |
| 55 | 1 | 0 | -1.354721 | -4.880216 | -0.203765 |
| 56 | 1 | 0 | -0.924472 | -3.714441 | 1.074867  |
| 57 | 1 | 0 | 0.048250  | -3.798988 | -0.400785 |
| 58 | 1 | 0 | 3.810124  | -0.952262 | -2.771297 |
| 59 | 1 | 0 | 4.297853  | -2.659459 | -2.773800 |
| 60 | 1 | 0 | 5.103559  | -1.494445 | -1.683512 |
| 61 | 1 | 0 | 1.191977  | 3.557076  | 3.181479  |
| 62 | 1 | 0 | 1.687485  | 1.860478  | 2.998444  |
| 63 | 1 | 0 | 0.303404  | 2.488291  | 2.071408  |
| 64 | 1 | 0 | -0.045194 | 5.014854  | -2.333418 |
| 65 | 1 | 0 | -6.650320 | 1.641545  | 1.291074  |

-----  
Cartesians coordinates for compound 2E

E= -1904.986958 HF

Standard orientation:  
-----

| Center<br>Number | Atomic<br>Number | Atomic<br>Type | Coordinates (Angstroms) |           |           |
|------------------|------------------|----------------|-------------------------|-----------|-----------|
|                  |                  |                | X                       | Y         | Z         |
| 1                | 8                | 0              | -1.411652               | 0.557784  | 1.469220  |
| 2                | 6                | 0              | -2.600205               | 1.140599  | 0.961662  |
| 3                | 7                | 0              | -2.170348               | 1.830321  | -0.250687 |
| 4                | 6                | 0              | -1.017743               | 1.110585  | -0.798716 |
| 5                | 6                | 0              | -0.659759               | 0.105969  | 0.332810  |
| 6                | 6                | 0              | -3.681482               | 0.086361  | 0.702201  |
| 7                | 6                | 0              | -4.684032               | 0.316492  | -0.240980 |
| 8                | 6                | 0              | -5.684455               | -0.637392 | -0.410582 |
| 9                | 6                | 0              | -5.716838               | -1.822349 | 0.321077  |
| 10               | 6                | 0              | -4.705360               | -2.048123 | 1.251889  |
| 11               | 6                | 0              | -3.696753               | -1.101595 | 1.445598  |
| 12               | 7                | 0              | -6.739676               | -0.385349 | -1.407877 |
| 13               | 8                | 0              | -6.688248               | 0.669110  | -2.040526 |
| 14               | 6                | 0              | 0.821520                | 0.156494  | 0.725491  |
| 15               | 8                | 0              | 1.142565                | -0.428500 | 2.004628  |
| 16               | 6                | 0              | 0.589968                | -1.596581 | 2.443917  |
| 17               | 8                | 0              | -0.255303               | -2.230963 | 1.858817  |
| 18               | 6                | 0              | -2.311713               | 3.181597  | -0.526607 |
| 19               | 8                | 0              | -1.641140               | 3.710597  | -1.399842 |
| 20               | 6                | 0              | 1.800164                | -0.390334 | -0.336564 |
| 21               | 8                | 0              | 1.827500                | -1.820939 | -0.309582 |
| 22               | 6                | 0              | 1.340026                | -2.647486 | -1.294291 |
| 23               | 8                | 0              | 1.507956                | -3.830605 | -1.160406 |
| 24               | 6                | 0              | 0.647325                | -2.027253 | -2.490940 |
| 25               | 6                | 0              | -3.342695               | 3.950345  | 0.284418  |
| 26               | 6                | 0              | 1.190898                | -1.968463 | 3.778337  |
| 27               | 6                | 0              | 3.243389                | 0.070438  | -0.030219 |
| 28               | 8                | 0              | 3.237625                | 1.495616  | -0.132341 |
| 29               | 6                | 0              | 3.905042                | 2.334164  | 0.742599  |
| 30               | 8                | 0              | 3.921957                | 3.505147  | 0.471339  |
| 31               | 6                | 0              | 4.528041                | 1.733369  | 1.982787  |
| 32               | 6                | 0              | 4.264026                | -0.493720 | -1.015040 |

|    |   |   |           |           |           |
|----|---|---|-----------|-----------|-----------|
| 33 | 8 | 0 | 5.548630  | -0.113892 | -0.511656 |
| 34 | 6 | 0 | 6.707478  | -0.346762 | -1.205175 |
| 35 | 8 | 0 | 7.749037  | -0.044282 | -0.682520 |
| 36 | 6 | 0 | 6.590653  | -0.958540 | -2.585027 |
| 37 | 8 | 0 | -7.610019 | -1.243666 | -1.546901 |
| 38 | 1 | 0 | -0.969040 | -0.908736 | 0.077079  |
| 39 | 1 | 0 | 4.939071  | 2.552864  | 2.572662  |
| 40 | 1 | 0 | -4.698017 | -2.969564 | 1.826016  |
| 41 | 1 | 0 | -1.274805 | 0.597761  | -1.731771 |
| 42 | 1 | 0 | 1.064930  | 1.212273  | 0.868315  |
| 43 | 1 | 0 | -3.518988 | 4.901625  | -0.218879 |
| 44 | 1 | 0 | -0.227226 | 1.835675  | -1.017744 |
| 45 | 1 | 0 | 1.323899  | -1.382035 | -3.062790 |
| 46 | 1 | 0 | 7.597610  | -1.118859 | -2.970143 |
| 47 | 1 | 0 | 1.514181  | -0.005752 | -1.320869 |
| 48 | 1 | 0 | -4.290860 | 3.413123  | 0.386904  |
| 49 | 1 | 0 | -2.961216 | 4.159548  | 1.291673  |
| 50 | 1 | 0 | 0.312578  | -2.841544 | -3.133595 |
| 51 | 1 | 0 | 6.050033  | -0.290377 | -3.265114 |
| 52 | 1 | 0 | -2.897980 | -1.293283 | 2.153954  |
| 53 | 1 | 0 | -4.693415 | 1.208853  | -0.854351 |
| 54 | 1 | 0 | 3.502466  | -0.263243 | 0.976618  |
| 55 | 1 | 0 | -2.949057 | 1.855009  | 1.712006  |
| 56 | 1 | 0 | 6.055109  | -1.913887 | -2.561063 |
| 57 | 1 | 0 | 5.329359  | 1.038499  | 1.715474  |
| 58 | 1 | 0 | 4.178901  | -1.583626 | -1.061334 |
| 59 | 1 | 0 | 4.089744  | -0.064085 | -2.008725 |
| 60 | 1 | 0 | 0.669079  | -2.838769 | 4.177141  |
| 61 | 1 | 0 | 2.252569  | -2.207121 | 3.652525  |
| 62 | 1 | 0 | -0.218393 | -1.426595 | -2.196665 |
| 63 | 1 | 0 | 1.120340  | -1.130234 | 4.478017  |
| 64 | 1 | 0 | 3.785020  | 1.194537  | 2.581831  |
| 65 | 1 | 0 | -6.511985 | -2.537029 | 0.149067  |

---

Cartesians coordinates for compound 3Z

E= -1792.734337 HF

Standard orientation:

| Center<br>Number | Atomic<br>Number | Atomic<br>Type | Coordinates (Angstroms) |           |           |
|------------------|------------------|----------------|-------------------------|-----------|-----------|
|                  |                  |                | X                       | Y         | Z         |
| 1                | 8                | 0              | 1.595062                | -0.163591 | 1.418195  |
| 2                | 6                | 0              | 2.452275                | -1.226527 | 1.035582  |
| 3                | 7                | 0              | 1.612760                | -2.054423 | 0.159378  |
| 4                | 6                | 0              | 0.532119                | -1.248059 | -0.402271 |
| 5                | 6                | 0              | 0.713838                | 0.112263  | 0.328870  |
| 6                | 6                | 0              | 3.732475                | -0.739763 | 0.359965  |
| 7                | 6                | 0              | 4.031808                | 0.623078  | 0.263691  |
| 8                | 6                | 0              | 5.211580                | 1.044995  | -0.345724 |
| 9                | 6                | 0              | 6.114368                | 0.099542  | -0.855306 |
| 10               | 6                | 0              | 5.824010                | -1.271913 | -0.743087 |
| 11               | 6                | 0              | 4.641985                | -1.683986 | -0.139490 |
| 12               | 6                | 0              | 7.328685                | 0.530185  | -1.485262 |
| 13               | 7                | 0              | 8.312832                | 0.880302  | -1.997749 |
| 14               | 6                | 0              | -0.591690               | 0.655239  | 0.931613  |
| 15               | 8                | 0              | -0.406260               | 1.670918  | 1.929168  |
| 16               | 6                | 0              | 0.367664                | 2.758163  | 1.684354  |
| 17               | 8                | 0              | 0.958096                | 2.958823  | 0.643674  |
| 18               | 6                | 0              | 1.640271                | -3.427946 | 0.254397  |
| 19               | 8                | 0              | 2.522479                | -3.995394 | 0.892155  |
| 20               | 6                | 0              | -1.652240               | 1.094287  | -0.137081 |
| 21               | 8                | 0              | -1.901618               | 2.496999  | -0.089301 |

|    |   |   |           |           |           |
|----|---|---|-----------|-----------|-----------|
| 22 | 6 | 0 | -1.489201 | 3.409466  | -1.043617 |
| 23 | 8 | 0 | -1.827705 | 4.551218  | -0.883554 |
| 24 | 6 | 0 | 0.551781  | -4.181290 | -0.487712 |
| 25 | 6 | 0 | -3.017231 | 0.421377  | 0.128805  |
| 26 | 8 | 0 | -2.791155 | -0.991134 | 0.003473  |
| 27 | 6 | 0 | -3.198144 | -1.941097 | 0.920695  |
| 28 | 8 | 0 | -2.767389 | -3.056706 | 0.767673  |
| 29 | 6 | 0 | 0.376114  | 3.672422  | 2.881770  |
| 30 | 6 | 0 | -4.086570 | 0.846107  | -0.879269 |
| 31 | 8 | 0 | -5.317906 | 0.205711  | -0.547112 |
| 32 | 6 | 0 | -5.826837 | -0.870040 | -1.231498 |
| 33 | 8 | 0 | -6.733728 | -1.474898 | -0.718479 |
| 34 | 6 | 0 | -0.665288 | 2.921329  | -2.213481 |
| 35 | 6 | 0 | -4.143890 | -1.533319 | 2.025475  |
| 36 | 6 | 0 | -5.240905 | -1.215889 | -2.584746 |
| 37 | 1 | 0 | -5.256139 | -0.358279 | -3.266088 |
| 38 | 1 | 0 | -4.205592 | -1.559310 | -2.487550 |
| 39 | 1 | 0 | -0.441829 | -1.702882 | -0.204549 |
| 40 | 1 | 0 | -5.842295 | -2.021181 | -3.006537 |
| 41 | 1 | 0 | 6.528187  | -2.002440 | -1.128424 |
| 42 | 1 | 0 | -0.620102 | 4.110420  | 3.007694  |
| 43 | 1 | 0 | 5.439010  | 2.103208  | -0.426345 |
| 44 | 1 | 0 | 0.611392  | 3.111702  | 3.790948  |
| 45 | 1 | 0 | 4.419613  | -2.742147 | -0.039672 |
| 46 | 1 | 0 | 2.700695  | -1.805344 | 1.929456  |
| 47 | 1 | 0 | 3.341592  | 1.356701  | 0.666450  |
| 48 | 1 | 0 | 0.636330  | -1.122767 | -1.487371 |
| 49 | 1 | 0 | 1.169610  | 0.846330  | -0.338583 |
| 50 | 1 | 0 | -3.351957 | 0.680255  | 1.136897  |
| 51 | 1 | 0 | -1.012435 | -0.163898 | 1.518902  |
| 52 | 1 | 0 | -1.313155 | 0.788324  | -1.131548 |
| 53 | 1 | 0 | -4.256896 | 1.921827  | -0.802979 |
| 54 | 1 | 0 | -3.763437 | 0.607456  | -1.896613 |
| 55 | 1 | 0 | 0.772371  | -5.246931 | -0.416211 |
| 56 | 1 | 0 | 0.513543  | -3.889779 | -1.543722 |



|    |   |   |           |           |           |
|----|---|---|-----------|-----------|-----------|
| 57 | 1 | 0 | -0.437947 | -3.989542 | -0.055666 |
| 58 | 1 | 0 | -3.668349 | -0.825886 | 2.714744  |
| 59 | 1 | 0 | -4.408615 | -2.434059 | 2.579408  |
| 60 | 1 | 0 | -5.047001 | -1.065506 | 1.623145  |
| 61 | 1 | 0 | -0.447640 | 3.785523  | -2.841241 |
| 62 | 1 | 0 | -1.199095 | 2.175780  | -2.813306 |
| 63 | 1 | 0 | 0.275018  | 2.486295  | -1.864449 |
| 64 | 1 | 0 | 1.105116  | 4.467661  | 2.724649  |

-----

Cartesians coordinates for compound 3E

E= -1792.731878 HF

Standard orientation:

-----

| Center<br>Number | Atomic<br>Number | Atomic<br>Type | Coordinates (Angstroms) |           |           |
|------------------|------------------|----------------|-------------------------|-----------|-----------|
|                  |                  |                | X                       | Y         | Z         |
| 1                | 8                | 0              | -1.641832               | 0.675680  | 1.280382  |
| 2                | 6                | 0              | -2.632648               | 1.512316  | 0.700964  |
| 3                | 7                | 0              | -1.943892               | 2.161907  | -0.413001 |
| 4                | 6                | 0              | -0.732260               | 1.412797  | -0.754591 |
| 5                | 6                | 0              | -0.829782               | 0.199401  | 0.194056  |
| 6                | 6                | 0              | -3.866104               | 0.702572  | 0.291821  |
| 7                | 6                | 0              | -4.435034               | 0.791732  | -0.981659 |
| 8                | 6                | 0              | -5.570827               | 0.051664  | -1.305466 |
| 9                | 6                | 0              | -6.150470               | -0.793434 | -0.347885 |
| 10               | 6                | 0              | -5.579208               | -0.891330 | 0.933511  |
| 11               | 6                | 0              | -4.447914               | -0.147332 | 1.243521  |
| 12               | 6                | 0              | 0.519579                | -0.206150 | 0.795659  |
| 13               | 8                | 0              | 0.440026                | -1.165313 | 1.864304  |
| 14               | 6                | 0              | -0.251680               | -2.328507 | 1.718256  |

-----

|    |   |   |           |           |           |
|----|---|---|-----------|-----------|-----------|
| 15 | 8 | 0 | -0.878944 | -2.638730 | 0.730256  |
| 16 | 6 | 0 | -7.320832 | -1.555738 | -0.674083 |
| 17 | 7 | 0 | -8.271110 | -2.172597 | -0.937805 |
| 18 | 6 | 0 | -2.069389 | 3.473714  | -0.822980 |
| 19 | 8 | 0 | -1.284862 | 3.947127  | -1.632286 |
| 20 | 6 | 0 | 1.622530  | -0.619329 | -0.227470 |
| 21 | 8 | 0 | 1.801927  | -2.034363 | -0.289720 |
| 22 | 6 | 0 | 1.341151  | -2.853399 | -1.299646 |
| 23 | 8 | 0 | 1.672327  | -4.008409 | -1.260135 |
| 24 | 6 | 0 | 0.475145  | -2.254886 | -2.384470 |
| 25 | 6 | 0 | -3.216576 | 4.273691  | -0.226377 |
| 26 | 6 | 0 | -0.114316 | -3.169581 | 2.962239  |
| 27 | 6 | 0 | 2.993485  | -0.054446 | 0.212577  |
| 28 | 8 | 0 | 2.855413  | 1.367971  | 0.173344  |
| 29 | 6 | 0 | 3.420592  | 2.236333  | 1.091935  |
| 30 | 8 | 0 | 3.290498  | 3.412109  | 0.878277  |
| 31 | 6 | 0 | 4.122513  | 1.658607  | 2.299868  |
| 32 | 6 | 0 | 4.119450  | -0.483925 | -0.724834 |
| 33 | 8 | 0 | 5.335795  | 0.003441  | -0.150942 |
| 34 | 6 | 0 | 6.550535  | -0.151175 | -0.766631 |
| 35 | 8 | 0 | 7.529825  | 0.246133  | -0.189623 |
| 36 | 6 | 0 | 6.568445  | -0.804821 | -2.131818 |
| 37 | 1 | 0 | -1.332428 | -0.641264 | -0.287518 |
| 38 | 1 | 0 | 4.449825  | 2.494505  | 2.918434  |
| 39 | 1 | 0 | -6.025474 | -1.550745 | 1.670773  |
| 40 | 1 | 0 | -6.009136 | 0.122254  | -2.295718 |
| 41 | 1 | 0 | -0.728844 | 1.119222  | -1.809221 |
| 42 | 1 | 0 | 0.876812  | 0.690906  | 1.305421  |
| 43 | 1 | 0 | -3.341039 | 5.178821  | -0.822061 |
| 44 | 1 | 0 | 0.153752  | 2.032939  | -0.573192 |
| 45 | 1 | 0 | 0.997886  | -1.471562 | -2.944655 |
| 46 | 1 | 0 | 7.605296  | -0.873512 | -2.460767 |
| 47 | 1 | 0 | 1.387021  | -0.203549 | -1.211814 |
| 48 | 1 | 0 | -4.157990 | 3.715157  | -0.207446 |
| 49 | 1 | 0 | -2.978722 | 4.569429  | 0.803204  |

|    |   |   |           |           |           |
|----|---|---|-----------|-----------|-----------|
| 50 | 1 | 0 | 0.207753  | -3.058189 | -3.071152 |
| 51 | 1 | 0 | 5.999579  | -0.214041 | -2.858717 |
| 52 | 1 | 0 | -3.998599 | -0.233880 | 2.228290  |
| 53 | 1 | 0 | -3.983097 | 1.437160  | -1.727782 |
| 54 | 1 | 0 | 3.209751  | -0.412799 | 1.223411  |
| 55 | 1 | 0 | -2.912084 | 2.240810  | 1.469438  |
| 56 | 1 | 0 | 6.130063  | -1.808391 | -2.103531 |
| 57 | 1 | 0 | 4.988019  | 1.063516  | 1.996947  |
| 58 | 1 | 0 | 4.138862  | -1.574489 | -0.802189 |
| 59 | 1 | 0 | 3.953074  | -0.044626 | -1.716003 |
| 60 | 1 | 0 | -0.810483 | -4.007090 | 2.910072  |
| 61 | 1 | 0 | 0.909839  | -3.554117 | 3.024313  |
| 62 | 1 | 0 | -0.437692 | -1.829074 | -1.959608 |
| 63 | 1 | 0 | -0.299828 | -2.570779 | 3.858376  |
| 64 | 1 | 0 | 3.453190  | 1.020414  | 2.888495  |

-----

Cartesians coordinates for compound 4Z

E= -2037.525349 HF

Standard orientation:

| Center<br>Number | Atomic<br>Number | Atomic<br>Type | Coordinates (Angstroms) |           |           |
|------------------|------------------|----------------|-------------------------|-----------|-----------|
|                  |                  |                | X                       | Y         | Z         |
| 1                | 8                | 0              | 0.978848                | -0.220826 | 1.583413  |
| 2                | 6                | 0              | 1.824727                | -1.309199 | 1.245079  |
| 3                | 7                | 0              | 1.014276                | -2.100591 | 0.311018  |
| 4                | 6                | 0              | 0.026000                | -1.243186 | -0.335602 |
| 5                | 6                | 0              | 0.177073                | 0.094881  | 0.445007  |
| 6                | 6                | 0              | 3.158723                | -0.859849 | 0.654275  |

|    |   |   |           |           |           |
|----|---|---|-----------|-----------|-----------|
| 7  | 6 | 0 | 3.516655  | 0.490573  | 0.606595  |
| 8  | 6 | 0 | 4.748098  | 0.874579  | 0.074766  |
| 9  | 6 | 0 | 5.634946  | -0.092403 | -0.400536 |
| 10 | 6 | 0 | 5.289499  | -1.446430 | -0.338837 |
| 11 | 6 | 0 | 4.058874  | -1.827706 | 0.187008  |
| 12 | 6 | 0 | 6.936044  | 0.323246  | -1.029805 |
| 13 | 9 | 0 | 6.802262  | 0.534760  | -2.362087 |
| 14 | 6 | 0 | -1.160243 | 0.635207  | 0.976145  |
| 15 | 8 | 0 | -1.032514 | 1.628783  | 2.004792  |
| 16 | 6 | 0 | -0.237558 | 2.715079  | 1.832454  |
| 17 | 8 | 0 | 0.412437  | 2.937646  | 0.832952  |
| 18 | 6 | 0 | 0.979695  | -3.474255 | 0.393654  |
| 19 | 8 | 0 | 1.784909  | -4.082459 | 1.092642  |
| 20 | 6 | 0 | -2.155439 | 1.100970  | -0.141892 |
| 21 | 8 | 0 | -2.382802 | 2.507775  | -0.098340 |
| 22 | 6 | 0 | -1.897813 | 3.418644  | -1.018705 |
| 23 | 8 | 0 | -2.231645 | 4.564165  | -0.875861 |
| 24 | 6 | 0 | -0.076820 | -4.177604 | -0.438873 |
| 25 | 6 | 0 | -3.544295 | 0.452519  | 0.052349  |
| 26 | 8 | 0 | -3.340775 | -0.962851 | -0.079945 |
| 27 | 6 | 0 | -3.817574 | -1.914925 | 0.800444  |
| 28 | 8 | 0 | -3.420026 | -3.042021 | 0.642809  |
| 29 | 6 | 0 | -0.290118 | 3.597585  | 3.052712  |
| 30 | 6 | 0 | -4.558099 | 0.909975  | -0.998063 |
| 31 | 8 | 0 | -5.817125 | 0.293350  | -0.729362 |
| 32 | 6 | 0 | -6.315691 | -0.767110 | -1.444216 |
| 33 | 8 | 0 | -7.262026 | -1.351841 | -0.981418 |
| 34 | 6 | 0 | -1.005524 | 2.924533  | -2.134705 |
| 35 | 6 | 0 | -4.791267 | -1.494462 | 1.875864  |
| 36 | 6 | 0 | -5.668998 | -1.122713 | -2.766859 |
| 37 | 9 | 0 | 7.410908  | 1.473103  | -0.500139 |
| 38 | 9 | 0 | 7.893926  | -0.618764 | -0.879867 |
| 39 | 1 | 0 | -5.631880 | -0.263683 | -3.445610 |
| 40 | 1 | 0 | -4.647295 | -1.487577 | -2.617915 |
| 41 | 1 | 0 | -0.977790 | -1.667636 | -0.250064 |

|    |   |   |           |           |           |
|----|---|---|-----------|-----------|-----------|
| 42 | 1 | 0 | -6.264775 | -1.914420 | -3.221073 |
| 43 | 1 | 0 | 5.987163  | -2.198268 | -0.693052 |
| 44 | 1 | 0 | -1.289782 | 4.037537  | 3.137698  |
| 45 | 1 | 0 | 5.021396  | 1.924216  | 0.039940  |
| 46 | 1 | 0 | -0.105652 | 3.011493  | 3.957646  |
| 47 | 1 | 0 | 3.793911  | -2.878751 | 0.252625  |
| 48 | 1 | 0 | 1.994902  | -1.902966 | 2.147160  |
| 49 | 1 | 0 | 2.834524  | 1.242706  | 0.988875  |
| 50 | 1 | 0 | 0.245704  | -1.096120 | -1.400723 |
| 51 | 1 | 0 | 0.685079  | 0.840568  | -0.169401 |
| 52 | 1 | 0 | -3.919315 | 0.706685  | 1.047379  |
| 53 | 1 | 0 | -1.618464 | -0.194666 | 1.518838  |
| 54 | 1 | 0 | -1.773290 | 0.794388  | -1.120401 |
| 55 | 1 | 0 | -4.709527 | 1.988116  | -0.917241 |
| 56 | 1 | 0 | -4.194231 | 0.675192  | -2.002478 |
| 57 | 1 | 0 | 0.101206  | -5.251300 | -0.368732 |
| 58 | 1 | 0 | -0.027754 | -3.870808 | -1.490091 |
| 59 | 1 | 0 | -1.088188 | -3.957740 | -0.075823 |
| 60 | 1 | 0 | -4.318379 | -0.817906 | 2.597235  |
| 61 | 1 | 0 | -5.108854 | -2.395671 | 2.400463  |
| 62 | 1 | 0 | -5.661310 | -0.987309 | 1.449187  |
| 63 | 1 | 0 | -0.736572 | 3.788110  | -2.743172 |
| 64 | 1 | 0 | -1.508513 | 2.188010  | -2.771205 |
| 65 | 1 | 0 | -0.095448 | 2.476154  | -1.727263 |
| 66 | 1 | 0 | 0.449721  | 4.392415  | 2.955913  |

-----  
Cartesians coordinates for compound 4E

E= -2037.523857 HF

Standard orientation:

-----  
Center      Atomic      Atomic      Coordinates (Angstroms)  
-----

| Number | Number | Type | X         | Y         | Z         |
|--------|--------|------|-----------|-----------|-----------|
| 1      | 8      | 0    | -1.024470 | 0.865803  | 1.305821  |
| 2      | 6      | 0    | -1.981900 | 1.749268  | 0.736540  |
| 3      | 7      | 0    | -1.288173 | 2.329240  | -0.413159 |
| 4      | 6      | 0    | -0.121799 | 1.515501  | -0.759772 |
| 5      | 6      | 0    | -0.265290 | 0.326213  | 0.211613  |
| 6      | 6      | 0    | -3.276225 | 1.011446  | 0.388852  |
| 7      | 6      | 0    | -3.837945 | 1.033464  | -0.889330 |
| 8      | 6      | 0    | -5.029570 | 0.354745  | -1.152260 |
| 9      | 6      | 0    | -5.665046 | -0.354458 | -0.134017 |
| 10     | 6      | 0    | -5.106134 | -0.388027 | 1.148724  |
| 11     | 6      | 0    | -3.920683 | 0.291305  | 1.404802  |
| 12     | 6      | 0    | 1.072007  | -0.141856 | 0.794691  |
| 13     | 8      | 0    | 0.960131  | -1.088200 | 1.872326  |
| 14     | 6      | 0    | 0.212067  | -2.218307 | 1.743615  |
| 15     | 8      | 0    | -0.433334 | -2.510852 | 0.762127  |
| 16     | 6      | 0    | -6.979394 | -1.042255 | -0.389687 |
| 17     | 9      | 0    | -7.152947 | -1.334218 | -1.696834 |
| 18     | 6      | 0    | -1.379462 | 3.623106  | -0.881075 |
| 19     | 8      | 0    | -0.600127 | 4.031603  | -1.730657 |
| 20     | 6      | 0    | 2.143485  | -0.613390 | -0.235478 |
| 21     | 8      | 0    | 2.243952  | -2.035876 | -0.305716 |
| 22     | 6      | 0    | 1.727218  | -2.824704 | -1.311854 |
| 23     | 8      | 0    | 2.004575  | -3.994373 | -1.286253 |
| 24     | 6      | 0    | 0.868101  | -2.179073 | -2.374830 |
| 25     | 6      | 0    | -2.482738 | 4.488212  | -0.293303 |
| 26     | 6      | 0    | 0.312368  | -3.048043 | 2.998886  |
| 27     | 6      | 0    | 3.546054  | -0.130012 | 0.202319  |
| 28     | 8      | 0    | 3.493864  | 1.298039  | 0.159526  |
| 29     | 6      | 0    | 4.112237  | 2.131634  | 1.075387  |
| 30     | 8      | 0    | 4.065615  | 3.312233  | 0.853589  |
| 31     | 6      | 0    | 4.764318  | 1.515472  | 2.292644  |
| 32     | 6      | 0    | 4.644549  | -0.627393 | -0.733897 |
| 33     | 8      | 0    | 5.887148  | -0.209078 | -0.161126 |

|    |   |   |           |           |           |
|----|---|---|-----------|-----------|-----------|
| 34 | 6 | 0 | 7.089932  | -0.429185 | -0.779665 |
| 35 | 8 | 0 | 8.091587  | -0.093879 | -0.201484 |
| 36 | 6 | 0 | 7.068482  | -1.070531 | -2.150708 |
| 37 | 9 | 0 | -7.081527 | -2.197953 | 0.303808  |
| 38 | 9 | 0 | -8.025674 | -0.268889 | -0.015014 |
| 39 | 1 | 0 | -0.824104 | -0.492851 | -0.244777 |
| 40 | 1 | 0 | 5.138283  | 2.331670  | 2.911079  |
| 41 | 1 | 0 | -5.595042 | -0.951852 | 1.936649  |
| 42 | 1 | 0 | -5.457327 | 0.370930  | -2.149015 |
| 43 | 1 | 0 | -0.150804 | 1.205024  | -1.809160 |
| 44 | 1 | 0 | 1.478356  | 0.740914  | 1.292641  |
| 45 | 1 | 0 | -2.582324 | 5.377262  | -0.917190 |
| 46 | 1 | 0 | 0.797904  | 2.092449  | -0.603154 |
| 47 | 1 | 0 | 1.410333  | -1.408465 | -2.934002 |
| 48 | 1 | 0 | 8.099362  | -1.199005 | -2.480493 |
| 49 | 1 | 0 | 1.929203  | -0.179355 | -1.216751 |
| 50 | 1 | 0 | -3.443799 | 3.966573  | -0.241138 |
| 51 | 1 | 0 | -2.216592 | 4.807249  | 0.722325  |
| 52 | 1 | 0 | 0.558272  | -2.962300 | -3.066841 |
| 53 | 1 | 0 | 6.537024  | -0.439113 | -2.871768 |
| 54 | 1 | 0 | -3.479310 | 0.253281  | 2.396685  |
| 55 | 1 | 0 | -3.341375 | 1.578035  | -1.686007 |
| 56 | 1 | 0 | 3.741230  | -0.498127 | 1.213843  |
| 57 | 1 | 0 | -2.188162 | 2.510783  | 1.496326  |
| 58 | 1 | 0 | 6.569596  | -2.045684 | -2.132332 |
| 59 | 1 | 0 | 5.593684  | 0.865662  | 2.000845  |
| 60 | 1 | 0 | 4.601179  | -1.717505 | -0.806996 |
| 61 | 1 | 0 | 4.503737  | -0.182983 | -1.726684 |
| 62 | 1 | 0 | -0.413121 | -3.860599 | 2.952570  |
| 63 | 1 | 0 | 1.321895  | -3.467049 | 3.074708  |
| 64 | 1 | 0 | -0.020143 | -1.724860 | -1.927602 |
| 65 | 1 | 0 | 0.141022  | -2.430884 | 3.885452  |
| 66 | 1 | 0 | 4.050241  | 0.923492  | 2.876860  |

---

Cartesians coordinates for compound 6Z

E= -1928.321962 HF

Standard orientation:

| Center<br>Number | Atomic<br>Number | Atomic<br>Type | Coordinates (Angstroms) |           |           |
|------------------|------------------|----------------|-------------------------|-----------|-----------|
|                  |                  |                | X                       | Y         | Z         |
| 1                | 8                | 0              | 1.035891                | -0.207227 | 1.428763  |
| 2                | 6                | 0              | 1.864907                | -1.298168 | 1.055883  |
| 3                | 7                | 0              | 1.001351                | -2.103434 | 0.183040  |
| 4                | 6                | 0              | -0.020391               | -1.254930 | -0.421325 |
| 5                | 6                | 0              | 0.173368                | 0.093710  | 0.331941  |
| 6                | 6                | 0              | 3.158540                | -0.850807 | 0.380501  |
| 7                | 6                | 0              | 3.506785                | 0.500399  | 0.293584  |
| 8                | 6                | 0              | 4.700298                | 0.886981  | -0.320258 |
| 9                | 6                | 0              | 5.554580                | -0.086475 | -0.832010 |
| 10               | 6                | 0              | 5.224509                | -1.440338 | -0.748326 |
| 11               | 6                | 0              | 4.030477                | -1.818497 | -0.139103 |
| 12               | 8                | 0              | 6.707780                | 0.299760  | -1.509183 |
| 13               | 6                | 0              | 7.924443                | 0.436661  | -0.873518 |
| 14               | 6                | 0              | 7.967204                | 0.149786  | 0.612006  |
| 15               | 6                | 0              | -1.133283               | 0.644273  | 0.925485  |
| 16               | 8                | 0              | -0.950538               | 1.646423  | 1.937660  |
| 17               | 6                | 0              | -0.159232               | 2.726428  | 1.717427  |
| 18               | 8                | 0              | 0.446185                | 2.935163  | 0.687353  |
| 19               | 6                | 0              | 0.979551                | -3.475590 | 0.279019  |
| 20               | 8                | 0              | 1.829331                | -4.073735 | 0.933230  |
| 21               | 6                | 0              | -2.178088               | 1.106552  | -0.147732 |



|    |   |   |           |           |           |
|----|---|---|-----------|-----------|-----------|
| 22 | 8 | 0 | -2.396730 | 2.514835  | -0.104020 |
| 23 | 6 | 0 | -1.951471 | 3.417039  | -1.052816 |
| 24 | 8 | 0 | -2.270690 | 4.565542  | -0.900710 |
| 25 | 6 | 0 | -0.121373 | -4.192144 | -0.481878 |
| 26 | 6 | 0 | -3.559384 | 0.466441  | 0.113937  |
| 27 | 8 | 0 | -3.368291 | -0.950844 | -0.015486 |
| 28 | 6 | 0 | -3.809765 | -1.893339 | 0.893341  |
| 29 | 8 | 0 | -3.422723 | -3.023146 | 0.729257  |
| 30 | 6 | 0 | -0.153542 | 3.623049  | 2.928562  |
| 31 | 6 | 0 | -4.616213 | 0.920726  | -0.894631 |
| 32 | 8 | 0 | -5.863476 | 0.307413  | -0.570046 |
| 33 | 6 | 0 | -6.394276 | -0.753414 | -1.260963 |
| 34 | 8 | 0 | -7.321482 | -1.335012 | -0.757385 |
| 35 | 6 | 0 | -1.117777 | 2.910713  | -2.207847 |
| 36 | 6 | 0 | -4.736098 | -1.459827 | 2.005005  |
| 37 | 6 | 0 | -5.804960 | -1.112848 | -2.609256 |
| 38 | 8 | 0 | 8.872401  | 0.773947  | -1.532294 |
| 39 | 1 | 0 | -5.795793 | -0.255341 | -3.290879 |
| 40 | 1 | 0 | -4.778328 | -1.478956 | -2.503630 |
| 41 | 1 | 0 | -1.018281 | -1.677042 | -0.276642 |
| 42 | 1 | 0 | -6.420825 | -1.904586 | -3.035780 |
| 43 | 1 | 0 | 5.898075  | -2.181290 | -1.168584 |
| 44 | 1 | 0 | -1.146455 | 4.069100  | 3.052119  |
| 45 | 1 | 0 | 4.968094  | 1.935305  | -0.412305 |
| 46 | 1 | 0 | 0.067751  | 3.046532  | 3.831386  |
| 47 | 1 | 0 | 3.770653  | -2.869788 | -0.056619 |
| 48 | 1 | 0 | 2.087244  | -1.879450 | 1.954619  |
| 49 | 1 | 0 | 2.843360  | 1.255433  | 0.702583  |
| 50 | 1 | 0 | 0.141967  | -1.122390 | -1.498608 |
| 51 | 1 | 0 | 0.646974  | 0.830114  | -0.320014 |
| 52 | 1 | 0 | -3.888803 | 0.730196  | 1.122461  |
| 53 | 1 | 0 | -1.569090 | -0.177908 | 1.497451  |
| 54 | 1 | 0 | -1.842635 | 0.790896  | -1.140433 |
| 55 | 1 | 0 | -4.762028 | 1.999604  | -0.813058 |
| 56 | 1 | 0 | -4.295630 | 0.680358  | -1.912352 |

|    |   |   |           |           |           |
|----|---|---|-----------|-----------|-----------|
| 57 | 1 | 0 | 0.059490  | -5.264707 | -0.402269 |
| 58 | 1 | 0 | -0.128320 | -3.904564 | -1.539687 |
| 59 | 1 | 0 | -1.111911 | -3.963867 | -0.070049 |
| 60 | 1 | 0 | -4.233073 | -0.774112 | 2.696649  |
| 61 | 1 | 0 | -5.030209 | -2.354527 | 2.553872  |
| 62 | 1 | 0 | -5.624043 | -0.958245 | 1.609646  |
| 63 | 1 | 0 | -0.872441 | 3.769160  | -2.833300 |
| 64 | 1 | 0 | -1.656078 | 2.174686  | -2.815396 |
| 65 | 1 | 0 | -0.192320 | 2.457609  | -1.842627 |
| 66 | 1 | 0 | 0.584771  | 4.413153  | 2.790039  |
| 67 | 1 | 0 | 7.284354  | 0.806714  | 1.160107  |
| 68 | 1 | 0 | 7.661058  | -0.879718 | 0.823280  |
| 69 | 1 | 0 | 8.988891  | 0.308460  | 0.957460  |

-----

Cartesians coordinates for compound 6E

E= -1928.321271 HF

Standard orientation:

| Center<br>Number | Atomic<br>Number | Atomic<br>Type | Coordinates (Angstroms) |           |           |
|------------------|------------------|----------------|-------------------------|-----------|-----------|
|                  |                  |                | X                       | Y         | Z         |
| 1                | 8                | 0              | -1.046578               | 0.711533  | 1.293185  |
| 2                | 6                | 0              | -2.030821               | 1.564412  | 0.722072  |
| 3                | 7                | 0              | -1.341559               | 2.190832  | -0.406544 |
| 4                | 6                | 0              | -0.144165               | 1.422991  | -0.752588 |
| 5                | 6                | 0              | -0.254462               | 0.215956  | 0.202131  |
| 6                | 6                | 0              | -3.287410               | 0.782477  | 0.336872  |
| 7                | 6                | 0              | -3.834811               | 0.816184  | -0.948294 |
| 8                | 6                | 0              | -4.990106               | 0.091916  | -1.251208 |
| 9                | 6                | 0              | -5.601937               | -0.668078 | -0.257485 |

|    |   |   |           |           |           |
|----|---|---|-----------|-----------|-----------|
| 10 | 6 | 0 | -5.061584 | -0.726438 | 1.029391  |
| 11 | 6 | 0 | -3.911059 | 0.000611  | 1.319818  |
| 12 | 6 | 0 | 1.093475  | -0.208377 | 0.794365  |
| 13 | 8 | 0 | 1.007291  | -1.169398 | 1.861201  |
| 14 | 6 | 0 | 0.304279  | -2.325402 | 1.713278  |
| 15 | 8 | 0 | -0.320221 | -2.631477 | 0.722392  |
| 16 | 8 | 0 | -6.708336 | -1.447031 | -0.572395 |
| 17 | 6 | 0 | -8.003222 | -0.986134 | -0.428206 |
| 18 | 6 | 0 | -8.182016 | 0.426744  | 0.083652  |
| 19 | 6 | 0 | -1.470036 | 3.489329  | -0.849948 |
| 20 | 8 | 0 | -0.695609 | 3.941641  | -1.681771 |
| 21 | 6 | 0 | 2.189343  | -0.629000 | -0.233175 |
| 22 | 8 | 0 | 2.357545  | -2.045189 | -0.302192 |
| 23 | 6 | 0 | 1.883971  | -2.856914 | -1.311928 |
| 24 | 8 | 0 | 2.215113  | -4.012437 | -1.284186 |
| 25 | 6 | 0 | 1.002927  | -2.251196 | -2.380274 |
| 26 | 6 | 0 | -2.608250 | 4.306202  | -0.258653 |
| 27 | 6 | 0 | 0.425245  | -3.165249 | 2.959990  |
| 28 | 6 | 0 | 3.566931  | -0.079497 | 0.206102  |
| 29 | 8 | 0 | 3.445026  | 1.344620  | 0.171653  |
| 30 | 6 | 0 | 4.020196  | 2.202655  | 1.092988  |
| 31 | 8 | 0 | 3.906923  | 3.380870  | 0.882576  |
| 32 | 6 | 0 | 4.711981  | 1.612427  | 2.300930  |
| 33 | 6 | 0 | 4.686984  | -0.517558 | -0.734267 |
| 34 | 8 | 0 | 5.909287  | -0.044190 | -0.160630 |
| 35 | 6 | 0 | 7.120875  | -0.208166 | -0.779410 |
| 36 | 8 | 0 | 8.105651  | 0.176248  | -0.202778 |
| 37 | 6 | 0 | 7.129432  | -0.855139 | -2.147935 |
| 38 | 8 | 0 | -8.902501 | -1.728882 | -0.717168 |
| 39 | 1 | 0 | -0.776061 | -0.617522 | -0.271830 |
| 40 | 1 | 0 | 5.048261  | 2.442319  | 2.922773  |
| 41 | 1 | 0 | -5.537219 | -1.350360 | 1.779936  |
| 42 | 1 | 0 | -5.410077 | 0.099760  | -2.252409 |
| 43 | 1 | 0 | -0.152476 | 1.125346  | -1.806101 |
| 44 | 1 | 0 | 1.462252  | 0.683224  | 1.305500  |

|    |   |   |           |           |           |
|----|---|---|-----------|-----------|-----------|
| 45 | 1 | 0 | -2.736959 | 5.198446  | -0.872650 |
| 46 | 1 | 0 | 0.752968  | 2.029758  | -0.579601 |
| 47 | 1 | 0 | 1.514269  | -1.458802 | -2.938113 |
| 48 | 1 | 0 | 8.164943  | -0.933548 | -2.478934 |
| 49 | 1 | 0 | 1.955838  | -0.207074 | -1.215326 |
| 50 | 1 | 0 | -3.549681 | 3.748953  | -0.217645 |
| 51 | 1 | 0 | -2.358751 | 4.622911  | 0.761893  |
| 52 | 1 | 0 | 0.731209  | -3.048386 | -3.072374 |
| 53 | 1 | 0 | 6.565945  | -0.254398 | -2.870847 |
| 54 | 1 | 0 | -3.478878 | -0.052039 | 2.315211  |
| 55 | 1 | 0 | -3.352304 | 1.404003  | -1.722757 |
| 56 | 1 | 0 | 3.780982  | -0.443369 | 1.215403  |
| 57 | 1 | 0 | -2.276507 | 2.304842  | 1.490826  |
| 58 | 1 | 0 | 6.679910  | -1.853876 | -2.124141 |
| 59 | 1 | 0 | 5.570852  | 1.007587  | 1.998329  |
| 60 | 1 | 0 | 4.695341  | -1.607967 | -0.814802 |
| 61 | 1 | 0 | 4.523719  | -0.073598 | -1.723841 |
| 62 | 1 | 0 | -0.272711 | -4.000774 | 2.900742  |
| 63 | 1 | 0 | 1.447613  | -3.551964 | 3.035828  |
| 64 | 1 | 0 | 0.093456  | -1.835728 | -1.938282 |
| 65 | 1 | 0 | 0.229835  | -2.564235 | 3.852603  |
| 66 | 1 | 0 | 4.033301  | 0.980839  | 2.885920  |
| 67 | 1 | 0 | -7.736557 | 0.545240  | 1.076632  |
| 68 | 1 | 0 | -7.694137 | 1.150017  | -0.577589 |
| 69 | 1 | 0 | -9.250750 | 0.635559  | 0.133067  |

-----  
Cartesians coordinates for compound 7Z

E= -2160.094282 HF

Standard orientation:  
-----

| Center<br>Number | Atomic<br>Number | Atomic<br>Type | Coordinates (Angstroms) |           |           |
|------------------|------------------|----------------|-------------------------|-----------|-----------|
|                  |                  |                | X                       | Y         | Z         |
| 1                | 8                | 0              | 1.491393                | -0.144062 | 1.441323  |
| 2                | 6                | 0              | 2.344570                | -1.219260 | 1.076725  |
| 3                | 7                | 0              | 1.504173                | -2.041384 | 0.196308  |
| 4                | 6                | 0              | 0.471625                | -1.213186 | -0.417157 |
| 5                | 6                | 0              | 0.630106                | 0.138303  | 0.338839  |
| 6                | 6                | 0              | 3.635666                | -0.748130 | 0.413840  |
| 7                | 6                | 0              | 3.954919                | 0.609002  | 0.319238  |
| 8                | 6                | 0              | 5.147937                | 1.020036  | -0.279915 |
| 9                | 6                | 0              | 6.026361                | 0.058991  | -0.772621 |
| 10               | 6                | 0              | 5.735568                | -1.302238 | -0.672405 |
| 11               | 6                | 0              | 4.539924                | -1.699489 | -0.078200 |
| 12               | 17               | 0              | 7.532169                | 0.568032  | -1.530105 |
| 13               | 6                | 0              | -0.692744               | 0.657042  | 0.924844  |
| 14               | 8                | 0              | -0.540165               | 1.666316  | 1.934965  |
| 15               | 6                | 0              | 0.226963                | 2.764113  | 1.716214  |
| 16               | 8                | 0              | 0.828124                | 2.987339  | 0.686760  |
| 17               | 6                | 0              | 1.506536                | -3.413718 | 0.293337  |
| 18               | 8                | 0              | 2.360252                | -3.996357 | 0.956005  |
| 19               | 6                | 0              | -1.746284               | 1.087949  | -0.152407 |
| 20               | 8                | 0              | -1.997457               | 2.491197  | -0.119470 |
| 21               | 6                | 0              | -1.568785               | 3.396493  | -1.072522 |
| 22               | 8                | 0              | -1.916968               | 4.538072  | -0.931906 |
| 23               | 6                | 0              | 0.425384                | -4.150493 | -0.476918 |
| 24               | 6                | 0              | -3.112914               | 0.418362  | 0.113259  |
| 25               | 8                | 0              | -2.890230               | -0.995207 | -0.007119 |
| 26               | 6                | 0              | -3.308506               | -1.941332 | 0.908897  |
| 27               | 8                | 0              | -2.900055               | -3.064132 | 0.749036  |
| 28               | 6                | 0              | 0.213038                | 3.658595  | 2.928869  |
| 29               | 6                | 0              | -4.180006               | 0.841660  | -0.897804 |
| 30               | 8                | 0              | -5.413911               | 0.205317  | -0.566123 |
| 31               | 6                | 0              | -5.921729               | -0.874449 | -1.244679 |
| 32               | 8                | 0              | -6.837231               | -1.469244 | -0.735072 |

|    |   |   |           |           |           |
|----|---|---|-----------|-----------|-----------|
| 33 | 6 | 0 | -0.716259 | 2.901697  | -2.218903 |
| 34 | 6 | 0 | -4.237963 | -1.519964 | 2.022654  |
| 35 | 6 | 0 | -5.323474 | -1.237775 | -2.588001 |
| 36 | 1 | 0 | -5.331540 | -0.388548 | -3.279930 |
| 37 | 1 | 0 | -4.289493 | -1.580774 | -2.476786 |
| 38 | 1 | 0 | -0.518915 | -1.655602 | -0.282372 |
| 39 | 1 | 0 | -5.922084 | -2.047382 | -3.005456 |
| 40 | 1 | 0 | 6.436684  | -2.038066 | -1.051983 |
| 41 | 1 | 0 | -0.792609 | 4.071802  | 3.062644  |
| 42 | 1 | 0 | 5.392018  | 2.074199  | -0.358779 |
| 43 | 1 | 0 | 0.461142  | 3.087381  | 3.828176  |
| 44 | 1 | 0 | 4.308179  | -2.756392 | 0.017124  |
| 45 | 1 | 0 | 2.569832  | -1.795890 | 1.977685  |
| 46 | 1 | 0 | 3.272351  | 1.353530  | 0.715989  |
| 47 | 1 | 0 | 0.641397  | -1.076127 | -1.492788 |
| 48 | 1 | 0 | 1.091235  | 0.886009  | -0.309067 |
| 49 | 1 | 0 | -3.448433 | 0.681311  | 1.119970  |
| 50 | 1 | 0 | -1.108559 | -0.175138 | 1.497276  |
| 51 | 1 | 0 | -1.403407 | 0.772934  | -1.142745 |
| 52 | 1 | 0 | -4.348486 | 1.917843  | -0.825142 |
| 53 | 1 | 0 | -3.855817 | 0.599317  | -1.913937 |
| 54 | 1 | 0 | 0.627972  | -5.219323 | -0.399308 |
| 55 | 1 | 0 | 0.418561  | -3.859803 | -1.533858 |
| 56 | 1 | 0 | -0.572025 | -3.944358 | -0.069796 |
| 57 | 1 | 0 | -3.745570 | -0.820009 | 2.707661  |
| 58 | 1 | 0 | -4.511228 | -2.417118 | 2.578241  |
| 59 | 1 | 0 | -5.137868 | -1.038960 | 1.628697  |
| 60 | 1 | 0 | -0.487527 | 3.761244  | -2.849117 |
| 61 | 1 | 0 | -1.233608 | 2.148950  | -2.824171 |
| 62 | 1 | 0 | 0.217296  | 2.473005  | -1.845006 |
| 63 | 1 | 0 | 0.924795  | 4.471935  | 2.786112  |

---

Cartesians coordinates for compound 7E

E= -2160.093091 HF

Standard orientation:

| Center<br>Number | Atomic<br>Number | Atomic<br>Type | Coordinates (Angstroms) |           |           |
|------------------|------------------|----------------|-------------------------|-----------|-----------|
|                  |                  |                | X                       | Y         | Z         |
| 1                | 8                | 0              | -1.524853               | 0.702623  | 1.276459  |
| 2                | 6                | 0              | -2.516259               | 1.547353  | 0.704583  |
| 3                | 7                | 0              | -1.831236               | 2.179624  | -0.423500 |
| 4                | 6                | 0              | -0.624918               | 1.424770  | -0.766019 |
| 5                | 6                | 0              | -0.726791               | 0.215406  | 0.186347  |
| 6                | 6                | 0              | -3.765536               | 0.754873  | 0.319446  |
| 7                | 6                | 0              | -4.310227               | 0.778317  | -0.966331 |
| 8                | 6                | 0              | -5.461548               | 0.047779  | -1.270409 |
| 9                | 6                | 0              | -6.065765               | -0.712096 | -0.272708 |
| 10               | 6                | 0              | -5.537686               | -0.754919 | 1.019225  |
| 11               | 6                | 0              | -4.391041               | -0.020035 | 1.305737  |
| 12               | 6                | 0              | 0.623390                | -0.197918 | 0.781041  |
| 13               | 8                | 0              | 0.543341                | -1.163334 | 1.844748  |
| 14               | 6                | 0              | -0.151041               | -2.324024 | 1.692999  |
| 15               | 8                | 0              | -0.770397               | -2.633642 | 0.700028  |
| 16               | 17               | 0              | -7.516228               | -1.632894 | -0.642601 |
| 17               | 6                | 0              | -1.972301               | 3.476340  | -0.868806 |
| 18               | 8                | 0              | -1.199003               | 3.935433  | -1.698161 |
| 19               | 6                | 0              | 1.727812                | -0.604523 | -0.242022 |
| 20               | 8                | 0              | 1.900025                | -2.019653 | -0.326111 |
| 21               | 6                | 0              | 1.431839                | -2.821851 | -1.345347 |

|    |   |   |           |           |           |
|----|---|---|-----------|-----------|-----------|
| 22 | 8 | 0 | 1.765368  | -3.976996 | -1.328693 |
| 23 | 6 | 0 | 0.553294  | -2.207275 | -2.410774 |
| 24 | 6 | 0 | -3.121899 | 4.280964  | -0.283398 |
| 25 | 6 | 0 | -0.028269 | -3.164056 | 2.939539  |
| 26 | 6 | 0 | 3.100563  | -0.057697 | 0.215427  |
| 27 | 8 | 0 | 2.978041  | 1.366558  | 0.192838  |
| 28 | 6 | 0 | 3.546279  | 2.215700  | 1.126621  |
| 29 | 8 | 0 | 3.443165  | 3.395831  | 0.922048  |
| 30 | 6 | 0 | 4.217550  | 1.613767  | 2.340418  |
| 31 | 6 | 0 | 4.230495  | -0.485639 | -0.717766 |
| 32 | 8 | 0 | 5.446265  | -0.016440 | -0.126798 |
| 33 | 6 | 0 | 6.664587  | -0.175342 | -0.733319 |
| 34 | 8 | 0 | 7.643019  | 0.204186  | -0.142772 |
| 35 | 6 | 0 | 6.688295  | -0.811260 | -2.106890 |
| 36 | 1 | 0 | -1.240328 | -0.621802 | -0.289851 |
| 37 | 1 | 0 | 4.546389  | 2.437622  | 2.974153  |
| 38 | 1 | 0 | -6.018228 | -1.356503 | 1.783274  |
| 39 | 1 | 0 | -5.881628 | 0.067655  | -2.270348 |
| 40 | 1 | 0 | -0.625831 | 1.129165  | -1.820149 |
| 41 | 1 | 0 | 0.981731  | 0.695802  | 1.295997  |
| 42 | 1 | 0 | -3.254677 | 5.173579  | -0.895963 |
| 43 | 1 | 0 | 0.265612  | 2.039969  | -0.588190 |
| 44 | 1 | 0 | 1.063780  | -1.406251 | -2.956911 |
| 45 | 1 | 0 | 7.727413  | -0.887289 | -2.426974 |
| 46 | 1 | 0 | 1.501735  | -0.171456 | -1.221035 |
| 47 | 1 | 0 | -4.058437 | 3.715033  | -0.250507 |
| 48 | 1 | 0 | -2.882784 | 4.597158  | 0.739804  |
| 49 | 1 | 0 | 0.288048  | -2.997424 | -3.113382 |
| 50 | 1 | 0 | 6.132924  | -0.204590 | -2.831126 |
| 51 | 1 | 0 | -3.968220 | -0.058331 | 2.305896  |
| 52 | 1 | 0 | -3.832975 | 1.367805  | -1.742869 |
| 53 | 1 | 0 | 3.305213  | -0.430740 | 1.223293  |
| 54 | 1 | 0 | -2.768903 | 2.285463  | 1.473290  |
| 55 | 1 | 0 | 6.238296  | -1.809990 | -2.096003 |
| 56 | 1 | 0 | 5.079683  | 1.009448  | 2.046085  |



|    |   |   |           |           |           |
|----|---|---|-----------|-----------|-----------|
| 57 | 1 | 0 | 4.241009  | -1.575164 | -0.808968 |
| 58 | 1 | 0 | 4.076924  | -0.032072 | -1.704540 |
| 59 | 1 | 0 | -0.714945 | -4.008411 | 2.874094  |
| 60 | 1 | 0 | 0.998458  | -3.537239 | 3.023410  |
| 61 | 1 | 0 | -0.359956 | -1.800406 | -1.968530 |
| 62 | 1 | 0 | -0.238812 | -2.566567 | 3.831121  |
| 63 | 1 | 0 | 3.528313  | 0.979045  | 2.909376  |

-----

Cartesians coordinates for compound 8Z

E= -1700.486841 HF

Standard orientation:

-----

| Center<br>Number | Atomic<br>Number | Atomic<br>Type | Coordinates (Angstroms) |           |           |
|------------------|------------------|----------------|-------------------------|-----------|-----------|
|                  |                  |                | X                       | Y         | Z         |
| 1                | 8                | 0              | 2.077959                | 0.017578  | 1.187911  |
| 2                | 6                | 0              | 2.943678                | -1.033954 | 0.779688  |
| 3                | 7                | 0              | 2.063694                | -1.916886 | 0.004238  |
| 4                | 6                | 0              | 0.968996                | -1.139281 | -0.565317 |
| 5                | 6                | 0              | 1.124121                | 0.236281  | 0.150065  |
| 6                | 6                | 0              | 4.148064                | -0.534715 | -0.013283 |
| 7                | 6                | 0              | 4.416957                | 0.830732  | -0.145980 |
| 8                | 6                | 0              | 5.536035                | 1.260145  | -0.864655 |
| 9                | 6                | 0              | 6.398768                | 0.329995  | -1.443530 |
| 10               | 6                | 0              | 6.140584                | -1.036047 | -1.298868 |
| 11               | 6                | 0              | 5.022258                | -1.468044 | -0.587919 |
| 12               | 6                | 0              | -0.173382               | 0.707863  | 0.825858  |
| 13               | 8                | 0              | 0.007722                | 1.745846  | 1.802258  |
| 14               | 6                | 0              | 0.707947                | 2.869885  | 1.506098  |
| 15               | 8                | 0              | 1.211238                | 3.101863  | 0.427495  |

-----

|    |   |   |           |           |           |
|----|---|---|-----------|-----------|-----------|
| 16 | 6 | 0 | 2.108668  | -3.283074 | 0.159820  |
| 17 | 8 | 0 | 3.019871  | -3.817203 | 0.785322  |
| 18 | 6 | 0 | -1.326075 | 1.064378  | -0.173374 |
| 19 | 8 | 0 | -1.639014 | 2.455852  | -0.153170 |
| 20 | 6 | 0 | -1.324965 | 3.356262  | -1.153363 |
| 21 | 8 | 0 | -1.721474 | 4.482360  | -1.013910 |
| 22 | 6 | 0 | 0.998158  | -4.078932 | -0.503700 |
| 23 | 6 | 0 | -2.637225 | 0.346187  | 0.215749  |
| 24 | 8 | 0 | -2.366063 | -1.060182 | 0.114654  |
| 25 | 6 | 0 | -2.682271 | -1.994671 | 1.081614  |
| 26 | 8 | 0 | -2.262049 | -3.111483 | 0.911704  |
| 27 | 6 | 0 | 0.760871  | 3.779887  | 2.706398  |
| 28 | 6 | 0 | -3.796208 | 0.697611  | -0.719251 |
| 29 | 8 | 0 | -4.971609 | 0.011997  | -0.287339 |
| 30 | 6 | 0 | -5.472921 | -1.105160 | -0.908104 |
| 31 | 8 | 0 | -6.333114 | -1.721108 | -0.331854 |
| 32 | 6 | 0 | -0.527566 | 2.877177  | -2.345136 |
| 33 | 6 | 0 | -3.522084 | -1.567944 | 2.262750  |
| 34 | 6 | 0 | -4.937204 | -1.481864 | -2.274212 |
| 35 | 1 | 0 | -5.030329 | -0.656760 | -2.988836 |
| 36 | 1 | 0 | -3.882249 | -1.769443 | -2.216631 |
| 37 | 1 | 0 | 0.004393  | -1.611435 | -0.362111 |
| 38 | 1 | 0 | -5.517966 | -2.332616 | -2.630582 |
| 39 | 1 | 0 | 6.813613  | -1.767304 | -1.739090 |
| 40 | 1 | 0 | -0.250393 | 4.123691  | 2.948636  |
| 41 | 1 | 0 | 5.732281  | 2.324367  | -0.966911 |
| 42 | 1 | 0 | 1.146005  | 3.239239  | 3.576152  |
| 43 | 1 | 0 | 4.826572  | -2.529141 | -0.461950 |
| 44 | 1 | 0 | 3.270126  | -1.570826 | 1.673968  |
| 45 | 1 | 0 | 3.752793  | 1.556090  | 0.313077  |
| 46 | 1 | 0 | 1.070277  | -1.021920 | -1.651925 |
| 47 | 1 | 0 | 1.500038  | 0.988327  | -0.546100 |
| 48 | 1 | 0 | -2.903113 | 0.624419  | 1.238896  |
| 49 | 1 | 0 | -0.503609 | -0.129171 | 1.445465  |
| 50 | 1 | 0 | -1.047237 | 0.738659  | -1.180369 |

|    |   |   |           |           |           |
|----|---|---|-----------|-----------|-----------|
| 51 | 1 | 0 | -4.009996 | 1.766105  | -0.652967 |
| 52 | 1 | 0 | -3.536356 | 0.450227  | -1.752506 |
| 53 | 1 | 0 | 1.237174  | -5.137878 | -0.398411 |
| 54 | 1 | 0 | 0.910287  | -3.832629 | -1.568251 |
| 55 | 1 | 0 | 0.025033  | -3.884251 | -0.036614 |
| 56 | 1 | 0 | -2.988781 | -0.841661 | 2.887109  |
| 57 | 1 | 0 | -3.725223 | -2.457740 | 2.858691  |
| 58 | 1 | 0 | -4.463675 | -1.115855 | 1.938131  |
| 59 | 1 | 0 | -0.398630 | 3.728625  | -3.013530 |
| 60 | 1 | 0 | -1.036955 | 2.075100  | -2.890722 |
| 61 | 1 | 0 | 0.455284  | 2.519012  | -2.027245 |
| 62 | 1 | 0 | 1.395295  | 4.637542  | 2.481901  |
| 63 | 1 | 0 | 7.270525  | 0.664961  | -1.999592 |

-----

Cartesians coordinates for compound 8E

E= -1700.485497 HF

Standard orientation:

| Center<br>Number | Atomic<br>Number | Atomic<br>Type | Coordinates (Angstroms) |           |           |
|------------------|------------------|----------------|-------------------------|-----------|-----------|
|                  |                  |                | X                       | Y         | Z         |
| 1                | 8                | 0              | -2.058419               | 0.358859  | 1.170169  |
| 2                | 6                | 0              | -3.099621               | 1.159408  | 0.615107  |
| 3                | 7                | 0              | -2.445879               | 1.852967  | -0.498323 |
| 4                | 6                | 0              | -1.139166               | 1.263454  | -0.780539 |
| 5                | 6                | 0              | -1.180441               | -0.001949 | 0.094625  |
| 6                | 6                | 0              | -4.303877               | 0.309388  | 0.221711  |
| 7                | 6                | 0              | -4.594044               | -0.025046 | -1.104403 |
| 8                | 6                | 0              | -5.682815               | -0.848090 | -1.403441 |
| 9                | 6                | 0              | -6.490958               | -1.341405 | -0.379569 |

|    |   |   |           |           |           |
|----|---|---|-----------|-----------|-----------|
| 10 | 6 | 0 | -6.209251 | -1.007629 | 0.948066  |
| 11 | 6 | 0 | -5.123640 | -0.186428 | 1.244327  |
| 12 | 6 | 0 | 0.170884  | -0.346816 | 0.729190  |
| 13 | 8 | 0 | 0.119859  | -1.391991 | 1.717070  |
| 14 | 6 | 0 | -0.465101 | -2.590263 | 1.445373  |
| 15 | 8 | 0 | -0.985448 | -2.882443 | 0.392156  |
| 16 | 6 | 0 | -2.787103 | 3.065888  | -1.050694 |
| 17 | 8 | 0 | -2.068039 | 3.590721  | -1.891544 |
| 18 | 6 | 0 | 1.352107  | -0.584086 | -0.261286 |
| 19 | 8 | 0 | 1.655356  | -1.969267 | -0.431207 |
| 20 | 6 | 0 | 1.306908  | -2.730123 | -1.526805 |
| 21 | 8 | 0 | 1.737641  | -3.851912 | -1.573432 |
| 22 | 6 | 0 | 0.432910  | -2.112261 | -2.594536 |
| 23 | 6 | 0 | -4.078200 | 3.699447  | -0.559915 |
| 24 | 6 | 0 | -0.366034 | -3.494653 | 2.648365  |
| 25 | 6 | 0 | 2.649098  | 0.047663  | 0.296212  |
| 26 | 8 | 0 | 2.396972  | 1.453456  | 0.369610  |
| 27 | 6 | 0 | 2.847259  | 2.276672  | 1.386459  |
| 28 | 8 | 0 | 2.642670  | 3.455120  | 1.263248  |
| 29 | 6 | 0 | 3.525405  | 1.647192  | 2.582226  |
| 30 | 6 | 0 | 3.848066  | -0.202654 | -0.615339 |
| 31 | 8 | 0 | 4.991652  | 0.331537  | 0.059104  |
| 32 | 6 | 0 | 6.226397  | 0.397743  | -0.530542 |
| 33 | 8 | 0 | 7.145833  | 0.810578  | 0.128619  |
| 34 | 6 | 0 | 6.340968  | -0.042813 | -1.974291 |
| 35 | 1 | 0 | -1.602669 | -0.847451 | -0.452404 |
| 36 | 1 | 0 | 3.758550  | 2.447558  | 3.284765  |
| 37 | 1 | 0 | -6.837691 | -1.384926 | 1.750279  |
| 38 | 1 | 0 | -5.899160 | -1.099847 | -2.438185 |
| 39 | 1 | 0 | -1.032432 | 1.041492  | -1.846946 |
| 40 | 1 | 0 | 0.426585  | 0.531413  | 1.325388  |
| 41 | 1 | 0 | -4.315150 | 4.537263  | -1.216848 |
| 42 | 1 | 0 | -0.333576 | 1.953220  | -0.496837 |
| 43 | 1 | 0 | 0.907748  | -1.243704 | -3.064525 |
| 44 | 1 | 0 | 7.388298  | 0.028447  | -2.267621 |

|    |   |   |           |           |           |
|----|---|---|-----------|-----------|-----------|
| 45 | 1 | 0 | 1.130388  | -0.105520 | -1.219715 |
| 46 | 1 | 0 | -4.911425 | 2.989652  | -0.550736 |
| 47 | 1 | 0 | -3.951833 | 4.082244  | 0.460786  |
| 48 | 1 | 0 | 0.259861  | -2.872241 | -3.356694 |
| 49 | 1 | 0 | 5.741631  | 0.600726  | -2.628459 |
| 50 | 1 | 0 | -4.903003 | 0.069019  | 2.278471  |
| 51 | 1 | 0 | -3.975490 | 0.369652  | -1.905028 |
| 52 | 1 | 0 | 2.849212  | -0.380172 | 1.282927  |
| 53 | 1 | 0 | -3.391273 | 1.862559  | 1.403764  |
| 54 | 1 | 0 | 5.993943  | -1.072575 | -2.112663 |
| 55 | 1 | 0 | 4.446627  | 1.140753  | 2.282393  |
| 56 | 1 | 0 | 3.969453  | -1.276476 | -0.783441 |
| 57 | 1 | 0 | 3.685225  | 0.307052  | -1.572542 |
| 58 | 1 | 0 | -0.926987 | -4.409884 | 2.458071  |
| 59 | 1 | 0 | 0.684916  | -3.740950 | 2.834619  |
| 60 | 1 | 0 | -0.527084 | -1.799715 | -2.175515 |
| 61 | 1 | 0 | -0.751358 | -2.989686 | 3.539169  |
| 62 | 1 | 0 | 2.873956  | 0.917293  | 3.076572  |
| 63 | 1 | 0 | -7.339257 | -1.979060 | -0.612954 |

-----

Cartesians coordinates for compound 9Z

E= -1814.979507 HF

Standard orientation:

| Center<br>Number | Atomic<br>Number | Atomic<br>Type | Coordinates (Angstroms) |           |          |
|------------------|------------------|----------------|-------------------------|-----------|----------|
|                  |                  |                | X                       | Y         | Z        |
| 1                | 8                | 0              | 1.473833                | -0.025371 | 1.456138 |
| 2                | 6                | 0              | 2.354092                | -1.092740 | 1.123760 |
| 3                | 7                | 0              | 1.532355                | -1.948971 | 0.257525 |

|    |   |   |           |           |           |
|----|---|---|-----------|-----------|-----------|
| 4  | 6 | 0 | 0.524401  | -1.139962 | -0.415645 |
| 5  | 6 | 0 | 0.625341  | 0.220899  | 0.336540  |
| 6  | 6 | 0 | 3.637894  | -0.610001 | 0.459589  |
| 7  | 6 | 0 | 3.946160  | 0.752683  | 0.355564  |
| 8  | 6 | 0 | 5.133254  | 1.169533  | -0.237210 |
| 9  | 6 | 0 | 6.046376  | 0.226984  | -0.727872 |
| 10 | 6 | 0 | 5.755732  | -1.138987 | -0.615664 |
| 11 | 6 | 0 | 4.558379  | -1.544738 | -0.024010 |
| 12 | 8 | 0 | 7.182362  | 0.736654  | -1.289867 |
| 13 | 6 | 0 | 8.153036  | -0.171530 | -1.784032 |
| 14 | 6 | 0 | -0.726519 | 0.692410  | 0.895675  |
| 15 | 8 | 0 | -0.632482 | 1.715512  | 1.899709  |
| 16 | 6 | 0 | 0.100572  | 2.837859  | 1.687193  |
| 17 | 8 | 0 | 0.701683  | 3.082411  | 0.663116  |
| 18 | 6 | 0 | 1.542588  | -3.317239 | 0.386340  |
| 19 | 8 | 0 | 2.383509  | -3.880407 | 1.081727  |
| 20 | 6 | 0 | -1.782000 | 1.068826  | -0.198278 |
| 21 | 8 | 0 | -2.072438 | 2.465287  | -0.204995 |
| 22 | 6 | 0 | -1.649232 | 3.359052  | -1.170324 |
| 23 | 8 | 0 | -2.038433 | 4.491792  | -1.069929 |
| 24 | 6 | 0 | 0.483683  | -4.080534 | -0.390849 |
| 25 | 6 | 0 | -3.133458 | 0.372508  | 0.076477  |
| 26 | 8 | 0 | -2.877784 | -1.038679 | -0.000867 |
| 27 | 6 | 0 | -3.284226 | -1.966016 | 0.939036  |
| 28 | 8 | 0 | -2.873556 | -3.090739 | 0.801081  |
| 29 | 6 | 0 | 0.052762  | 3.726849  | 2.903460  |
| 30 | 6 | 0 | -4.202917 | 0.739172  | -0.954066 |
| 31 | 8 | 0 | -5.424860 | 0.083881  | -0.613645 |
| 32 | 6 | 0 | -5.891406 | -1.038071 | -1.251995 |
| 33 | 8 | 0 | -6.804975 | -1.630549 | -0.736112 |
| 34 | 6 | 0 | -0.751682 | 2.863486  | -2.281492 |
| 35 | 6 | 0 | -4.203785 | -1.522538 | 2.052792  |
| 36 | 6 | 0 | -5.252673 | -1.449356 | -2.562563 |
| 37 | 1 | 0 | -5.269875 | -0.635706 | -3.295889 |
| 38 | 1 | 0 | -4.212035 | -1.754860 | -2.411958 |

|    |   |   |           |           |           |
|----|---|---|-----------|-----------|-----------|
| 39 | 1 | 0 | -0.466073 | -1.594962 | -0.329690 |
| 40 | 1 | 0 | -5.818445 | -2.295812 | -2.951770 |
| 41 | 1 | 0 | 6.448641  | -1.889664 | -0.978624 |
| 42 | 1 | 0 | -0.976360 | 4.060448  | 3.073541  |
| 43 | 1 | 0 | 5.376968  | 2.223793  | -0.325696 |
| 44 | 1 | 0 | 0.373670  | 3.172252  | 3.790485  |
| 45 | 1 | 0 | 4.343082  | -2.605143 | 0.074460  |
| 46 | 1 | 0 | 2.575640  | -1.644866 | 2.040565  |
| 47 | 1 | 0 | 3.253077  | 1.492202  | 0.743923  |
| 48 | 1 | 0 | 0.749486  | -1.007256 | -1.481837 |
| 49 | 1 | 0 | 1.072369  | 0.980462  | -0.307258 |
| 50 | 1 | 0 | -3.482875 | 0.656833  | 1.072456  |
| 51 | 1 | 0 | -1.115957 | -0.152200 | 1.468489  |
| 52 | 1 | 0 | -1.424795 | 0.737557  | -1.178192 |
| 53 | 1 | 0 | -4.398678 | 1.812355  | -0.914200 |
| 54 | 1 | 0 | -3.865295 | 0.475476  | -1.960527 |
| 55 | 1 | 0 | 0.695109  | -5.145431 | -0.286424 |
| 56 | 1 | 0 | 0.494976  | -3.812699 | -1.453784 |
| 57 | 1 | 0 | -0.523749 | -3.877235 | -0.007442 |
| 58 | 1 | 0 | -3.708968 | -0.800534 | 2.712665  |
| 59 | 1 | 0 | -4.463260 | -2.406954 | 2.634758  |
| 60 | 1 | 0 | -5.112647 | -1.059825 | 1.657362  |
| 61 | 1 | 0 | -0.535679 | 3.713344  | -2.929128 |
| 62 | 1 | 0 | -1.228222 | 2.077890  | -2.878464 |
| 63 | 1 | 0 | 0.185664  | 2.476644  | -1.873160 |
| 64 | 1 | 0 | 0.697545  | 4.591296  | 2.744192  |
| 65 | 1 | 0 | 7.750581  | -0.793888 | -2.594570 |
| 66 | 1 | 0 | 8.967172  | 0.442880  | -2.173215 |
| 67 | 1 | 0 | 8.539344  | -0.823223 | -0.989140 |

---

Cartesians coordinates for compound 9E

E= -1814.979987 HF

Standard orientation:

| Center<br>Number | Atomic<br>Number | Atomic<br>Type | Coordinates (Angstroms) |           |           |
|------------------|------------------|----------------|-------------------------|-----------|-----------|
|                  |                  |                | X                       | Y         | Z         |
| 1                | 8                | 0              | -1.487674               | 0.726342  | 1.280446  |
| 2                | 6                | 0              | -2.488242               | 1.572194  | 0.712438  |
| 3                | 7                | 0              | -1.829274               | 2.134626  | -0.470941 |
| 4                | 6                | 0              | -0.594081               | 1.413102  | -0.768030 |
| 5                | 6                | 0              | -0.698847               | 0.218189  | 0.196624  |
| 6                | 6                | 0              | -3.771365               | 0.807127  | 0.420918  |
| 7                | 6                | 0              | -4.163094               | 0.435552  | -0.864832 |
| 8                | 6                | 0              | -5.325690               | -0.310543 | -1.084150 |
| 9                | 6                | 0              | -6.115632               | -0.695526 | 0.003955  |
| 10               | 6                | 0              | -5.733269               | -0.323597 | 1.303951  |
| 11               | 6                | 0              | -4.578824               | 0.416806  | 1.502438  |
| 12               | 6                | 0              | 0.649491                | -0.197431 | 0.793997  |
| 13               | 8                | 0              | 0.562435                | -1.162579 | 1.857756  |
| 14               | 6                | 0              | -0.133466               | -2.321287 | 1.702658  |
| 15               | 8                | 0              | -0.724171               | -2.643720 | 0.696293  |
| 16               | 8                | 0              | -7.267107               | -1.417736 | -0.087141 |
| 17               | 6                | 0              | -7.705280               | -1.828292 | -1.373819 |
| 18               | 6                | 0              | -2.087298               | 3.337065  | -1.086380 |
| 19               | 8                | 0              | -1.367354               | 3.740623  | -1.991394 |
| 20               | 6                | 0              | 1.758700                | -0.601055 | -0.225306 |



|    |   |   |           |           |           |
|----|---|---|-----------|-----------|-----------|
| 21 | 8 | 0 | 1.944075  | -2.015050 | -0.305335 |
| 22 | 6 | 0 | 1.480736  | -2.822328 | -1.321710 |
| 23 | 8 | 0 | 1.826808  | -3.974118 | -1.307035 |
| 24 | 6 | 0 | 0.591365  | -2.217543 | -2.383857 |
| 25 | 6 | 0 | -3.288853 | 4.117994  | -0.580447 |
| 26 | 6 | 0 | -0.059096 | -3.138348 | 2.968321  |
| 27 | 6 | 0 | 3.126865  | -0.041464 | 0.230598  |
| 28 | 8 | 0 | 2.994827  | 1.381931  | 0.197312  |
| 29 | 6 | 0 | 3.554000  | 2.241498  | 1.125939  |
| 30 | 8 | 0 | 3.443019  | 3.419637  | 0.912892  |
| 31 | 6 | 0 | 4.226849  | 1.653302  | 2.345595  |
| 32 | 6 | 0 | 4.260975  | -0.467380 | -0.698361 |
| 33 | 8 | 0 | 5.473158  | 0.016804  | -0.111356 |
| 34 | 6 | 0 | 6.691139  | -0.130886 | -0.720445 |
| 35 | 8 | 0 | 7.667598  | 0.260000  | -0.133780 |
| 36 | 6 | 0 | 6.717978  | -0.769537 | -2.092825 |
| 37 | 1 | 0 | -1.218435 | -0.621459 | -0.270044 |
| 38 | 1 | 0 | 4.550688  | 2.484030  | 2.972905  |
| 39 | 1 | 0 | -6.361577 | -0.627112 | 2.135409  |
| 40 | 1 | 0 | -8.628661 | -2.386557 | -1.210533 |
| 41 | 1 | 0 | -5.601183 | -0.578598 | -2.097591 |
| 42 | 1 | 0 | -0.559729 | 1.110963  | -1.819510 |
| 43 | 1 | 0 | 1.005334  | 0.695720  | 1.311662  |
| 44 | 1 | 0 | -3.491342 | 4.923454  | -1.287492 |
| 45 | 1 | 0 | -6.968395 | -2.479948 | -1.861165 |
| 46 | 1 | 0 | -7.911779 | -0.967194 | -2.022873 |
| 47 | 1 | 0 | 0.280441  | 2.046369  | -0.569979 |
| 48 | 1 | 0 | 1.092517  | -1.413908 | -2.934794 |
| 49 | 1 | 0 | 7.757169  | -0.837188 | -2.414576 |
| 50 | 1 | 0 | 1.530699  | -0.173463 | -1.206179 |
| 51 | 1 | 0 | -4.177494 | 3.488555  | -0.470648 |
| 52 | 1 | 0 | -3.068943 | 4.562074  | 0.398758  |
| 53 | 1 | 0 | 0.329013  | -3.011652 | -3.083131 |
| 54 | 1 | 0 | 6.156172  | -0.169026 | -2.817246 |
| 55 | 1 | 0 | -4.290516 | 0.693882  | 2.514009  |

|    |   |   |           |           |           |
|----|---|---|-----------|-----------|-----------|
| 56 | 1 | 0 | -3.562784 | 0.739638  | -1.717360 |
| 57 | 1 | 0 | 3.332866  | -0.405560 | 1.241467  |
| 58 | 1 | 0 | -2.682053 | 2.347252  | 1.462974  |
| 59 | 1 | 0 | 6.276408  | -1.771976 | -2.079244 |
| 60 | 1 | 0 | 5.092311  | 1.050828  | 2.057354  |
| 61 | 1 | 0 | 4.281008  | -1.557440 | -0.780572 |
| 62 | 1 | 0 | 4.103783  | -0.023241 | -1.688789 |
| 63 | 1 | 0 | -0.681753 | -4.026710 | 2.860584  |
| 64 | 1 | 0 | 0.978582  | -3.436167 | 3.152788  |
| 65 | 1 | 0 | -0.321938 | -1.816852 | -1.936445 |
| 66 | 1 | 0 | -0.390686 | -2.543832 | 3.825041  |
| 67 | 1 | 0 | 3.539919  | 1.019982  | 2.918894  |

-----

Cartesians coordinates for compound 10Z

E= -1739.780642 HF

Standard orientation:

-----

| Center<br>Number | Atomic<br>Number | Atomic<br>Type | Coordinates (Angstroms) |           |           |
|------------------|------------------|----------------|-------------------------|-----------|-----------|
|                  |                  |                | X                       | Y         | Z         |
| 1                | 8                | 0              | 1.774346                | -0.070562 | 1.340432  |
| 2                | 6                | 0              | 2.630475                | -1.141063 | 0.960650  |
| 3                | 7                | 0              | 1.767887                | -1.982715 | 0.121451  |
| 4                | 6                | 0              | 0.737231                | -1.159614 | -0.499345 |
| 5                | 6                | 0              | 0.884037                | 0.194340  | 0.258128  |
| 6                | 6                | 0              | 3.889603                | -0.664253 | 0.245177  |
| 7                | 6                | 0              | 4.204560                | 0.691747  | 0.139965  |
| 8                | 6                | 0              | 5.376245                | 1.095780  | -0.506119 |
| 9                | 6                | 0              | 6.264098                | 0.163211  | -1.050105 |
| 10               | 6                | 0              | 5.945299                | -1.198053 | -0.922876 |

-----

|    |   |   |           |           |           |
|----|---|---|-----------|-----------|-----------|
| 11 | 6 | 0 | 4.778214  | -1.609914 | -0.286880 |
| 12 | 6 | 0 | 7.525318  | 0.598813  | -1.759362 |
| 13 | 6 | 0 | -0.438185 | 0.678122  | 0.874598  |
| 14 | 8 | 0 | -0.290398 | 1.692938  | 1.880595  |
| 15 | 6 | 0 | 0.447920  | 2.807383  | 1.646360  |
| 16 | 8 | 0 | 1.010774  | 3.051910  | 0.600672  |
| 17 | 6 | 0 | 1.764409  | -3.352071 | 0.249089  |
| 18 | 8 | 0 | 2.622499  | -3.926585 | 0.912860  |
| 19 | 6 | 0 | -1.531448 | 1.075604  | -0.173804 |
| 20 | 8 | 0 | -1.806161 | 2.475215  | -0.157058 |
| 21 | 6 | 0 | -1.410747 | 3.373071  | -1.130302 |
| 22 | 8 | 0 | -1.780988 | 4.509552  | -1.003763 |
| 23 | 6 | 0 | 0.669001  | -4.100280 | -0.490969 |
| 24 | 6 | 0 | -2.878740 | 0.391355  | 0.147060  |
| 25 | 8 | 0 | -2.642436 | -1.021286 | 0.042614  |
| 26 | 6 | 0 | -3.024369 | -1.955797 | 0.985716  |
| 27 | 8 | 0 | -2.630417 | -3.082744 | 0.820108  |
| 28 | 6 | 0 | 0.460980  | 3.687531  | 2.869910  |
| 29 | 6 | 0 | -3.983679 | 0.783550  | -0.835547 |
| 30 | 8 | 0 | -5.197550 | 0.133710  | -0.458107 |
| 31 | 6 | 0 | -5.705135 | -0.966627 | -1.102960 |
| 32 | 8 | 0 | -6.605521 | -1.559096 | -0.564563 |
| 33 | 6 | 0 | -0.565313 | 2.877538  | -2.281693 |
| 34 | 6 | 0 | -3.898828 | -1.516484 | 2.136808  |
| 35 | 6 | 0 | -5.125350 | -1.354908 | -2.447615 |
| 36 | 1 | 0 | -5.162518 | -0.524477 | -3.161147 |
| 37 | 1 | 0 | -4.083263 | -1.675831 | -2.347531 |
| 38 | 1 | 0 | -0.252207 | -1.606873 | -0.372148 |
| 39 | 1 | 0 | -5.717103 | -2.185596 | -2.832125 |
| 40 | 1 | 0 | 6.625076  | -1.946237 | -1.325766 |
| 41 | 1 | 0 | -0.556826 | 4.027462  | 3.088383  |
| 42 | 1 | 0 | 5.602747  | 2.157141  | -0.581711 |
| 43 | 1 | 0 | 0.816758  | 3.123527  | 3.737545  |
| 44 | 1 | 0 | 4.555192  | -2.668338 | -0.184644 |
| 45 | 1 | 0 | 2.889396  | -1.703654 | 1.861200  |

|    |   |   |           |           |           |
|----|---|---|-----------|-----------|-----------|
| 46 | 1 | 0 | 3.538167  | 1.434846  | 0.566655  |
| 47 | 1 | 0 | 0.914651  | -1.020423 | -1.573632 |
| 48 | 1 | 0 | 1.313780  | 0.953561  | -0.397660 |
| 49 | 1 | 0 | -3.184479 | 0.666858  | 1.159742  |
| 50 | 1 | 0 | -0.815169 | -0.165373 | 1.457475  |
| 51 | 1 | 0 | -1.216124 | 0.749107  | -1.169635 |
| 52 | 1 | 0 | -4.166721 | 1.857892  | -0.772338 |
| 53 | 1 | 0 | -3.687352 | 0.532272  | -1.858009 |
| 54 | 1 | 0 | 0.873521  | -5.167762 | -0.400155 |
| 55 | 1 | 0 | 0.642457  | -3.826526 | -1.552082 |
| 56 | 1 | 0 | -0.321003 | -3.889501 | -0.068289 |
| 57 | 1 | 0 | -3.372077 | -0.809624 | 2.788370  |
| 58 | 1 | 0 | -4.148869 | -2.405461 | 2.715932  |
| 59 | 1 | 0 | -4.814797 | -1.037243 | 1.779408  |
| 60 | 1 | 0 | -0.364433 | 3.731377  | -2.928950 |
| 61 | 1 | 0 | -1.075694 | 2.104459  | -2.866938 |
| 62 | 1 | 0 | 0.382452  | 2.474363  | -1.915498 |
| 63 | 1 | 0 | 1.105086  | 4.548172  | 2.688731  |
| 64 | 1 | 0 | 8.400337  | 0.046283  | -1.397010 |
| 65 | 1 | 0 | 7.458971  | 0.419845  | -2.840649 |
| 66 | 1 | 0 | 7.718083  | 1.666459  | -1.613318 |

-----

Cartesians coordinates for compound 10E

E= -1739.779314 HF

Standard orientation:

| Center<br>Number | Atomic<br>Number | Atomic<br>Type | Coordinates (Angstroms) |          |          |
|------------------|------------------|----------------|-------------------------|----------|----------|
|                  |                  |                | X                       | Y        | Z        |
| 1                | 8                | 0              | -1.775071               | 0.545074 | 1.208362 |

|    |   |   |           |           |           |
|----|---|---|-----------|-----------|-----------|
| 2  | 6 | 0 | -2.781499 | 1.389865  | 0.652502  |
| 3  | 7 | 0 | -2.107385 | 2.027493  | -0.482621 |
| 4  | 6 | 0 | -0.840515 | 1.361047  | -0.773925 |
| 5  | 6 | 0 | -0.935408 | 0.116904  | 0.127424  |
| 6  | 6 | 0 | -4.033945 | 0.601123  | 0.289371  |
| 7  | 6 | 0 | -4.367968 | 0.264268  | -1.023676 |
| 8  | 6 | 0 | -5.503774 | -0.504192 | -1.291882 |
| 9  | 6 | 0 | -6.334408 | -0.954096 | -0.261427 |
| 10 | 6 | 0 | -5.994127 | -0.608030 | 1.056228  |
| 11 | 6 | 0 | -4.865370 | 0.157200  | 1.327351  |
| 12 | 6 | 0 | 0.406468  | -0.285237 | 0.748188  |
| 13 | 8 | 0 | 0.318993  | -1.307572 | 1.757348  |
| 14 | 6 | 0 | -0.330989 | -2.479037 | 1.519584  |
| 15 | 8 | 0 | -0.884558 | -2.764626 | 0.481597  |
| 16 | 6 | 0 | -7.566322 | -1.780355 | -0.547370 |
| 17 | 6 | 0 | -2.387315 | 3.248835  | -1.049792 |
| 18 | 8 | 0 | -1.652105 | 3.719186  | -1.908961 |
| 19 | 6 | 0 | 1.559056  | -0.600493 | -0.253691 |
| 20 | 8 | 0 | 1.788050  | -2.002341 | -0.402876 |
| 21 | 6 | 0 | 1.383167  | -2.765097 | -1.477175 |
| 22 | 8 | 0 | 1.754604  | -3.908513 | -1.507585 |
| 23 | 6 | 0 | 0.524160  | -2.124146 | -2.543452 |
| 24 | 6 | 0 | -3.633682 | 3.961828  | -0.552237 |
| 25 | 6 | 0 | -0.256419 | -3.364344 | 2.738542  |
| 26 | 6 | 0 | 2.895326  | -0.029681 | 0.276136  |
| 27 | 8 | 0 | 2.719781  | 1.388355  | 0.333303  |
| 28 | 6 | 0 | 3.225565  | 2.198827  | 1.333867  |
| 29 | 8 | 0 | 3.087734  | 3.385237  | 1.195142  |
| 30 | 6 | 0 | 3.877115  | 1.548726  | 2.533593  |
| 31 | 6 | 0 | 4.067101  | -0.353677 | -0.647511 |
| 32 | 8 | 0 | 5.245836  | 0.123836  | 0.008956  |
| 33 | 6 | 0 | 6.472199  | 0.136406  | -0.600905 |
| 34 | 8 | 0 | 7.420290  | 0.504485  | 0.044081  |
| 35 | 6 | 0 | 6.542786  | -0.303082 | -2.047880 |
| 36 | 1 | 0 | -1.410675 | -0.715344 | -0.395995 |

|    |   |   |           |           |           |
|----|---|---|-----------|-----------|-----------|
| 37 | 1 | 0 | 4.157314  | 2.344191  | 3.224416  |
| 38 | 1 | 0 | -6.625421 | -0.941947 | 1.876924  |
| 39 | 1 | 0 | -5.746886 | -0.754672 | -2.321867 |
| 40 | 1 | 0 | -0.764428 | 1.112725  | -1.837165 |
| 41 | 1 | 0 | 0.715539  | 0.590337  | 1.322743  |
| 42 | 1 | 0 | -3.828830 | 4.804957  | -1.216057 |
| 43 | 1 | 0 | 0.006245  | 2.011039  | -0.517483 |
| 44 | 1 | 0 | 1.030761  | -1.284904 | -3.032978 |
| 45 | 1 | 0 | 7.587603  | -0.281143 | -2.357580 |
| 46 | 1 | 0 | 1.348655  | -0.127229 | -1.217234 |
| 47 | 1 | 0 | -4.506092 | 3.301183  | -0.526554 |
| 48 | 1 | 0 | -3.474368 | 4.347067  | 0.462924  |
| 49 | 1 | 0 | 0.306558  | -2.886898 | -3.291285 |
| 50 | 1 | 0 | 5.965106  | 0.371637  | -2.690065 |
| 51 | 1 | 0 | -4.618784 | 0.408886  | 2.356656  |
| 52 | 1 | 0 | -3.746551 | 0.612602  | -1.843542 |
| 53 | 1 | 0 | 3.086791  | -0.454603 | 1.265757  |
| 54 | 1 | 0 | -3.022089 | 2.121569  | 1.432382  |
| 55 | 1 | 0 | 6.144171  | -1.314261 | -2.184302 |
| 56 | 1 | 0 | 4.768262  | 0.990276  | 2.235013  |
| 57 | 1 | 0 | 4.128785  | -1.433940 | -0.806950 |
| 58 | 1 | 0 | 3.920002  | 0.155667  | -1.607323 |
| 59 | 1 | 0 | -0.869684 | -4.251207 | 2.577473  |
| 60 | 1 | 0 | 0.783290  | -3.664033 | 2.909028  |
| 61 | 1 | 0 | -0.415056 | -1.762571 | -2.116674 |
| 62 | 1 | 0 | -0.595587 | -2.822478 | 3.626398  |
| 63 | 1 | 0 | 3.191220  | 0.860602  | 3.041021  |
| 64 | 1 | 0 | -8.478063 | -1.264618 | -0.220777 |
| 65 | 1 | 0 | -7.667681 | -1.991051 | -1.616421 |
| 66 | 1 | 0 | -7.534057 | -2.740628 | -0.018254 |

---
